# Supplementary material
Source: HighWire-hosted journal article supplement (https://gut.bmj.com/content/gutjnl-2020-320992)
Supplement: inline-supplementary-material-14 [file inline-supplementary-material-14.xlsx]

## Sheet: Control vs. Sa
ID	m/z	Retention time (min)	Ion mode	Metabolites	Compound ID	Super Class	Class	Sub Class	Adducts	Formula	Score	Fragmentation Score	Mass Error (ppm)	VIP	P-value	adj.P-value	log2(FC)	FC	average(T5Sa)	average(T5Con)	T5Sa-1	T5Sa-2	T5Sa-3	T5Sa-4	T5Sa-5	T5Sa-6	T5Sa-7	T5Sa-8	T5Sa-9	T5Sa-10	T5Con-1	T5Con-2	T5Con-3	T5Con-4	T5Con-5	T5Con-6	T5Con-7	T5Con-8	T5Con-9
0.78_415.0760m/z	415.076	0.775083	neg	3-Methyl-5-pentyl-1,2,4-trithiolane	HMDB0040242	Organoheterocyclic compounds	Trithiolanes	Unclassified	2M-H	C8H16S3	35.6	0	1.1364	1.01965	4.95206e-05	0.000303458	35.7688	5.8543e+10	46425.6	7.93017e-07	33833	17174.7	81363.8	42058.6	37086.5	35876.8	98341	27577	29918.5	61026.2	7.93017e-07	7.93017e-07	7.93017e-07	7.93017e-07	7.93017e-07	7.93017e-07	7.93017e-07	7.93017e-07	7.93017e-07
0.71_205.0680m/z	205.068	0.705617	pos	Galactitol	HMDB0000107	Organic oxygen compounds	Organooxygen compounds	Carbohydrates and carbohydrate conjugates	M+Na	C6H14O6	38.3	0	-1.35279	1.07773	2.31666e-06	2.55895e-05	35.7325	5.70901e+10	45273.4	7.93017e-07	20949.1	56655.5	62901.2	17913.7	29540	36770	77003.2	50984.4	39374.2	60643.1	7.93017e-07	7.93017e-07	7.93017e-07	7.93017e-07	7.93017e-07	7.93017e-07	7.93017e-07	7.93017e-07	7.93017e-07
0.78_339.0343m/z	339.034	0.775083	neg	Gallic acid	HMDB0005807	Benzenoids	Benzene and substituted derivatives	Benzoic acids and derivatives	2M-H	C7H6O5	37.3	0	-4.27568	1.00411	4.20096e-07	6.84995e-06	35.5573	5.05599e+10	40094.8	7.93017e-07	29937	26135.2	67041.4	26473.7	33308.9	31490.7	57785.3	35492.2	34084.9	59198.9	7.93017e-07	7.93017e-07	7.93017e-07	7.93017e-07	7.93017e-07	7.93017e-07	7.93017e-07	7.93017e-07	7.93017e-07
9.60_527.2611m/z	527.261	9.6028	pos	PI(14:0/0:0)	LMGP06050008	Lipids and lipid-like molecules	Glycerophospholipids	Glycerophosphoinositols	M+H-H2O	C23H45O12P	39.4	0	-0.915251	1.29124	0.000519012	0.00204562	8.90239	478.505	78924.9	164.941	81269	172393	55363.4	14494.9	59283.5	47597	42185.6	79875.4	54625	182163	7.93017e-07	7.93017e-07	1083.94	7.93017e-07	7.93017e-07	7.93017e-07	7.93017e-07	400.529	7.93017e-07
17.15_600.5211m/z	600.521	17.1536	neg	Cer(t18:0/16:0)	LMSP02030001	Lipids and lipid-like molecules	Sphingolipids	Ceramides	M+FA-H	C34H69NO4	53.9	76.2	0.408584	1.0065	0.00262939	0.00752705	7.18926	145.943	59247.7	405.965	23744.1	36477.3	11105.2	77692.5	129481	15625.8	34685.6	22977.4	89983.7	150704	1286.13	7.93017e-07	2367.55	7.93017e-07	7.93017e-07	7.93017e-07	7.93017e-07	7.93017e-07	7.93017e-07
12.41_663.4468n	664.454	12.4069	pos	PS(P-16:0/12:0)	LMGP03030001	Lipids and lipid-like molecules	Glycerophospholipids	Glycerophosphoserines	M+H, M+Na	C34H66NO9P	37.1	0	-1.08863	1.00537	0.00413101	0.0108958	6.2616	76.7234	64688.7	843.141	69671.8	51489.9	108276	50640	128739	7.93017e-07	12124.2	4872.78	176729	44344.3	7.93017e-07	7.93017e-07	7.93017e-07	7.93017e-07	7.93017e-07	7.93017e-07	7.93017e-07	7.93017e-07	7588.27
0.78_427.0506m/z	427.051	0.775083	neg	{[(2E)-3-phenylprop-2-en-1-yl]oxy}sulfonic acid	HMDB0135284	Benzenoids	Benzene and substituted derivatives	Styrenes	2M-H	C9H10O4S	36.8	0	-4.93981	1.20666	1.95398e-06	2.2484e-05	5.84298	57.3999	58517.3	1019.47	34877.5	77790	91908.6	26759.2	45722.5	59723.1	45863.8	100072	43322.5	59134.6	7.93017e-07	7.93017e-07	7.93017e-07	2069.93	7.93017e-07	3854.95	7.93017e-07	7.93017e-07	3250.32
9.84_474.3574m/z	474.357	9.84347	pos	23-Acetoxysoladulcidine	HMDB0031402	Lipids and lipid-like molecules	Steroids and steroid derivatives	Steroidal alkaloids	M+H	C29H47NO4	47.7	45.5	-0.919064	1.29147	0.00196118	0.00598151	5.32966	40.215	91672.2	2279.55	37161.5	107318	60281.6	63765.1	162321	40483	38721.8	40784.2	100841	265045	7663.08	896.783	2991.74	2894.02	2097.81	7.93017e-07	480.54	3491.98	7.93017e-07
12.59_399.3252m/z	399.325	12.5923	pos	23,24-didehydro-25-hydroxyvitamin D3 / 23,24-didehydro-25-hydroxycholecalciferol	42094	Unclassified	Unclassified	Unclassified	M+H	C27H42O2	54.8	82.2	-1.33146	1.04297	0.0121324	0.026518	5.11563	34.6704	76935.7	2219.06	30935.9	59012	22236	146372	73973.9	12338.9	26708.6	33591.3	92591.4	271597	7.93017e-07	1686.55	1249.51	4875.24	10316.8	1843.46	7.93017e-07	7.93017e-07	7.93017e-07
0.78_453.0999m/z	453.1	0.775083	neg	8,16-dihydroxy-6-(6-hydroxy-1-benzofuran-2-yl)-12-methyl-3,13-dioxapentacyclo[10.7.1.0²,¹⁰.0⁴,⁹.0¹⁴,¹⁹]icosa-2(10),4,6,8,14(19),15,17-heptaen-11-one	HMDB0137763	Phenylpropanoids and polyketides	2-arylbenzofuran flavonoids	Unclassified	M-H	C27H18O7	34	0	4.12582	1.05244	4.81616e-06	4.56653e-05	4.93977	30.6915	48955.4	1595.08	61472.1	21019.2	84979	33286.9	62643.2	52451.2	64083.7	36898.1	16760.3	55960.4	3110.76	7.93017e-07	7.93017e-07	7.93017e-07	7.93017e-07	6532.21	4712.74	7.93017e-07	7.93017e-07
12.13_649.4309n	650.438	12.134	pos	1-(2-methoxy-5Z,19Z-hexacosadienyl)-sn-glycero-3-phosphoserine	LMGP03060031	Lipids and lipid-like molecules	Glycerophospholipids	Glycerophosphoserines	M+H, M+Na	C33H64NO9P	37.8	0	-1.48991	1.67865	0.00222135	0.0066091	4.93635	30.6189	168693	5509.44	138709	153790	258883	121176	371592	7.93017e-07	66446	13715.6	390983	171637	7.93017e-07	5520.98	7239.44	7.93017e-07	7.93017e-07	7.93017e-07	1993.3	6401.28	28429.9
0.77_557.1211m/z	557.121	0.774933	pos	Pongaglabol	LMPK12110162	Lipids and lipid-like molecules	Polyketides	Flavonoids	2M+H	C17H10O4	36.8	0	-3.58758	1.15215	0.00445574	0.0116075	4.75537	27.0091	69011.7	2555.13	19598.9	57141.4	45102.3	7.93017e-07	7.93017e-07	43310.8	139719	159261	78957.6	147025	22996.2	7.93017e-07	7.93017e-07	7.93017e-07	7.93017e-07	7.93017e-07	7.93017e-07	7.93017e-07	7.93017e-07
10.72_454.3884m/z	454.388	10.7232	pos	27-Deoxy-5b-cyprinol	HMDB0001231	Lipids and lipid-like molecules	Steroids and steroid derivatives	Bile acids, alcohols and derivatives	M+NH4	C27H48O4	38.4	0	-1.4732	1.34628	0.000298104	0.0012986	4.56995	23.7516	100612	4236.03	44223.3	83215.7	91084.7	183853	128950	33652.5	36523.9	47316.8	151605	205700	6640.01	1097.84	12013.1	6314.26	7.93017e-07	3136.94	7.93017e-07	5145.37	3776.73
2.13_328.1385m/z	328.138	2.12802	pos	N-(1-Deoxy-1-fructosyl)phenylalanine	HMDB0037846	Organic acids and derivatives	Carboxylic acids and derivatives	Amino acids, peptides, and analogues	M+H	C15H21NO7	55.8	87.1	-1.7805	1.82898	0.00341462	0.00935635	3.59636	12.0951	184776	15276.9	30720.6	95290.6	109464	50411	60411	138821	402588	428491	321808	209755	39018.1	7263.66	5140.44	10653.6	8807.4	18603	24200.2	16763.2	7042.32
1.32_292.1402m/z	292.14	1.31702	neg	N-(1-Deoxy-1-fructosyl)isoleucine	HMDB0039780	Organic acids and derivatives	Carboxylic acids and derivatives	Amino acids, peptides, and analogues	M-H	C12H23NO7	50	54.1	0.216721	1.08632	0.00344112	0.00941556	3.4733	11.1063	65337.7	5882.96	6825.77	27852.8	43480.4	17049.2	25837.6	57500.7	159210	137403	99829.2	78388.6	10775.1	3720.3	3259.57	3674.36	5389.58	7211.34	8229.67	8094.73	2592
1.12_261.1438m/z	261.144	1.12177	pos	gamma-Glutamylleucine	HMDB0011171	Organic acids and derivatives	Carboxylic acids and derivatives	Amino acids, peptides, and analogues	M+H	C11H20N2O5	38.4	0	-2.57846	2.52772	4.12474e-07	6.78665e-06	3.35002	10.1966	282870	27741.6	194243	227120	328462	207485	223510	446010	335503	430778	198064	237522	36015.4	18450.8	15775.8	38745.2	16354.7	33752.3	34152.7	27639.9	28787.3
2.97_427.1390m/z	427.139	2.96708	pos	Villosin	48037	Unclassified	Unclassified	Unclassified	M+H	C23H22O8	38.2	0.206	0.595114	1.07541	0.00199287	0.00606109	3.32131	9.99568	66526.7	6655.55	49642.8	19243.7	181969	13128.8	40866	49662.4	50487.1	103460	71534.7	85273	9894.14	4004.64	4992.2	10334.4	5981.16	9560.93	3441.59	4594.99	7095.91
8.22_408.2876n	453.286	8.22133	neg	Cholic acid	206	Lipids and lipid-like molecules	Steroids and steroid derivatives	Bile acids, alcohols and derivatives	M-H, M+FA-H	C24H40O5	47.3	40.8	0.0846053	1.04619	0.000563013	0.00217553	3.31968	9.9844	58051.2	5814.19	18882	106867	79706.2	35276.8	19136.4	15644.4	75424.9	61542.7	117534	50496.8	13821.9	1369.81	1098.48	9215.98	1717.37	9110.77	6770.71	4734.81	4487.84
0.76_555.1072m/z	555.107	0.7611	neg	Neorauteen	LMPK12070144	Lipids and lipid-like molecules	Polyketides	Flavonoids	2M-H	C17H10O4	37.2	0	-2.47761	1.12547	0.000563844	0.0021768	3.2195	9.31463	64707.7	6946.89	60277.6	54024.5	50596.6	24346	37501.4	36865.1	107478	156783	67652	51553.2	7016.25	8832.29	7.93017e-07	7.93017e-07	11799.8	34873.7	7.93017e-07	7.93017e-07	7.93017e-07
8.22_372.2659n	373.273	8.21502	pos	3alpha-Hydroxy-5beta-chola-7,9(11)-dien-24-oic Acid	LMST04010330	Lipids and lipid-like molecules	Sterol Lipids	Bile acids and derivatives	M+H-H2O, M+H	C24H36O3	50.9	60.7	-1.37733	1.23222	0.000721989	0.00266967	3.14568	8.85003	82261.6	9295.06	30294.4	161994	113288	51877.5	23920.9	18622.4	104955	96329.4	156324	65009.1	22158.9	2818.69	1976.05	16604.7	1665.75	15093.1	9693.98	7060.23	6584.18
1.34_294.1542m/z	294.154	1.34355	pos	N-(1-Deoxy-1-fructosyl)leucine	HMDB0037840	Organic acids and derivatives	Carboxylic acids and derivatives	Amino acids, peptides, and analogues	M+H	C12H23NO7	56.4	88.3	-1.80242	2.57452	0.00587176	0.0145013	3.00919	8.05112	395029	49065.1	55679.8	196826	216921	86844	140726	306883	952027	885706	639147	469529	80153.8	34537.9	23584.3	41181	36645.7	59473.9	61457.8	71032.9	33518.3
12.93_481.3322m/z	481.332	12.9309	neg	Ganoderal A	HMDB0035983	Lipids and lipid-like molecules	Prenol lipids	Triterpenoids	M+FA-H	C30H44O2	53.1	68	-0.240289	1.02912	0.00244028	0.00711804	2.96177	7.79078	73526.5	9437.63	28233.2	75278.9	36752.6	146097	86145.2	51817.3	23174.7	29984.3	73553	184229	11748.4	7610.34	18738.8	5229.95	15701.5	6089.9	4437.05	7743.66	7639.06
6.25_513.2756n	514.283	6.25152	pos	Sulfolithocholylglycine	HMDB0002639	Lipids and lipid-like molecules	Steroids and steroid derivatives	Bile acids, alcohols and derivatives	M+H-H2O, M+NH4, M+Na, M+H	C26H43NO7S	44.3	32.9	-0.802228	1.70078	0.00860301	0.0199263	2.91164	7.52473	189038	25122.2	73724.3	179713	195959	72097.8	95650.3	36058.3	208835	180740	234468	613135	38710.1	2909.38	1105.97	47351	3899.25	63063.8	17806.2	33582.8	17671.6
6.77_256.1453n	257.153	6.76797	pos	3,3'-Dimethylbisphenol A	69977	Unclassified	Unclassified	Unclassified	M+H, 2M+H	C17H20O2	37.8	0.986	-4.21517	1.14029	4.5358e-07	7.27209e-06	2.88521	7.38812	58957.2	7980	44518.2	57539.9	88650.5	48656.8	38305.3	41197.4	92871.2	69435.5	48825.7	59571.7	11593.8	13318.6	3615.85	6612.24	5897.63	9530.14	6569.19	8016.95	6665.64
12.42_331.2625m/z	331.263	12.4211	pos	DPA	LMFA04000044	Lipids and lipid-like molecules	Fatty Acyls	Docosanoids	M+H	C22H34O2	54.3	77.9	-1.88687	1.85233	0.00104391	0.00358353	2.87076	7.3145	215328	29438.5	139835	223772	154564	293032	316801	91412.2	94612.8	108992	185001	545256	44735.7	22471.2	56070.3	20374.5	16420.2	15036.7	15350.2	47010.9	27476.7
10.11_426.3571m/z	426.357	10.1125	pos	Elaidic carnitine	HMDB0006464	Lipids and lipid-like molecules	Fatty Acyls	Fatty acid esters	M+H	C25H47NO4	48.7	51	-1.66487	2.67214	0.00141259	0.00459007	2.83898	7.15514	455668	63683.9	243849	423680	316552	397818	583113	222491	218096	217961	779216	1.1539e+06	95219.8	54938.1	100073	121405	57187.7	49276.7	16802.5	54176.8	24075.9
8.15_288.2085n	289.216	8.15322	pos	Dehydroepiandrosterone	HMDB0000077	Lipids and lipid-like molecules	Steroids and steroid derivatives	Androstane steroids	M+H-H2O, M+H	C19H28O2	46.4	36.5	-1.47085	3.94404	0.0068125	0.0164338	2.83667	7.14369	1.11029e+06	155422	737797	1.03445e+06	422029	1.59842e+06	1.1569e+06	642447	525077	1.01164e+06	448798	3.5253e+06	215940	172496	61639.9	276155	173374	209588	159865	41680.6	88058.9
9.62_472.3419m/z	472.342	9.61683	pos	Cervonyl carnitine	HMDB0006510	Lipids and lipid-like molecules	Fatty Acyls	Fatty acid esters	M+H	C29H45NO4	38.6	0	-0.518489	1.13418	0.00426212	0.0111877	2.82217	7.07227	84652.3	11969.6	36191.4	95006.9	56088.1	59719.6	131416	47008.1	44639.4	46487.2	77313.3	252652	17749.1	13760.3	20749.7	16530.3	12518.4	9214.23	3596.79	11693.9	1913.76
3.43_362.0993m/z	362.099	3.433	pos	Rutagravine	HMDB0033446	Organoheterocyclic compounds	Quinolines and derivatives	Benzoquinolines	M+Na	C19H17NO5	53.2	77.7	-1.84716	3.32614	0.00361365	0.00980719	2.81904	7.05694	672155	95247.4	137235	467936	258449	152348	201151	734530	1.38913e+06	1.22165e+06	1.38498e+06	774136	231270	40561.9	82114.6	97856.1	60145.3	96221.2	125917	73241.5	49898.6
16.11_580.4946m/z	580.495	16.1074	neg	N-[(4E,8E)-1,3-dihydroxyoctadeca-4,8-dien-2-yl]hexadecanamide	HMDB0035480	Lipids and lipid-like molecules	Sphingolipids	Ceramides	M+FA-H	C34H65NO3	54.8	81.1	-0.14536	1.00498	0.000700569	0.00260156	2.78472	6.89103	63477.5	9211.61	33096.9	56239	37077.1	104089	83354.6	27016.4	36616.9	46096.3	60828.4	150360	10944	15883	19784.2	7391.78	7028.83	9373.16	1021.73	9041.09	2436.67
7.85_404.1885m/z	404.188	7.85425	pos	NNAL-N-glucuronide	HMDB0060498	Organic oxygen compounds	Organooxygen compounds	Carbohydrates and carbohydrate conjugates	M+NH4	C16H24N3O8+	48.7	53.7	-4.35394	1.24924	0.000364957	0.0015418	2.77276	6.83414	84705.2	12394.4	84280.2	69694.5	14680.3	48124.2	71947.2	56577.6	194419	114138	92801.9	100389	22965.8	19392.3	7.93017e-07	14819.7	17062.9	26047.2	9022.52	7.93017e-07	2239.3
11.18_456.4041m/z	456.404	11.1785	pos	Arachidyl carnitine	HMDB0006460	Lipids and lipid-like molecules	Fatty Acyls	Fatty acid esters	M+H	C27H53NO4	38.2	0	-1.42525	1.15011	0.00164658	0.00519465	2.72334	6.60399	96464.8	14607.1	56077.6	69178.6	79904.8	246872	123777	44043.7	50506.9	46842.4	86482	160963	20018.7	3019.84	41435.1	11426.8	8769.91	13987.1	2670.7	15901.8	14233.6
2.91_232.1540m/z	232.154	2.90923	pos	Isobutyryl-L-carnitine	HMDB0000736	Lipids and lipid-like molecules	Fatty Acyls	Fatty acid esters	M+H	C11H21NO4	53.8	72	-1.33471	7.04673	7.66883e-10	6.21019e-08	2.69536	6.47717	2.19749e+06	339267	2.02013e+06	2.26065e+06	3.23714e+06	1.60666e+06	2.04309e+06	1.93383e+06	2.36308e+06	2.47309e+06	1.81891e+06	2.21831e+06	426000	321643	206216	395118	247170	445182	258386	370492	383195
10.98_536.3343m/z	536.334	10.9791	pos	PS(20:0/0:0)	LMGP03050012	Lipids and lipid-like molecules	Glycerophospholipids	Glycerophosphoserines	M+H-H2O	C26H52NO9P	38.5	0	-0.711115	1.04774	0.00593925	0.0146346	2.68043	6.41045	83570.5	13036.6	83986.1	68905.4	118160	61858.5	153893	7139.31	45995.2	17907.3	225962	51898.7	3450.46	3280.4	23630.9	9518.06	6347.31	15756.1	5843.95	14537.4	34964.9
0.76_369.0904n	368.077	0.7611	neg	Tripamide	HMDB0042054	Lipids and lipid-like molecules	Prenol lipids	Monoterpenoids	M-H2O-H, M-H	C16H20ClN3O3S	34.2	0	-2.65968	1.58841	1.05629e-06	1.38355e-05	2.6609	6.32428	120155	18999	76468	90350.5	206710	62873.4	108276	145232	134527	125651	116033	135430	21002.3	14645	21854.5	9189.24	13541	21969.1	28434.1	21518.9	18836.8
3.42_362.0824m/z	362.082	3.41835	neg	Cefadroxil	HMDB0015271	Organoheterocyclic compounds	Lactams	Beta lactams	M-H	C16H17N3O5S	37.5	0	2.28973	1.28536	0.00180481	0.00560173	2.64876	6.2713	98510.4	15708.1	17077.4	63618.1	47731.3	33276.4	36451.4	143844	205278	154359	168239	115229	26060.1	7315.72	16713.7	14589.7	14460.8	15546.2	20551.8	15583.1	10552
9.67_448.3415m/z	448.342	9.67343	pos	Vaccenyl carnitine	HMDB0006351	Lipids and lipid-like molecules	Fatty Acyls	Fatty acid esters	M+Na	C25H47NO4	49.7	55.3	4.17051	3.25292	0.00312305	0.00867808	2.64712	6.26414	712285	113708	454846	677295	417458	691741	1.17795e+06	414863	385110	374677	518565	2.01035e+06	234104	115412	188755	123392	107165	104855	36266.5	81478.4	31949.4
16.66_523.4962n	524.503	16.6584	pos	Cer(d16:1/17:0)	LMSP02010015	Lipids and lipid-like molecules	Sphingolipids	Ceramides	M+H, M+Na, M+H-H2O	C33H65NO3	45.5	33.7	-0.542813	1.1573	0.00159994	0.00507057	2.63944	6.23092	90131.7	14465.2	63559.1	81771.7	63967.4	128741	109216	21307.3	36306	58864.1	106685	230900	27173.9	11323.7	33897.8	13479.5	10326.1	9178.5	2318.32	15163.2	7326.14
3.98_246.1697m/z	246.17	3.9795	pos	2-Methylbutyroylcarnitine	HMDB0000378	Lipids and lipid-like molecules	Fatty Acyls	Fatty acid esters	M+H	C12H23NO4	52.6	66.9	-1.08895	6.31656	2.02509e-08	8.1483e-07	2.62779	6.18077	1.84939e+06	299216	2.05235e+06	1.64223e+06	2.85443e+06	1.20061e+06	1.52028e+06	1.92455e+06	2.10985e+06	2.00561e+06	1.46557e+06	1.71839e+06	349896	164469	175198	500114	293310	338311	160262	261033	450352
9.87_444.3678m/z	444.368	9.8717	pos	3-hydroxyoctadecanoylcarnitine	LMFA07070043	Lipids and lipid-like molecules	Fatty Acyls	Fatty esters	M+H	C25H49NO5	38.3	0	-1.17318	1.06951	0.000547155	0.00213039	2.60335	6.07694	77069.5	12682.3	41047.1	55329.8	62515.6	149123	120320	19074.5	50711.9	49196.2	140693	82684.6	15126	4296.61	32087	11758	11021.3	16645.8	5570.03	12233	5402.74
3.42_360.0855m/z	360.086	3.41835	neg	(R)-S-lactoylglutathionate(1-)	HMDB0062624	Organic acids and derivatives	Carboxylic acids and derivatives	Amino acids, peptides, and analogues	M-H2O-H	C13H21N3O8S	44.5	34.4	-4.16593	2.26074	0.00173056	0.00541428	2.56819	5.93064	307305	51816.5	58261.9	198583	153105	107067	113102	452673	634445	480089	514499	361221	83738.2	29930.6	56114	48133	47986.5	52991.4	67579.1	44281.8	35593.7
10.94_664.3838m/z	664.384	10.9441	neg	OOV-PC	LMGP20010028	Lipids and lipid-like molecules	Glycerophospholipids	Oxidized glycerophospholipids	M+FA-H	C31H58NO9P	53.4	76.7	1.02055	1.07576	0.0229168	0.0445393	2.46638	5.52654	106382	19249.4	116033	74529.1	162072	54001.8	233545	5695.79	40719.4	8568.43	313701	54957.5	1544.89	22000.9	25455.4	5326.47	3701.45	8542.14	7278.21	17337.2	82057.6
0.79_218.1383m/z	218.138	0.788833	pos	Angelic acid	LMFA01020029	Lipids and lipid-like molecules	Fatty Acyls	Fatty Acids and Conjugates	2M+NH4	C5H8O2	39.3	0	-1.95361	1.4795	2.00362e-05	0.000144828	2.45177	5.47088	109525	20019.6	61894.2	163060	162884	34674.4	83279.6	65462	121047	129719	124153	149072	26680.2	25447.2	15864.3	31967.1	11524	20914.5	10550.9	22994.4	14233.6
10.95_578.3443m/z	578.344	10.9509	pos	OOV-PE	LMGP20020037	Lipids and lipid-like molecules	Glycerophospholipids	Oxidized glycerophospholipids	M+H	C28H52NO9P	49.4	55.4	-1.57584	2.10061	0.0056813	0.0141073	2.43856	5.421	341528	63000.9	317685	281159	480737	234114	698424	48781.1	177010	69872.2	843830	263667	31244.7	40242.8	75880.9	44489.5	30377.6	45838.2	45841.6	75611.7	177481
12.87_431.1893m/z	431.189	12.869	neg	S-Furanopetasitin	HMDB0036131	Lipids and lipid-like molecules	Prenol lipids	Sesquiterpenoids	M-H	C24H32O5S	38.2	0	-1.10612	1.07807	0.0195921	0.0391999	2.39134	5.24645	101723	19389	38352.4	87307	41102	159749	177753	44587.8	40170	34370.8	64837.8	329003	18632.8	21485.7	39826.4	12619.2	20394.3	14781.5	12136.7	17665.1	16959.2
7.49_492.3431n	531.31	7.49197	pos	Homodolicholide	HMDB0033907	Lipids and lipid-like molecules	Steroids and steroid derivatives	Steroid lactones	M+Na, M+K	C29H48O6	40.3	13.5	-3.96551	1.0564	5.54111e-09	3.11993e-07	2.35701	5.12306	52413.3	10230.9	48742.2	62038.8	63170.2	40577.3	36666.4	36374.1	58035.5	68348.9	55079.9	55099.2	12341.5	12133	5592.49	13339	8931.66	14132.2	5381.21	10479.3	9747.3
10.81_564.3291m/z	564.329	10.8088	pos	OOB-PE	LMGP20020034	Lipids and lipid-like molecules	Glycerophospholipids	Oxidized glycerophospholipids	M+H	C27H50NO9P	52	68.5	-0.926227	1.78382	0.00242957	0.00708962	2.35494	5.11572	230140	44986.9	257434	180751	341439	169961	469744	29984.1	151613	56717.3	458892	184866	21617	25358.3	52287.8	31707.1	15632.9	40643.6	29545.2	49780.5	138309
1.26_276.1438m/z	276.144	1.26053	pos	Glutarylcarnitine	LMFA07070066	Lipids and lipid-like molecules	Fatty Acyls	Fatty esters	M+H	C12H21NO6	53.4	71.1	-1.43773	4.88416	0.000195603	0.000923535	2.33569	5.04791	1.46335e+06	289893	1.01176e+06	698781	3.30813e+06	1.4517e+06	1.59936e+06	1.54654e+06	855770	1.51054e+06	1.10327e+06	1.54767e+06	569977	270499	114653	528159	406964	269427	152830	181426	115098
16.90_385.3458m/z	385.346	16.9029	pos	7-dehydrocholesterol	3902	Lipids and lipid-like molecules	Steroids and steroid derivatives	Cholestane steroids	M+H	C27H44O	54.5	79.5	-1.86521	1.06549	0.000618496	0.00234345	2.33444	5.04356	75255.2	14921	57677.9	72428.1	134034	73935	77204.9	20424.1	27728.1	34236.9	138979	115903	20108.4	7377.37	22949.8	11496	11183.6	14484.1	7743.98	16829	22117
0.77_499.0793m/z	499.079	0.774933	pos	Wyeronic acid	HMDB0039141	Lipids and lipid-like molecules	Fatty Acyls	Fatty acids and conjugates	2M+K	C13H10O4	37.7	0	0.750118	1.31852	0.00412911	0.0108925	2.30506	4.94188	116917	23658.4	202386	246107	62384.7	7.93017e-07	82859.8	30238.2	106718	122227	140898	175349	4314.85	7.93017e-07	7.93017e-07	7.93017e-07	110732	42539.7	27728.3	2812.44	24797.7
10.96_637.3944n	620.391	10.9649	pos	PS(12:0/13:0)	LMGP03010001	Lipids and lipid-like molecules	Glycerophospholipids	Glycerophosphoserines	M+H-H2O, M+Na, M+H	C31H60NO10P	44.3	28.9	-1.70025	2.34214	0.0222694	0.0435002	2.26287	4.79945	521527	108664	544002	349044	669948	289152	1.04908e+06	54790.6	266796	91526.7	1.60942e+06	291504	45687.6	75133.2	109589	66444	36849.2	84022.4	65073.6	127428	367747
10.69_508.3030m/z	508.303	10.6948	pos	1-Stearoylglycerophosphoserine	HMDB0061698	Lipids and lipid-like molecules	Glycerophospholipids	Glycerophosphoserines	M+H-H2O	C24H48NO9P	38.3	0	-0.655282	1.20627	7.09208e-05	0.000407217	2.26253	4.79831	85978.1	17918.4	107590	55548.4	124534	83002.4	135631	32798	45353.5	137136	80565.9	57621.7	12677.6	10726	24371.7	14633.3	26294.9	16913.5	9313.48	15049.3	31285.9
6.77_582.2720m/z	582.272	6.7718	neg	Dihydroergotamine	HMDB0014465	Alkaloids and derivatives	Ergoline and derivatives	Lysergic acids and derivatives	M-H	C33H37N5O5	39	4.29	-0.33763	1.12338	0.00023566	0.00107056	2.25997	4.7898	76421.7	15955.1	50579.1	82277.8	92800.2	37239.3	75683.9	42268.8	52523.1	55459.9	152551	122834	29868.2	4335.84	3421.75	20660.2	6904.53	34339.4	9905.99	23871.2	10288.7
9.11_499.2694n	500.277	9.114	pos	LysoPE(20:5(5Z,8Z,11Z,14Z,17Z)/0:0)	HMDB0011519	Lipids and lipid-like molecules	Glycerophospholipids	Glycerophosphoethanolamines	M+H, M+Na	C25H42NO7P	55.2	83.6	-1.04293	1.35692	0.000214854	0.000992803	2.24146	4.72876	115295	24381.6	67954.1	109524	77846.3	132064	224827	57617.2	79479.3	75145.9	135087	193403	48860.4	25719.3	47115.6	17751.1	25474.8	19153.9	7938.24	17007.4	10413.6
1.82_411.1092m/z	411.109	1.81625	neg	Eugenitol	HMDB0029466	Organoheterocyclic compounds	Benzopyrans	1-benzopyrans	2M-H	C11H10O4	39	1.19	1.55109	1.07622	0.000388282	0.00162099	2.23519	4.70825	66694.3	14165.4	46870.5	44431.7	124512	20221.1	29874.9	63826.9	93462.6	87094	44572.9	112076	16897	12465.1	12384.8	14181.2	14033.1	16294.4	13134.6	12808.9	15289.6
0.69_219.0447m/z	219.045	0.691617	neg	N-Acetyl-S-(N-methylcarbamoyl)cysteine	HMDB0041942	Organic acids and derivatives	Carboxylic acids and derivatives	Amino acids, peptides, and analogues	M-H	C7H12N2O4S	37.8	4.85	0.864093	1.87494	1.61333e-07	3.53709e-06	2.18654	4.55211	172726	37944.2	124389	147584	235574	109062	161311	188254	243421	196767	123655	197244	46219.2	35106.6	32365.6	40801.3	23922.2	37439.7	44917	39821.5	40904.6
10.61_428.3729m/z	428.373	10.6091	pos	Stearoylcarnitine	HMDB0000848	Lipids and lipid-like molecules	Fatty Acyls	Fatty acid esters	M+H	C25H49NO4	55.1	82.3	-1.24186	2.30782	0.0007728	0.00282442	2.16368	4.48055	383513	85595.1	205530	323341	334579	695323	625672	160293	217632	167547	410364	694852	144008	59561.2	150501	95591.3	65534.5	83245.4	24201.3	88504.8	59208.4
7.43_404.1885m/z	404.189	7.42727	pos	Latrunculin A	64706	Unclassified	Unclassified	Unclassified	M+H-H2O	C22H31NO5S	48.3	50	-1.08637	1.14469	5.47197e-05	0.000329611	2.151	4.44135	76092.1	17132.6	86362.9	70586.6	19551.4	51281.8	75116.7	50634.6	130060	85982	115023	76322	26510.6	20750.7	7939.3	20779.6	21910	31445.5	13898.6	4106.42	6853.01
11.09_581.3079m/z	581.308	11.093	pos	1-Oleoylglycerophosphoinositol	HMDB0061693	Lipids and lipid-like molecules	Glycerophospholipids	Glycerophosphoinositols	M+H-H2O	C27H51O12P	37.6	0	-0.999008	1.1653	0.000290565	0.00127408	2.14711	4.42938	82982.2	18734.5	80631.3	113385	26231.9	63881.3	110351	54264.2	93224.1	62857.3	54575.2	170420	17489.1	25572	7.93017e-07	6350.64	26064.6	17147.6	17655.6	40465.2	17865.8
1.77_413.1232m/z	413.123	1.76648	pos	Vinyl caffeate	HMDB0029775	Phenylpropanoids and polyketides	Cinnamic acids and derivatives	Hydroxycinnamic acids and derivatives	2M+H	C11H10O4	39.4	1.43	0.287117	1.94791	0.000445303	0.00180981	2.13465	4.39129	220267	50160	181377	175517	349381	58629.6	83466.4	162242	333815	332850	151062	374332	74411.3	51394.9	31690.5	53680.3	38787.6	58758.3	42165.7	46325.4	54225.8
11.62_607.3843n	608.392	11.6197	pos	PON-PE	LMGP20020028	Lipids and lipid-like molecules	Glycerophospholipids	Oxidized glycerophospholipids	M+H, M+Na	C30H58NO9P	45.8	35.2	-1.0486	2.75394	0.00500265	0.0127376	2.12596	4.36492	614464	140773	897628	554160	861588	448577	1.36204e+06	55972.8	340477	123830	1.09436e+06	405996	64522.5	74006	168691	69754.2	52693.5	148806	88176.1	177578	422731
1.13_555.1070m/z	555.107	1.12517	neg	4-Hydroxyfurano[2'',3'':6,7]aurone	LMPK12130024	Lipids and lipid-like molecules	Polyketides	Flavonoids	2M-H	C17H10O4	38.4	0	-2.80834	1.09842	0.000165831	0.00081124	2.11861	4.34276	71046.9	16359.8	70914.3	44980.2	93162.6	39579.4	30770	45362.8	91213.4	135589	98123.2	60773.7	29512	16640.6	13946.2	16654.4	23515.9	24565.7	4737.4	4241.09	13425.4
1.12_617.1053m/z	617.105	1.12177	pos	Procyanidin B3	HMDB0033974	Phenylpropanoids and polyketides	Flavonoids	Biflavonoids and polyflavonoids	M+K	C30H26O12	35.3	0	-0.536418	1.8466	4.80762e-05	0.000296472	2.11281	4.32532	193475	44730.7	212122	278908	131026	71239.4	230763	199574	137171	301622	183192	189129	4189.64	9160.07	34936.4	80124	128609	106043	24538.7	6029.71	8945.8
6.78_515.2912n	498.288	6.78442	pos	Taurocholic acid	34542	Lipids and lipid-like molecules	Steroids and steroid derivatives	Bile acids, alcohols and derivatives	M+H-H2O, M+H, M+NH4, M+Na	C26H45NO7S	57	94.1	-0.832722	3.29109	0.00121743	0.00405624	2.08665	4.24761	739224	174033	512723	850126	898074	306564	625656	321586	477799	602234	1.67517e+06	1.12231e+06	343971	56127.7	34225.7	254578	62076.1	378013	90633.9	245819	100854
11.32_581.3072m/z	581.307	11.3206	pos	Oxamniquine	HMDB0015228	Organoheterocyclic compounds	Quinolines and derivatives	Nitroquinolines and derivatives	2M+Na	C14H21N3O3	39	0	2.50881	1.2728	0.000563631	0.0021768	2.02881	4.08069	115313	28258.2	66674.2	88874.9	142310	204370	125240	49375.5	87545.5	85214.7	76318.2	227209	17814.9	17500.4	54093.7	33281.7	36420.6	9998.23	12621.4	52461.7	20131.6
12.89_333.2782m/z	333.278	12.8949	pos	Adrenic Acid	LMFA01030178	Lipids and lipid-like molecules	Fatty Acyls	Fatty Acids and Conjugates	M+H	C22H36O2	53.7	74.9	-1.86663	1.2542	0.00423821	0.0111396	1.97206	3.92327	131497	33517.2	95106.3	109971	92557.4	205187	209551	61263.1	65720	52152.2	100822	322642	37093.5	37688	79610.7	26345.7	32056.5	21240.6	13087.5	39770.5	14762.2
11.24_400.3335n	383.33	11.2353	pos	Calcidiol	HMDB0003550	Lipids and lipid-like molecules	Steroids and steroid derivatives	Vitamin D and derivatives	M+H-H2O, M+H	C27H44O2	54.6	83.3	-1.64878	1.14304	0.000449619	0.0018235	1.9559	3.87957	89482.8	23065.2	68504.9	98641.2	35435.5	91617.3	112472	63073.2	52677.6	86569.6	86101.5	199736	26067.4	24596.6	28451.7	37438.2	31826.1	12230.4	22676.3	14963.8	9335.95
9.90_522.2823m/z	522.282	9.89997	pos	PG(18:4(6Z,9Z,12Z,15Z)/0:0)	LMGP04050021	Lipids and lipid-like molecules	Glycerophospholipids	Glycerophosphoglycerols	M+NH4	C24H41O9P	38.2	0	-0.765308	1.03995	8.95995e-05	0.000492031	1.94992	3.86353	69479.3	17983.4	64603.7	59938.4	61224.7	63576.8	52262.5	30388.8	42514.2	86435.5	122217	111631	32490.2	9323.92	21862.5	22456.5	14184.3	28091.1	10192.1	15357	7892.77
10.27_431.3151m/z	431.315	10.2689	pos	7alpha-Hydroxy-3-oxo-4-cholestenoate	HMDB0012458	Lipids and lipid-like molecules	Steroids and steroid derivatives	Bile acids, alcohols and derivatives	M+H	C27H42O4	54.5	79.1	-1.06666	1.95815	3.7089e-06	3.73084e-05	1.92751	3.80398	214976	56513.5	214951	351478	236724	179142	90177.4	157822	260492	225853	225287	207832	67227	48963.2	62677.4	62627.6	28782.1	101394	46708.3	49449.8	40792
6.12_515.2912n	516.299	6.12065	pos	Taurallocholic acid	HMDB0000922	Lipids and lipid-like molecules	Steroids and steroid derivatives	Bile acids, alcohols and derivatives	M+H-H2O, M+NH4, M+Na, M+H	C26H45NO7S	53.2	76.7	-0.899843	2.17041	0.00304059	0.00849113	1.81655	3.52237	367154	104235	257024	349848	404364	165276	336265	146941	267555	331003	900151	513118	209322	29907.6	26167.5	125464	39326.2	219236	58988.7	156689	73015.3
0.79_188.0482n	187.041	0.78905	neg	Isoplumbagin	HMDB0035291	Benzenoids	Naphthalenes	Naphthoquinones	M-H, M+FA-H	C11H8O3	39	12.1	4.71722	2.44281	2.50312e-07	4.85018e-06	1.80743	3.50019	333455	95267.9	285361	292699	521244	305598	324275	369560	335020	400401	235819	264577	153713	97791.5	75828.5	44610.2	73037	95047.1	116947	102724	97712.9
10.65_465.3216n	466.329	10.6521	pos	PE(O-18:1(9Z)/0:0)	LMGP02060004	Lipids and lipid-like molecules	Glycerophospholipids	Glycerophosphoethanolamines	M+H, M+Na	C23H48NO6P	55.2	80.2	-0.604818	2.60713	0.00093122	0.00326607	1.76716	3.40384	505516	148513	263919	439423	363290	700717	888210	210911	488846	337189	403557	959095	293289	145939	193265	110218	207798	119422	55200.2	136290	75200.7
11.43_549.3789n	550.386	11.4342	pos	LysoPC(20:1(11Z))	HMDB0010391	Lipids and lipid-like molecules	Glycerophospholipids	Glycerophosphocholines	M+H, M+Na	C28H56NO7P	57.4	92.1	-1.00745	2.35209	0.000877955	0.00312318	1.73096	3.31948	424898	128001	250126	502396	411163	514539	665436	158248	223455	200095	522445	801082	196084	142879	199823	114655	148782	85018.6	37906	137997	88868.1
2.52_382.1004m/z	382.1	2.51583	neg	(S)-malyl N-acetyl-alpha-D-glucosaminide	LMFA13010059	Lipids and lipid-like molecules	Fatty Acyls	Fatty acyl glycosides	M+FA-H	C12H19NO10	41.2	13.9	3.72512	2.43671	3.39617e-06	3.48293e-05	1.68987	3.22627	340483	105535	264891	284063	476590	241082	313259	314832	519870	429765	215284	345192	123512	107474	69153.2	93035.7	104212	138624	106930	96702.6	110167
17.21_369.3510m/z	369.351	17.2148	pos	Cholesterol	LMST01010001	Lipids and lipid-like molecules	Sterol Lipids	Sterols	M+H-H2O	C27H46O	38.8	0	-1.46906	4.62898	0.00265763	0.00759535	1.68878	3.22383	1.86255e+06	577745	1.01679e+06	1.56688e+06	1.4399e+06	3.00444e+06	3.02193e+06	527127	1.01868e+06	1.1284e+06	2.27857e+06	3.62282e+06	682105	466520	1.37509e+06	457319	569159	440466	298298	565589	345162
8.53_315.2769n	298.274	8.53218	pos	4-hydroxy-8cis-sphingenine	LMSP01080009	Lipids and lipid-like molecules	Sphingolipids	Sphingoid bases	M+H-H2O, M+H	C18H37NO3	38.8	0	-1.3123	1.17009	0.000900248	0.00318484	1.68565	3.21686	106327	33052.9	59148.1	95884.9	92789.9	135713	155587	48413.7	67927	67107	134821	205875	87560.8	28777.4	43280.5	24004.2	31925.5	24571.6	14907.9	27703.7	14744.6
4.71_475.1523m/z	475.152	4.70843	pos	(R)-Bitalin A	HMDB0040358	Benzenoids	Benzene and substituted derivatives	Acetophenones	2M+K	C13H14O3	38.1	0	1.19535	1.09856	3.01813e-05	0.000201542	1.66608	3.1735	77607.4	24454.8	74926.4	100373	50832	35465.2	74394	67241.4	86797.8	70243.3	133402	82398.8	33700.5	35719.5	6253.86	28022.8	13814.2	27327.6	24864.8	18292.6	32097.5
2.50_384.1144m/z	384.114	2.50163	pos	Succinyladenosine	HMDB0000912	Nucleosides, nucleotides, and analogues	Purine nucleosides	Unclassified	M+H	C14H17N5O8	53.5	74.6	-1.61197	3.75557	9.2406e-06	7.68219e-05	1.60683	3.04582	838353	275247	804545	825278	1.03208e+06	515338	652970	654334	1.27556e+06	1.21824e+06	568536	836636	389120	299394	150058	240444	235199	358949	273787	259899	270375
11.76_302.2242n	303.231	11.7613	pos	Eicosapentaenoic acid	HMDB0001999	Lipids and lipid-like molecules	Fatty Acyls	Fatty acids and conjugates	M+H-H2O, M+H	C20H30O2	55	80.8	-1.39786	1.47158	0.000209452	0.000974855	1.58803	3.00638	159466	53042.6	166777	140192	155396	160837	235466	90427.9	113711	110856	115395	305607	88057	47132.9	73880.4	42517.4	50734.4	44678	34599	62054.3	33730.2
3.38_276.1802m/z	276.18	3.37723	pos	Hydroxyhexanoycarnitine	LMFA07070072	Lipids and lipid-like molecules	Fatty Acyls	Fatty esters	M+H	C13H25NO5	51.1	60.7	-1.23069	1.25415	5.55464e-05	0.000333663	1.5752	2.97976	111548	37435	86135.2	61126.5	153371	168883	120539	96967.9	117006	168211	76776.2	66459.1	38146.8	26200.1	29700.1	46387.8	27900.7	51735.6	41977.5	37756.4	37110.2
0.73_277.0330m/z	277.033	0.73325	neg	N-Acetyldjenkolic acid	HMDB0029421	Organic acids and derivatives	Carboxylic acids and derivatives	Amino acids, peptides, and analogues	M-H2O-H	C9H16N2O5S2	35.4	0	2.48306	1.00455	3.86691e-06	3.85624e-05	1.57399	2.97728	63924.3	21470.7	45650.6	51894.6	79666.6	39040.8	53922.5	63544.2	60793.7	64386.9	99867.2	80476.3	30162.1	21855.2	24271.5	17321.8	14113.9	19129.9	28315.6	16710.3	21356.5
10.74_507.3685n	508.376	10.7374	pos	LysoPC(P-18:0)	HMDB0013122	Lipids and lipid-like molecules	Glycerophospholipids	Glycerophosphocholines	M+H, M+Na	C26H54NO6P	42.5	18.9	-0.70673	2.04402	0.000761305	0.00279065	1.56746	2.96382	355029	119788	212191	295992	325656	610443	522128	157306	243030	194388	436611	552547	186599	97823.3	214469	98859.1	151965	102750	36726.2	120656	68240.9
3.79_174.0218m/z	174.022	3.79213	pos	Piloty's Acid	44964	Unclassified	Unclassified	Unclassified	M+H	C6H7NO3S	38.6	0.15	-0.803169	1.38231	0.00165456	0.00521699	1.56133	2.95126	139552	47285.6	113907	234384	111659	59146.8	76209.4	89251.7	132596	291413	171425	115531	44671.3	37325.9	36517.4	60333.1	30576.6	53782.6	48978.3	47778.2	65606.6
11.78_538.3862m/z	538.386	11.7755	pos	LysoPA(24:1(15Z)/0:0)	HMDB0114757	Lipids and lipid-like molecules	Glycerophospholipids	Glycerophosphates	M+NH4	C27H53O7P	38.4	0	-0.903624	1.01138	0.0119412	0.0261735	1.55904	2.94659	111591	37871.3	59110.3	101461	70659.3	184961	237301	30233.2	40700.7	40366.6	184054	167065	61155.9	38316.1	84615.9	18186.4	42312.8	28812.1	10626.9	41699.1	15116.8
1.44_218.1384m/z	218.138	1.44065	pos	(±)-Propionylcarnitine	85176	Unclassified	Unclassified	Unclassified	M+H	C10H19NO4	52.3	65.7	-1.45855	3.84669	4.67168e-06	4.45635e-05	1.54676	2.9216	886648	303481	661904	1.08494e+06	1.03129e+06	387512	805453	805319	905442	1.24403e+06	831795	1.10879e+06	364383	414600	159914	380593	247079	446588	240870	250204	227095
10.82_605.3686n	606.376	10.8233	pos	OOB-PC	LMGP20010025	Lipids and lipid-like molecules	Glycerophospholipids	Oxidized glycerophospholipids	M+H, M+Na	C30H56NO9P	40.4	12.4	-1.04837	1.58016	0.0433994	0.0753427	1.51086	2.84981	320498	112463	422756	199759	451408	215057	629520	23063.1	183082	56781.3	828377	195179	37756.5	50781.3	131427	46797	35403.2	91785.4	59735.8	115605	442877
10.58_594.3428m/z	594.343	10.5806	pos	Arginyl-Asparagine	HMDB0028704	Organic acids and derivatives	Carboxylic acids and derivatives	Amino acids, peptides, and analogues	2M+NH4	C10H20N6O4	36.6	0	-0.482373	1.15264	0.0464103	0.0796169	1.46151	2.75397	177104	64308.7	250548	135482	166289	70769.9	273145	18600.9	48940.3	134286	544883	128097	50451.2	49217.3	86666.3	38772.6	43053.9	44788.1	38050	62921.5	164858
9.60_600.2037m/z	600.204	9.60382	neg	2-amino-4-({1-[(carboxymethyl)-C-hydroxycarbonimidoyl]-2-[(2-{3,5-dihydroxy-4-[(1E)-3-methylbut-1-en-1-yl]phenyl}-2-hydroxy-1-(4-hydroxyphenyl)ethyl)sulfanyl]ethyl}-C-hydroxycarbonimidoyl)butanoic acid	HMDB0129016	Organic acids and derivatives	Carboxylic acids and derivatives	Amino acids, peptides, and analogues	M-H2O-H	C29H37N3O10S	44.4	32.5	2.58454	1.02997	0.000481677	0.00192471	1.43122	2.69675	90994.5	33742.3	63539.9	77195.2	72182.2	108740	133770	58768.1	56498	62344.6	148292	128615	49499.6	31651.7	76988.3	24096.2	39975.3	26304.2	13988	23547.2	17630.1
12.96_381.1737m/z	381.174	12.9588	neg	S-Japonin	HMDB0035802	Lipids and lipid-like molecules	Prenol lipids	Sesquiterpenoids	M+FA-H	C19H28O3S	39.6	7.19	-1.16576	1.6435	0.000394372	0.00164088	1.42469	2.68458	221110	82363.1	163415	300231	148955	257949	245659	158023	142000	144343	242266	408259	98731	106018	154952	46725.8	100996	53093.5	30228.3	90446.8	60077.5
9.06_714.4929m/z	714.493	9.05688	pos	11b,21-Dihydroxy-5b-pregnane-3,20-dione	LMST02030188	Lipids and lipid-like molecules	Sterol Lipids	Steroids	2M+NH4	C21H32O4	35.7	0.33	-1.50351	2.76893	0.00744812	0.0176818	1.41508	2.66674	817024	306375	544300	728389	526724	1.30124e+06	1.25985e+06	265763	418560	425298	1.0112e+06	1.68891e+06	578016	333851	601322	231350	368556	197048	86722.6	218875	141636
9.95_502.2943m/z	502.294	9.94557	neg	PE(0:0/20:3(8Z,11Z,14Z))	LMGP02050050	Lipids and lipid-like molecules	Glycerophospholipids	Glycerophosphoethanolamines	M-H	C25H46NO7P	53	69.6	0.689376	1.5527	0.000552104	0.00214436	1.41202	2.66109	208390	78310	157572	227086	173489	267086	306369	130554	104457	111120	258040	348121	128765	82904	132331	57014.1	102352	61245.4	29532.7	60212.2	50432.7
11.16_508.3395m/z	508.339	11.1643	pos	PA(22:2(13Z,16Z)/0:0)	LMGP10050030	Lipids and lipid-like molecules	Glycerophospholipids	Glycerophosphates	M+NH4	C25H47O7P	38.3	0	-0.632684	1.11523	4.9421e-05	0.000303169	1.39789	2.63515	95827.4	36365	79535.5	88508.5	92265.7	111327	113907	63794.7	63580.2	73183.9	106356	165815	47260.8	35885.6	60185.5	37721.9	44135.7	24418.3	17238.8	31000.7	29438.1
1.14_499.0793m/z	499.079	1.13565	pos	Visnagin	LMPK13110003	Lipids and lipid-like molecules	Polyketides	Aromatic polyketides	2M+K	C13H10O4	38.5	0	0.615353	2.29088	0.000484289	0.00193426	1.38826	2.61763	400777	153107	460293	548941	270243	133697	473396	467774	298760	596171	386668	371827	65465	26270.2	129917	196261	285018	359363	128229	97542.3	89898.1
9.97_504.3081m/z	504.308	9.97058	pos	LysoPE(0:0/20:3(11Z,14Z,17Z))	HMDB0011484	Lipids and lipid-like molecules	Glycerophospholipids	Glycerophosphoethanolamines	M+H	C25H46NO7P	55.3	79.9	-0.789427	2.76611	0.000403526	0.00166936	1.38786	2.61691	650554	248596	469470	706056	539618	808601	991894	363982	355872	415556	828741	1.02575e+06	404633	246314	422377	222125	274142	211383	105005	203646	147741
10.37_504.3084m/z	504.308	10.368	pos	LysoSM(d18:1)	HMDB0006482	Lipids and lipid-like molecules	Sphingolipids	Phosphosphingolipids	M+K	C23H50N2O5P+	39.1	0	-1.0391	1.20305	0.000780572	0.00284863	1.38138	2.60518	125150	48038.8	100977	170425	107148	137404	150313	68928.5	63225.6	75118.9	142849	235109	73711.8	50549.5	81262.9	47711.4	48234.1	45134.7	20879.8	40311.5	24553.2
10.19_502.2941m/z	502.294	10.1948	neg	LysoPE(0:0/20:3(5Z,8Z,11Z))	HMDB0011485	Lipids and lipid-like molecules	Glycerophospholipids	Glycerophosphoethanolamines	M-H	C25H46NO7P	53.2	71.2	0.396655	1.3441	0.00021402	0.000991062	1.35562	2.55906	150977	58997	112227	181469	127285	180001	206965	113221	83937.4	83104.5	178778	242783	87925.7	58945.7	100781	48438.2	69163.7	48650.9	25899.6	48322.7	42845.9
9.07_299.2821n	300.289	9.07102	pos	Sphingosine	392	Organic nitrogen compounds	Organonitrogen compounds	Amines	M+H-H2O, M+H	C18H37NO2	55.9	83.7	-1.22208	4.85072	0.00549817	0.0137351	1.34297	2.53673	2.5725e+06	1.0141e+06	1.49297e+06	2.26556e+06	1.60646e+06	4.66506e+06	4.12706e+06	1.18696e+06	1.50659e+06	1.35078e+06	2.9571e+06	4.5665e+06	1.5843e+06	1.08109e+06	1.66546e+06	845484	1.44545e+06	755428	428497	849158	472043
10.65_464.3131m/z	464.313	10.6521	pos	LysoPE(18:0/0:0)	HMDB0011130	Lipids and lipid-like molecules	Glycerophospholipids	Glycerophosphoethanolamines	M+H-H2O	C23H48NO7P	49.4	52.6	-0.917374	2.15691	0.00182101	0.00564531	1.34037	2.53216	438124	173024	248631	422788	351772	575362	584224	201897	316478	254273	577946	847867	255445	189108	283163	129744	198069	133644	73941.2	201099	93002.9
10.74_593.3685n	594.376	10.7374	pos	PC(16:0/5:0(CHO))	LMGP20010005	Lipids and lipid-like molecules	Glycerophospholipids	Oxidized glycerophospholipids	M+H, M+Na	C29H56NO9P	54.7	78.1	-1.21992	3.01085	0.0466067	0.0798984	1.32008	2.4968	1.32047e+06	528865	1.92246e+06	919360	1.73508e+06	1.09186e+06	2.58789e+06	131650	668052	238101	3.18807e+06	722184	175554	238073	681823	287348	226179	532467	324672	618053	1.67562e+06
10.20_504.3081m/z	504.308	10.198	pos	PE(18:0/0:0)	LMGP02050001	Lipids and lipid-like molecules	Glycerophospholipids	Glycerophosphoethanolamines	M+Na	C23H48NO7P	56.2	87.9	4.15118	2.33185	0.000188679	0.000900544	1.308	2.47598	463164	187063	379089	559360	410869	554025	607816	285957	254918	298911	538914	741779	256029	186741	324784	190422	192672	154398	89085.1	173313	116122
0.62_304.0619n	343.025	0.622183	pos	(5-hydroxy-7-methoxy-2,2-dimethyl-3,4-dihydro-2H-1-benzopyran-4-yl)oxidanesulfonic acid	HMDB0125817	Organoheterocyclic compounds	Benzopyrans	1-benzopyrans	M+K, 2M+K, 2M+Na, M+Na	C12H16O7S	37.6	0	0.593457	1.38349	1.95804e-05	0.000142076	1.29955	2.46152	134531	54653.8	114224	157471	186959	83438.2	80716.6	133124	184893	167913	137283	99290.6	72965.5	52692	35357.7	58690.6	50074	53500.4	58305.5	64912.4	45386.2
9.93_400.3416m/z	400.342	9.92822	pos	Palmitoyl-L-carnitine	961	Unclassified	Unclassified	Unclassified	M+H	C23H45NO4	48.8	50	-1.40627	1.7407	0.0113883	0.0252262	1.29803	2.45894	367948	149637	183500	280127	295312	509739	497322	121267	212460	190990	817986	570776	191128	139717	262462	195684	160844	137880	54185.2	138111	66721.8
17.48_599.3205m/z	599.321	17.4759	neg	2-Stearoylglycerophosphoinositol	HMDB0061704	Lipids and lipid-like molecules	Glycerophospholipids	Glycerophosphoinositols	M-H	C27H53O12P	48.7	47.8	0.570829	2.24501	0.0142868	0.0302627	1.28911	2.44377	598089	244740	187334	371926	420120	1.02248e+06	1.24649e+06	376878	491288	303631	483561	1.07719e+06	134587	173044	437623	200961	436762	264774	149244	235117	170552
0.86_194.9266m/z	194.927	0.858783	neg	Sulfate	HMDB0001448	Homogeneous non-metal compounds	Non-metal oxoanionic compounds	Non-metal sulfates	2M-H	H2O4S	37.9	0	-4.30353	1.06459	5.08056e-06	4.77121e-05	1.25502	2.3867	79561.8	33335.5	56014.4	66940.8	64334.4	60662.7	62198.9	99569.7	102439	103176	86610.8	93671	24035.7	26533.4	24788.1	26829.5	31988.8	36339.4	43643.5	34450.2	51411.1
1.13_249.0303n	294.029	1.12517	neg	Norepinephrine sulfate	HMDB0002062	Organic acids and derivatives	Organic sulfuric acids and derivatives	Arylsulfates	M-H, M+FA-H	C8H11NO6S	37.6	0	-1.68968	1.04391	0.000537115	0.00209979	1.24739	2.37412	89792.3	37821.3	57738.4	65064.3	175823	65777.2	86934.9	101720	105406	86136.4	58644.4	94679.7	59623.6	28746.3	45462.3	37869	39500.2	42092.2	33246	19414.3	34438.1
2.00_248.0231m/z	248.023	2.00305	neg	Cystathionine ketimine	HMDB0002015	Organic acids and derivatives	Carboxylic acids and derivatives	Amino acids, peptides, and analogues	M+FA-H	C7H9NO4S	50	54.1	-1.47709	1.17726	0.00337363	0.00926601	1.22332	2.33483	120432	51580.8	104714	87478.3	141996	73300.4	82843.2	58991.8	160474	259043	105037	130447	58388.3	47336.9	29638.3	40711.5	78859	81772.6	40752.9	43498.4	43269.4
10.59_506.3238m/z	506.324	10.5948	pos	LysoPE(20:2(11Z,14Z)/0:0)	HMDB0011513	Lipids and lipid-like molecules	Glycerophospholipids	Glycerophosphoethanolamines	M+H	C25H48NO7P	38	0	-0.693634	1.32757	0.00238172	0.00697817	1.2189	2.32769	183370	78777.6	146615	197388	168302	257274	277322	98285.5	98619.7	101613	155666	332616	107003	79419.1	139750	72527.7	97902.3	54492.7	25380.3	80707.6	51815.8
9.57_477.2851n	478.292	9.57457	pos	LysoPE(0:0/18:2(9Z,12Z))	HMDB0011477	Lipids and lipid-like molecules	Glycerophospholipids	Glycerophosphoethanolamines	M+H, M+Na	C23H44NO7P	55.6	85.1	-0.922299	1.67602	0.00809883	0.0189464	1.1946	2.28882	340225	148647	230818	291328	223590	418344	518624	149820	156370	232160	671233	509965	218322	131268	300134	136911	161909	127311	62784.3	130295	68886.6
11.08_597.3049m/z	597.305	11.0795	neg	PI(18:1(9Z)/0:0)	LMGP06050005	Lipids and lipid-like molecules	Glycerophospholipids	Glycerophosphoinositols	M-H	C27H51O12P	45.5	38.3	0.535542	2.43962	0.00096676	0.00336304	1.19413	2.28807	586742	256436	365905	526233	540490	895324	744981	474783	506310	359611	405523	1.04826e+06	201517	222824	438682	239373	349778	215258	157511	290863	192116
4.15_333.1325n	332.125	4.14642	neg	gamma-Glutamyltryptophan	HMDB0029160	Organic acids and derivatives	Carboxylic acids and derivatives	Amino acids, peptides, and analogues	M-H, 2M-H	C16H19N3O5	55.7	82.1	-0.0154713	1.31791	7.45772e-08	2.06271e-06	1.19119	2.28341	116965	51224	102948	121344	143984	91381.9	115025	93452.6	139920	134213	113098	114287	67168.9	52789.3	38818.1	38928.7	67065.1	67950.7	45967.5	42124.9	40202.8
11.21_523.3634n	524.371	11.2069	pos	LysoPC(18:0)	HMDB0010384	Lipids and lipid-like molecules	Glycerophospholipids	Glycerophosphocholines	M+H, M+Na, M+H-H2O	C26H54NO7P	57.6	90.4	-0.811242	14.8868	0.00240769	0.00703569	1.18169	2.26842	2.31163e+07	1.01905e+07	1.42014e+07	2.41788e+07	1.82937e+07	2.93148e+07	3.73535e+07	1.05377e+07	1.61193e+07	1.30877e+07	3.13214e+07	3.67543e+07	1.35414e+07	9.866e+06	1.9483e+07	7.3996e+06	1.12071e+07	8.18639e+06	4.12411e+06	1.05293e+07	7.37731e+06
10.71_552.3291m/z	552.329	10.709	pos	POV-PE	LMGP20020030	Lipids and lipid-like molecules	Glycerophospholipids	Oxidized glycerophospholipids	M+H	C26H50NO9P	52.6	68.4	-0.988209	1.39015	0.03641	0.0652903	1.16479	2.24201	278869	124384	290618	228484	452934	244378	564335	45180.9	152333	57675.8	544742	208014	48921	66770.4	174585	99573.9	69734	114826	82357.2	127067	335616
1.13_333.0938m/z	333.094	1.12517	neg	(S)-a-Amino-2,5-dihydro-5-oxo-4-isoxazolepropanoic acid N2-glucoside	HMDB0029404	Organic oxygen compounds	Organooxygen compounds	Carbohydrates and carbohydrate conjugates	M-H	C12H18N2O9	54.1	73.5	-0.475762	4.04317	1.2432e-07	2.99172e-06	1.1609	2.23597	1.20026e+06	536798	1.25644e+06	1.10327e+06	1.37747e+06	1.13747e+06	774419	1.46758e+06	1.38057e+06	1.41377e+06	1.12355e+06	968092	623648	608028	506203	520735	416797	581689	492319	501662	580105
17.49_369.3510m/z	369.351	17.4922	pos	Lathosterol	LMST01010089	Lipids and lipid-like molecules	Sterol Lipids	Sterols	M+H-H2O	C27H46O	38.8	0	-1.41101	4.25109	0.00388038	0.0103816	1.15856	2.23234	1.95327e+06	874987	1.47349e+06	1.97677e+06	1.02271e+06	2.26967e+06	2.77366e+06	964606	1.35477e+06	1.33912e+06	2.442e+06	3.91589e+06	1.32135e+06	1.05113e+06	1.21544e+06	664268	957237	745410	397764	922250	600031
5.43_432.1810m/z	432.181	5.43252	neg	Piscerythramine	LMPK12050157	Lipids and lipid-like molecules	Polyketides	Flavonoids	M-H2O-H	C26H29NO6	39.5	7.66	-1.47049	1.05068	0.0380314	0.0676347	1.15565	2.22784	175827	78922.5	239643	24380.1	181806	330333	421757	59525.2	158147	81654.6	126323	134699	49940.1	38436.9	76024.8	74123.7	64561	132110	63726	60986.1	150394
7.52_555.3094m/z	555.309	7.52442	pos	Pokeberrygenin	HMDB0034653	Lipids and lipid-like molecules	Prenol lipids	Triterpenoids	M+K	C31H48O6	46.2	40.4	2.19013	1.07446	1.74783e-06	2.04941e-05	1.12045	2.17414	86820.5	39933.2	88438.1	97213.1	90781	74144.4	59365.3	62012.9	92294.2	112883	88640	102433	51115	43685.1	29701.9	53646.1	41515.7	48574.5	23629.4	29393.3	38137.7
0.73_126.0219m/z	126.022	0.733317	pos	Taurine	31	Organic acids and derivatives	Organic sulfonic acids and derivatives	Organosulfonic acids and derivatives	M+H	C2H7NO3S	54	78.2	0.0159345	1.20997	0.010556	0.0236422	1.11803	2.17051	174411	80354.8	65955.7	89205.2	193761	126229	165743	417267	165495	197294	160301	162857	44166.2	42231.7	88659.4	105073	75745.8	105195	103395	80489.9	78237.9
1.52_262.1645m/z	262.165	1.5238	pos	3-hydroxyisovalerylcarnitine	LMFA07070041	Lipids and lipid-like molecules	Fatty Acyls	Fatty esters	M+H	C12H23NO5	47.1	39.8	-1.41741	3.16018	2.12321e-07	4.30148e-06	1.10507	2.1511	740718	344344	746064	678043	918269	721921	824233	561929	790746	932968	601013	631990	398518	386835	222506	362799	269956	448103	342672	351820	315890
10.38_529.3162n	530.324	10.3821	pos	LysoPE(0:0/22:4(7Z,10Z,13Z,16Z))	HMDB0011493	Lipids and lipid-like molecules	Glycerophospholipids	Glycerophosphoethanolamines	M+H, M+Na	C27H48NO7P	57.5	91	-1.12046	5.44056	0.000477772	0.00191297	1.08962	2.12818	3.05556e+06	1.43576e+06	2.47447e+06	2.48147e+06	2.35189e+06	4.10902e+06	4.31376e+06	2.32629e+06	2.01039e+06	2.42048e+06	3.52482e+06	4.54296e+06	1.64355e+06	1.29286e+06	2.77709e+06	1.3281e+06	1.90063e+06	1.29169e+06	689752	1.11168e+06	886491
1.29_478.1072m/z	478.107	1.2882	pos	Flupoxam	HMDB0041341	Organoheterocyclic compounds	Azoles	Triazoles	M+NH4	C19H14ClF5N4O2	33.8	0	1.78797	1.63321	0.00371094	0.0100226	1.07463	2.10618	257489	122254	231878	430160	253144	150951	118622	142203	310439	389703	231107	316687	214194	231138	75916.4	105462	138554	115215	100096	50625.4	69087.5
1.54_499.1158m/z	499.116	1.53767	pos	N,N'-Bis(gamma-glutamyl)cystine	HMDB0038458	Organic acids and derivatives	Carboxylic acids and derivatives	Amino acids, peptides, and analogues	M+H	C16H26N4O10S2	52.2	73	-1.09493	1.2029	0.000508664	0.0020136	1.06839	2.09709	134517	64144.6	118452	91735.8	162924	107241	170369	213295	118906	172713	55596.2	133938	58016.6	48925.9	46330.6	68485	56228.4	103366	70007.2	47379.3	78563.2
12.28_304.2395n	305.247	12.2782	pos	(-)-Cladielline	LMPR0104210003	Lipids and lipid-like molecules	Prenol lipids	Isoprenoids	M+H-H2O, M+H	C20H32O2	54.5	78.5	-2.5215	3.91095	0.00239952	0.00702068	1.0582	2.08233	1.68189e+06	807698	1.58922e+06	1.66829e+06	1.35171e+06	2.05524e+06	1.81885e+06	886639	1.25213e+06	1.23914e+06	1.49973e+06	3.458e+06	1.14503e+06	624726	963001	771266	946786	878000	466234	895661	578576
3.79_294.1217n	293.114	3.79068	neg	gamma-Glutamylphenylalanine	HMDB0000594	Organic acids and derivatives	Carboxylic acids and derivatives	Amino acids, peptides, and analogues	M-H, 2M-H, M-H2O-H	C14H18N2O5	53.9	73	0.406049	1.47597	1.02649e-07	2.62946e-06	1.05471	2.07731	160883	77448.1	132147	155700	203228	139066	161738	136505	186709	179478	155702	158558	104664	83272	51016.6	65367.7	89760.1	98619	73559.7	67164	63609.3
10.75_531.2729m/z	531.273	10.7458	neg	1-(7Z,10Z,13Z,16Z-docosatetraenoyl)-glycero-3-phosphate	HMDB0062310	Lipids and lipid-like molecules	Glycerophospholipids	Glycerophosphates	M+FA-H	C25H43O7P	46.3	36.8	0.159389	1.6376	1.04564e-05	8.50139e-05	1.05451	2.07701	232151	111772	188441	218617	192417	302553	253762	222077	238886	221967	156513	326278	135414	107038	152903	132033	113105	133761	75100.1	83710.5	72881.8
10.67_522.2838m/z	522.284	10.6671	neg	PS(18:1(9Z)/0:0)	40829	Unclassified	Unclassified	Unclassified	M-H	C24H46NO9P	56.1	85.7	0.117371	1.74298	0.00212935	0.00639211	1.0416	2.05851	334602	162546	255170	319121	217536	367189	302057	260505	278866	269435	385917	690220	172701	160337	253732	153046	204294	149790	88639.3	162851	117523
1.25_382.0731m/z	382.073	1.2467	pos	Triglochinin	HMDB0030934	Organic oxygen compounds	Organooxygen compounds	Carbohydrates and carbohydrate conjugates	M+Na	C14H17NO10	42.1	21.3	-3.9182	2.3623	0.000435084	0.00177243	1.0314	2.04401	527041	257847	453849	300969	396095	497674	377095	565645	935394	645720	471498	626471	239832	307212	217464	292414	248359	337918	248359	222497	206568
4.15_333.1320n	334.139	4.14863	pos	Glutamyltryptophan	HMDB0028830	Organic acids and derivatives	Carboxylic acids and derivatives	Amino acids, peptides, and analogues	M+H, M+Na	C16H19N3O5	54.7	79.3	-1.50477	1.99401	2.28724e-05	0.000160135	1.02699	2.03776	323227	158618	352349	400681	344033	214290	272423	207651	373809	417643	333228	316158	247844	188943	97668.6	130482	166823	209913	135044	132458	118392
10.35_522.2837m/z	522.284	10.3466	neg	PE(18:2(9Z,12Z)/0:0)	LMGP02050011	Lipids and lipid-like molecules	Glycerophospholipids	Glycerophosphoethanolamines	M+FA-H	C23H44NO7P	40.4	7.05	-0.0554534	1.26865	0.00523612	0.0132253	1.02647	2.03703	204644	100462	145876	195735	164875	320773	309161	139233	108514	119755	171267	371248	106627	84648.9	162035	95752.1	121627	97760.7	69350.4	88502.1	77853.1
1.13_395.0953m/z	395.095	1.12517	neg	4-Methyldibenzothiophene	HMDB0040164	Organoheterocyclic compounds	Benzothiophenes	Dibenzothiophenes	2M-H	C13H10S	37.6	0	4.94182	2.12558	2.62551e-05	0.000179188	1.02333	2.0326	387728	190754	416871	401202	452803	318753	194650	404502	439161	556800	386867	305668	181754	218016	172412	204817	172702	273571	169137	155066	169311
2.02_309.1092m/z	309.109	2.0197	neg	Phenylacetylglutamine	HMDB0006344	Organic acids and derivatives	Carboxylic acids and derivatives	Amino acids, peptides, and analogues	M+FA-H	C13H16N2O4	48.4	44.5	-0.211309	1.33513	8.15944e-07	1.11941e-05	0.993543	1.99107	139721	70173.7	115814	132507	182286	118577	142256	112030	166965	152307	122386	152079	94976.5	73247.3	51729.4	57992.4	81842.8	87900.8	66191	61399.8	56283.5
3.55_260.1371n	259.13	3.55225	neg	gamma-Glutamylisoleucine	HMDB0011170	Organic acids and derivatives	Carboxylic acids and derivatives	Amino acids, peptides, and analogues	M-H, 2M-H, M-H2O-H	C11H20N2O5	51.8	60.9	-0.445928	1.63748	3.69699e-06	3.72319e-05	0.978823	1.97086	214418	108794	170088	204965	284298	159848	210420	173828	266381	244880	201217	228259	137146	116706	75697.2	86591.8	125871	142930	107008	97746.3	89453.9
6.36_370.2354n	369.228	6.35828	neg	6-Keto-PGF1α	2558	Unclassified	Unclassified	Unclassified	M-H, M+FA-H, 2M-H	C20H34O6	52.4	65.6	-0.260696	1.08283	0.00891183	0.0205439	0.976991	1.96836	138377	70301	145332	147123	220742	85170.4	90856.8	71715.2	81165.5	214340	194213	133115	78381.2	32472.9	43495.7	57009.3	79331.8	169781	51632.1	85421.3	35183.5
11.36_507.3321n	508.339	11.3631	pos	LysoPE(20:1(11Z)/0:0)	HMDB0011512	Lipids and lipid-like molecules	Glycerophospholipids	Glycerophosphoethanolamines	M+H, M+Na	C25H50NO7P	55	81.7	-0.776868	1.01801	0.018373	0.0371827	0.967606	1.95559	155171	79347.1	81937.7	175140	141465	219904	210363	68529.7	73461.1	78952.6	192608	309346	99346.8	83213.2	148498	66056.3	90253	45789.4	28112.7	91510.4	61344.3
6.36_370.2350n	353.232	6.36452	pos	TXB2	422	Lipids and lipid-like molecules	Fatty Acyls	Eicosanoids	M+H-H2O, M+NH4, M+Na, M+K, 2M+Na	C20H34O6	54.2	76.4	-1.32826	1.35276	0.0193683	0.0388711	0.956675	1.94083	238485	122878	283380	289525	354316	122589	144198	96494.9	132726	387441	372143	202036	155422	63464.6	64779	95179.4	118654	303821	87066.6	159329	58184.3
0.72_162.1122m/z	162.112	0.71945	pos	L-Carnitine	34532	Organic nitrogen compounds	Organonitrogen compounds	Quaternary ammonium salts	M+H	C7H15NO3	57	88.5	-1.48795	4.67208	5.72585e-05	0.000342524	0.941993	1.92118	1.94607e+06	1.01295e+06	1.41828e+06	2.00847e+06	2.48895e+06	1.11206e+06	1.69412e+06	2.29884e+06	1.95951e+06	1.97694e+06	1.66013e+06	2.84341e+06	1.21289e+06	1.19417e+06	807733	924405	938651	990424	1.04124e+06	1.05605e+06	951029
0.72_203.1500m/z	203.15	0.71945	pos	Asymmetric dimethylarginine	HMDB0001539	Organic acids and derivatives	Carboxylic acids and derivatives	Amino acids, peptides, and analogues	M+H	C8H18N4O2	38.6	0	-1.18084	1.12515	0.00198642	0.00604466	0.936928	1.91445	160866	84027.6	159027	110118	238427	184431	188884	177060	109431	135081	188245	117960	53113.5	57074.1	49129.9	60037.6	104220	101760	57710.8	204396	68806.5
11.44_320.2350n	319.228	11.443	neg	3R-HETE	LMFA03060023	Lipids and lipid-like molecules	Fatty Acyls	Eicosanoids	M-H, 2M-H	C20H32O3	44.6	26.4	-0.393682	2.55292	0.00325066	0.00897229	0.92861	1.90344	792851	416535	831966	969481	377844	725983	1.21555e+06	903051	472313	891298	381563	1.15946e+06	382818	335339	492574	658247	520012	492915	399447	266055	201412
10.40_524.2978m/z	524.298	10.3963	pos	1-Oleoylglycerophosphoserine	HMDB0061694	Lipids and lipid-like molecules	Glycerophospholipids	Glycerophosphoserines	M+H	C24H46NO9P	38.5	0	-0.906085	1.93822	0.00339794	0.00931801	0.924333	1.89781	490050	258219	395745	543434	364112	693280	709303	359606	260599	326590	426448	821386	287772	230079	412275	229354	332372	261032	189009	217025	165055
3.81_294.1213n	295.129	3.80737	pos	Tyrosyl-Hydroxyproline	HMDB0029106	Organic acids and derivatives	Carboxylic acids and derivatives	Amino acids, peptides, and analogues	M+H, M+Na	C14H18N2O5	55.8	83.2	-1.01141	2.33693	3.00687e-05	0.000201003	0.922403	1.89527	480275	253407	493525	542876	535431	347884	436100	316771	572921	624112	478080	455049	405583	291125	141316	211689	238575	321775	233147	240585	196869
2.06_311.1232m/z	311.123	2.05675	pos	gamma-Glutamyltyrosine	HMDB0011741	Organic acids and derivatives	Carboxylic acids and derivatives	Amino acids, peptides, and analogues	M+H	C14H18N2O6	49.1	52.4	-1.93671	2.07999	4.35684e-05	0.000272963	0.921017	1.89345	380261	200830	388774	435436	421856	262244	347309	245092	465908	473543	346179	416273	324282	236423	115464	161150	196692	253911	180868	179274	159405
0.62_248.9602m/z	248.96	0.6217	neg	5-(4-Chloro-3-hydroxy-1-butynyl)-2,2'-bithiophene	HMDB0033269	Organoheterocyclic compounds	Bi- and oligothiophenes	Unclassified	M-H2O-H	C12H9ClOS2	36.9	22.4	-1.044	2.00736	1.57255e-06	1.88337e-05	0.878451	1.8384	365465	198795	310245	446971	377651	275462	274129	429579	362723	369863	463125	344898	228358	182303	210232	208662	184162	175938	221334	176017	202148
1.37_217.1180m/z	217.118	1.3713	pos	2-Acetyl-1,5,6,7-tetrahydro-6-hydroxy-7-(hydroxymethyl)-4H-azepine-4-one	HMDB0035177	Organoheterocyclic compounds	Azepines	Unclassified	M+NH4	C9H13NO4	48.7	49.8	-1.64238	1.09729	0.000465846	0.00187398	0.864718	1.82098	125434	68882.4	124017	114852	72007.2	129798	128009	110371	176030	180775	72992.5	145484	69398.5	57467.6	47332.8	75105.7	84182.3	94668.1	74925.8	54954.5	61906.2
11.19_636.3498m/z	636.35	11.1936	neg	Allodesmosine	HMDB0040704	Organic acids and derivatives	Carboxylic acids and derivatives	Pentacarboxylic acids and derivatives	M-H2O-H	C30H51N6O10+	43.9	27.7	1.51284	1.24957	0.00472649	0.0121721	0.853471	1.80684	217884	120588	141077	247407	176087	307187	271563	147643	171128	141856	225471	349420	136981	127335	237146	77901.7	146779	84291.4	54012.3	121284	99562.8
10.65_554.3462m/z	554.346	10.6519	neg	LysoPC(17:0)	HMDB0012108	Lipids and lipid-like molecules	Glycerophospholipids	Glycerophosphocholines	M+FA-H	C25H52NO7P	54.6	74.5	-0.316319	2.17147	0.0369191	0.066012	0.833767	1.78233	937678	526096	648009	992238	575202	1.42578e+06	1.32038e+06	714769	524830	444905	1.07552e+06	1.65515e+06	540900	497220	1.41192e+06	375942	668224	299988	195296	483971	261397
11.46_465.3215n	466.329	11.4627	pos	PE(P-18:0/0:0)	LMGP02070002	Lipids and lipid-like molecules	Glycerophospholipids	Glycerophosphoethanolamines	M+H, M+Na	C23H48NO6P	48	46.9	-0.874543	1.11988	0.0475113	0.0812325	0.818961	1.76413	257295	145847	143333	218722	219326	387258	369398	79167.2	131105	148755	395043	480840	173898	137629	306995	89294	178781	103029	63851.5	180808	78340.2
1.15_357.1051m/z	357.105	1.15305	neg	Serotinose	HMDB0029897	Organic oxygen compounds	Organooxygen compounds	Carbohydrates and carbohydrate conjugates	M+FA-H	C11H20O10	47	43.7	3.9562	1.05591	6.73562e-06	5.96573e-05	0.812743	1.75655	117697	67004.7	122716	96899	117780	153711	119687	130274	126774	116512	85591.3	107026	101183	78760.4	51455.4	53738	55005.2	70981.4	66866.7	63092.7	61960.3
9.38_451.2694n	452.277	9.37957	pos	LysoPE(16:1(9Z)/0:0)	HMDB0011504	Lipids and lipid-like molecules	Glycerophospholipids	Glycerophosphoethanolamines	M+H, M+Na	C21H42NO7P	54.5	78.5	-0.986796	1.04567	0.0324866	0.059573	0.769626	1.70483	239556	140516	196081	180948	192156	404052	394760	119861	117916	125518	324651	339617	152848	131803	265249	124683	183510	105969	60208.2	145051	95324.4
10.36_479.3012n	478.294	10.3612	neg	PE(18:1(9Z)/0:0)	40778	Unclassified	Unclassified	Unclassified	M-H, 2M-H	C23H46NO7P	58.7	95.1	0.0238286	3.04596	0.0198048	0.0395139	0.758833	1.69212	1.71555e+06	1.01385e+06	1.18918e+06	1.62338e+06	1.46298e+06	2.38392e+06	2.33203e+06	1.07597e+06	1.102e+06	887228	1.97814e+06	3.12069e+06	1.20309e+06	1.10302e+06	1.72875e+06	721674	1.43551e+06	692996	438121	1.01508e+06	786379
0.76_160.1330m/z	160.133	0.761033	pos	METHACHOLINE	43545	Organic nitrogen compounds	Organonitrogen compounds	Quaternary ammonium salts	M+H	C8H17NO2	54.2	74.1	-1.41959	4.63727	0.00400614	0.0106328	0.74456	1.67546	2.85153e+06	1.70193e+06	2.7306e+06	1.80216e+06	1.62254e+06	2.02905e+06	3.52418e+06	2.62247e+06	4.3499e+06	3.86647e+06	3.13823e+06	2.8297e+06	1.76023e+06	1.88498e+06	1.05894e+06	1.56978e+06	1.34472e+06	2.05037e+06	2.92164e+06	1.25025e+06	1.47652e+06
1.13_151.0250m/z	151.025	1.12517	neg	Glycolic acid	HMDB0000115	Organic acids and derivatives	Hydroxy acids and derivatives	Alpha hydroxy acids and derivatives	2M-H	C2H4O3	40.3	4.11	1.065	4.25875	3.61725e-08	1.23151e-06	0.739442	1.66953	1.76196e+06	1.05536e+06	1.77051e+06	1.95823e+06	1.92553e+06	1.55118e+06	1.36547e+06	1.80325e+06	1.78849e+06	2.04083e+06	1.7879e+06	1.62821e+06	1.15346e+06	1.16605e+06	1.00841e+06	1.05816e+06	966462	1.22255e+06	1.01885e+06	910122	994195
11.60_557.2886m/z	557.289	11.6037	neg	OHOHA-PA	LMGP20070027	Lipids and lipid-like molecules	Glycerophospholipids	Oxidized glycerophospholipids	M-H2O-H	C28H49O10P	39.5	0.597	0.1035	2.57156	0.0216528	0.0425258	0.737694	1.66751	1.27509e+06	764668	733018	1.25625e+06	878907	2.39192e+06	1.52467e+06	1.03252e+06	1.18677e+06	1.12466e+06	617905	2.00427e+06	826118	820902	1.20665e+06	872147	912769	671984	451706	704927	414805
10.52_529.3165n	530.324	10.5237	pos	LysoPE(22:4(7Z,10Z,13Z,16Z)/0:0)	HMDB0011523	Lipids and lipid-like molecules	Glycerophospholipids	Glycerophosphoethanolamines	M+H, M+Na	C27H48NO7P	56.5	87.6	-0.713214	1.62486	0.0356124	0.0641187	0.726445	1.65456	544128	328866	453533	471859	382522	737829	728010	290683	312704	371328	562184	1.13062e+06	441077	317158	557356	284764	380262	320114	162005	287772	209287
10.67_555.2729m/z	555.273	10.6671	neg	OKOHA-PA	LMGP20070025	Lipids and lipid-like molecules	Glycerophospholipids	Oxidized glycerophospholipids	M-H2O-H	C28H47O10P	43.6	21	0.106696	2.73384	0.000991233	0.00343387	0.719594	1.64672	993075	603063	780680	1.06129e+06	590297	1.24677e+06	1.04313e+06	1.02281e+06	1.31693e+06	1.06411e+06	583485	1.22123e+06	710184	612609	804517	719178	644451	641745	391734	517084	386063
1.70_365.1352m/z	365.135	1.69742	neg	Semilepidinoside B	HMDB0033108	Organic oxygen compounds	Organooxygen compounds	Carbohydrates and carbohydrate conjugates	M-H	C17H22N2O7	50.5	57.4	-0.647448	1.5862	9.25644e-07	1.23671e-05	0.719352	1.64644	254982	154868	235023	221978	295238	244919	250436	229708	295868	294341	210206	272099	163841	167079	108027	158412	158306	197999	165602	131981	142568
0.72_120.1020m/z	120.102	0.71945	pos	Isovaleric acid	HMDB0000718	Lipids and lipid-like molecules	Fatty Acyls	Fatty acids and conjugates	M+NH4	C5H10O2	50.9	57.1	0.783854	2.03081	0.00285438	0.00806601	0.696931	1.62105	539314	332693	541055	725404	391270	317525	392329	564265	514078	874803	513092	559316	400900	246646	216973	420447	292174	403349	351574	306698	355479
9.60_500.2785m/z	500.278	9.60382	neg	PE(20:4(5Z,8Z,11Z,14Z)/0:0)	LMGP02050009	Lipids and lipid-like molecules	Glycerophospholipids	Glycerophosphoethanolamines	M-H	C25H44NO7P	51.9	61.8	0.406319	5.64745	0.00581668	0.014394	0.69257	1.61616	5.52344e+06	3.41763e+06	4.49909e+06	4.42956e+06	4.58381e+06	6.35378e+06	7.38642e+06	3.9867e+06	3.81476e+06	4.23505e+06	8.54844e+06	7.39674e+06	4.46163e+06	2.87293e+06	5.62434e+06	3.12277e+06	3.95102e+06	2.97433e+06	2.3497e+06	2.8712e+06	2.53075e+06
10.20_339.2888m/z	339.289	10.198	pos	Japanic acid	LMFA01170036	Lipids and lipid-like molecules	Fatty Acyls	Fatty Acids and Conjugates	M+H-H2O	C21H40O4	53.4	73.7	-1.55746	1.03593	0.00218143	0.00652024	0.687611	1.61061	177398	110143	158215	146816	149843	248187	223334	156318	129281	137256	177381	247346	111693	99171.3	186823	111938	141121	90183.1	76916.3	85595.3	87844.9
10.71_556.2797n	539.276	10.709	pos	PG(22:6(4Z,7Z,10Z,13Z,16Z,19Z)/0:0)	LMGP04050016	Lipids and lipid-like molecules	Glycerophospholipids	Glycerophosphoglycerols	M+H-H2O, M+Na	C28H45O9P	38.1	0	-0.819695	1.66825	0.00717724	0.0171467	0.687217	1.61017	424883	263874	382567	519546	267058	492675	368437	371490	608815	563520	155120	519601	316532	262461	308912	401526	226185	276558	190045	233870	158774
1.12_160.1329m/z	160.133	1.12177	pos	(3Z)-2-Propylpent-3-enoic acid	LMFA01030946	Lipids and lipid-like molecules	Fatty Acyls	Fatty Acids and Conjugates	M+NH4	C8H14O2	51.3	61.8	-2.36437	1.62627	0.0155793	0.0324653	0.676633	1.59841	427963	267744	354937	238200	223965	296259	567922	422243	573042	690750	526323	385987	316304	295550	157766	259835	219277	328274	444523	168107	220054
0.75_134.1173m/z	134.117	0.747167	pos	Propanal	HMDB0003366	Organic oxygen compounds	Organooxygen compounds	Carbonyl compounds	2M+NH4	C3H6O	38.9	0	-1.84602	3.48445	0.00217698	0.00650918	0.660412	1.58053	1.59894e+06	1.01164e+06	1.47737e+06	2.15287e+06	1.29675e+06	943178	1.11649e+06	1.7446e+06	1.6907e+06	2.39997e+06	1.47827e+06	1.68917e+06	1.26894e+06	811464	630984	1.21485e+06	850812	1.20904e+06	1.0584e+06	978830	1.08147e+06
1.72_145.0494m/z	145.049	1.72325	pos	3-hexenedioic acid	44713	Lipids and lipid-like molecules	Fatty Acyls	Fatty acids and conjugates	M+H	C6H8O4	48.5	46.6	-1.04656	1.00631	0.0275156	0.0517993	0.639093	1.55735	174990	112364	209140	207449	95983.5	91551.1	113753	114255	236150	272389	208103	201126	195283	152114	37212.7	80766	78325.3	115385	119325	124111	108754
10.06_619.2890m/z	619.289	10.0595	neg	1-Arachidonoylglycerophosphoinositol	HMDB0061690	Lipids and lipid-like molecules	Glycerophospholipids	Glycerophosphoinositols	M-H	C29H49O12P	49.4	48.2	0.200467	6.99169	0.00659708	0.0160032	0.624435	1.54161	8.96478e+06	5.81522e+06	7.55344e+06	8.1837e+06	6.81917e+06	1.23312e+07	9.71384e+06	8.49816e+06	7.73147e+06	7.34876e+06	6.4605e+06	1.50076e+07	5.81497e+06	5.51882e+06	8.71438e+06	5.76526e+06	5.82127e+06	7.47316e+06	4.57526e+06	4.20797e+06	4.44588e+06
9.62_501.2850n	502.292	9.61683	pos	LysoPE(0:0/20:4(8Z,11Z,14Z,17Z))	HMDB0011488	Lipids and lipid-like molecules	Glycerophospholipids	Glycerophosphoethanolamines	M+H, M+Na, M+H-H2O	C25H44NO7P	55.9	83.2	-1.09814	9.56351	0.0052384	0.0132291	0.624356	1.54152	1.67893e+07	1.08914e+07	1.24947e+07	1.40815e+07	1.2761e+07	2.11615e+07	2.26322e+07	1.27107e+07	1.2329e+07	1.48679e+07	2.0791e+07	2.40636e+07	1.20125e+07	8.64454e+06	1.6916e+07	1.12229e+07	1.29943e+07	1.08489e+07	7.78149e+06	1.01155e+07	7.4864e+06
0.76_151.0249m/z	151.025	0.7611	neg	D-2,3-Dihydroxypropanoic acid	HMDB0031818	Organic oxygen compounds	Organooxygen compounds	Carbohydrates and carbohydrate conjugates	M+FA-H	C3H6O4	40.2	5.59	1.19254	1.92054	4.19103e-07	6.84995e-06	0.612215	1.5286	419575	274482	421471	453010	430440	383023	371490	421630	411449	526623	380397	396214	276784	300740	248059	243046	266026	348862	265338	254104	267381
1.77_367.1495m/z	367.149	1.76648	pos	Tetrahydropentoxyline	HMDB0029992	Alkaloids and derivatives	Harmala alkaloids	Unclassified	M+H	C17H22N2O7	49.2	52	-1.39225	2.55946	0.000731115	0.00269823	0.607569	1.52369	904372	593541	1.07361e+06	949489	904566	765346	783739	634161	1.08789e+06	1.18353e+06	752689	908687	784036	719362	313924	583892	488778	788401	609185	529845	524443
0.72_195.0501m/z	195.05	0.71935	neg	Gluconic acid	HMDB0000625	Organic oxygen compounds	Organooxygen compounds	Carbohydrates and carbohydrate conjugates	M-H	C6H12O7	46.1	37.5	-4.47132	2.22995	1.25416e-05	9.84595e-05	0.583645	1.49863	652325	435281	584432	561112	591977	563507	756762	690039	695948	641349	670561	767561	389559	366716	465062	537080	296221	472066	540380	407686	442755
9.86_361.2731m/z	361.273	9.85757	pos	O-Arachidonoyl Glycidol	44872	Unclassified	Unclassified	Unclassified	M+H	C23H36O3	55.1	82.7	-1.77037	1.62125	0.0312916	0.0577314	0.580734	1.49561	649662	434379	523388	608582	525393	1.01176e+06	939157	470568	439728	495026	449357	1.03366e+06	434622	389851	724895	460887	428440	533291	307055	327603	302770
1.22_300.0838m/z	300.084	1.219	pos	D-4'-Phosphopantothenate	HMDB0001016	Organic acids and derivatives	Carboxylic acids and derivatives	Amino acids, peptides, and analogues	M+H	C9H18NO8P	55.4	82.3	-1.66129	1.60439	0.000578995	0.00222144	0.57312	1.48774	404565	271933	297856	288027	507454	457454	443601	514887	456692	417266	286622	375794	206796	260944	254210	297992	292446	321826	301336	268609	243240
10.03_687.2767m/z	687.277	10.0272	neg	N-Desmethylritonavir	HMDB0060896	Organic acids and derivatives	Carboxylic acids and derivatives	Amino acids, peptides, and analogues	M-H2O-H	C36H46N6O5S2	34.7	0	-3.59238	1.36343	0.00799911	0.0187638	0.508075	1.42215	401481	282305	355489	398197	304517	525717	390373	429066	385200	383735	240589	601925	275579	262497	392917	296184	273366	372371	241902	211153	214780
9.90_569.2748n	570.282	9.89997	pos	PS(22:6(4Z,7Z,10Z,13Z,16Z,19Z)/0:0)	LMGP03050013	Lipids and lipid-like molecules	Glycerophospholipids	Glycerophosphoserines	M+H, M+Na	C28H44NO9P	51.2	61.5	-0.995976	1.73951	0.030172	0.0561178	0.502742	1.4169	682822	481911	632223	789565	501316	644767	499049	499162	671140	909599	523696	1.1577e+06	523570	353968	621326	567354	482531	716908	348803	450658	272082
10.10_620.2954n	603.292	10.0983	pos	PI(20:4(5Z,8Z,11Z,14Z)/0:0)	LMGP06050006	Lipids and lipid-like molecules	Glycerophospholipids	Glycerophosphoinositols	M+H-H2O, M+Na, M+H	C29H49O12P	56.7	88.1	-1.18682	5.6913	0.00831458	0.019352	0.494426	1.40876	7.01649e+06	4.98061e+06	6.20126e+06	6.77987e+06	5.79713e+06	8.55826e+06	6.93489e+06	6.3114e+06	6.62919e+06	7.04796e+06	4.86796e+06	1.1037e+07	4.74655e+06	4.53614e+06	6.74306e+06	5.88371e+06	4.22471e+06	6.80487e+06	4.3705e+06	3.73445e+06	3.78151e+06
10.18_479.3012n	478.294	10.1801	neg	LysoPE(18:1(11Z)/0:0)	HMDB0011505	Lipids and lipid-like molecules	Glycerophospholipids	Glycerophosphoethanolamines	M-H, 2M-H	C23H46NO7P	51.5	60.4	0.104854	3.06102	0.0141458	0.0300596	0.443049	1.35947	2.76164e+06	2.0314e+06	2.63926e+06	2.29219e+06	2.3822e+06	3.49971e+06	3.6798e+06	2.6763e+06	1.98532e+06	1.86698e+06	2.95197e+06	3.64271e+06	2.33576e+06	1.96957e+06	2.84811e+06	1.97763e+06	2.58194e+06	1.82487e+06	1.42551e+06	1.6398e+06	1.67944e+06
10.20_479.3008n	480.308	10.198	pos	LysoPE(0:0/18:1(11Z))	HMDB0011475	Lipids and lipid-like molecules	Glycerophospholipids	Glycerophosphoethanolamines	M+H, 2M+H, 2M+Na	C23H46NO7P	55.9	82.9	-0.886242	4.85159	0.0289274	0.0540988	0.389287	1.30975	8.50633e+06	6.49464e+06	7.49429e+06	7.22806e+06	7.05495e+06	1.0962e+07	1.07795e+07	8.64744e+06	6.60344e+06	6.68613e+06	8.28996e+06	1.13175e+07	6.67178e+06	6.15352e+06	1.02564e+07	6.28007e+06	8.40642e+06	6.04738e+06	4.53831e+06	5.33588e+06	4.76199e+06
3.65_784.1505m/z	784.15	3.65413	neg	FAD	HMDB0001248	Nucleosides, nucleotides, and analogues	Flavin nucleotides	Unclassified	M-H	C27H33N9O15P2	55.6	80.1	0.784035	2.71204	0.000580206	0.00222461	0.362715	1.28584	1.60785e+06	1.25043e+06	1.44966e+06	1.3974e+06	1.64811e+06	1.66504e+06	1.7801e+06	1.51002e+06	1.91189e+06	1.50913e+06	1.27649e+06	1.9307e+06	1.13939e+06	1.29907e+06	979227	1.27716e+06	1.28259e+06	1.45822e+06	1.36333e+06	1.19649e+06	1.25837e+06
1.12_152.0331n	153.04	1.12177	pos	Oxypurinol	866	Organoheterocyclic compounds	Imidazopyrimidines	Purines and purine derivatives	M+H, M+NH4	C5H4N4O2	46.5	41.4	-2.284	1.8523	0.0132016	0.0283906	0.361891	1.28511	939359	730956	689770	1.05679e+06	992147	677078	822571	1.36808e+06	772696	1.17918e+06	939546	895727	744318	719567	682903	843394	770463	764341	696032	683685	673905
1.12_164.0471n	182.081	1.12177	pos	2-Hydroxycinnamic acid	306	Phenylpropanoids and polyketides	Cinnamic acids and derivatives	Hydroxycinnamic acids and derivatives	M+H, M+NH4, M+H-H2O	C9H8O3	51.5	62.7	-1.74743	3.33944	0.0125445	0.0272241	0.253478	1.19208	4.25429e+06	3.5688e+06	3.38089e+06	4.10665e+06	5.28568e+06	4.36126e+06	3.99192e+06	4.86538e+06	4.03417e+06	5.17836e+06	3.41796e+06	3.92061e+06	3.56983e+06	3.31228e+06	3.20979e+06	3.90942e+06	3.79287e+06	3.97277e+06	3.35243e+06	3.86212e+06	3.1377e+06
3.68_439.1009m/z	439.101	3.68373	pos	Riboflavin cyclic-4',5'-phosphate	HMDB0059614	Organoheterocyclic compounds	Pteridines and derivatives	Alloxazines and isoalloxazines	M+H	C17H19N4O8P	52.4	66.2	-0.955248	1.02618	0.0283135	0.0531285	0.235579	1.17738	429841	365083	434185	430624	415852	387534	427867	347270	517385	479596	331758	526342	375723	388667	252280	407908	331226	423046	395784	359491	351622
8.32_386.1724n	387.18	8.3214	pos	Isogingerenone B	HMDB0035404	Phenylpropanoids and polyketides	Diarylheptanoids	Linear diarylheptanoids	M+H, M+K, M+NH4, M+Na, 2M+NH4, 2M+Na, 2M+K, M+H-H2O	C22H26O6	39	0.512	-1.40367	5.19351	0.0405811	0.0713588	-0.213316	0.862553	1.38468e+07	1.60532e+07	1.51888e+07	1.37718e+07	1.45508e+07	1.3196e+07	1.06264e+07	1.43359e+07	1.61618e+07	1.28217e+07	1.17833e+07	1.60312e+07	1.60861e+07	1.42137e+07	1.5634e+07	1.96887e+07	1.23106e+07	1.96247e+07	1.74851e+07	1.37523e+07	1.56839e+07
3.42_201.0360n	200.029	3.41835	neg	Thiabendazole	HMDB0014868	Organoheterocyclic compounds	Benzimidazoles	Unclassified	M-H, M+FA-H	C10H7N3S	38.5	0	-0.170483	1.30701	0.00405892	0.0107498	-0.257766	0.836382	498950	596558	459423	525964	448629	489873	438272	665415	534124	453260	483789	490753	546602	528194	704051	619575	641389	548928	655461	548543	576277
3.42_199.0392n	198.032	3.41835	neg	p-CHLOROPHENYLALANINE	44308	Unclassified	Unclassified	Unclassified	M-H, 2M-H, M+FA-H	C9H10ClNO2	50.1	80.2	-3.93493	2.3112	0.00354997	0.00966614	-0.261881	0.834	1.51387e+06	1.81519e+06	1.39095e+06	1.59874e+06	1.37822e+06	1.49438e+06	1.33162e+06	2.00818e+06	1.6117e+06	1.39354e+06	1.46727e+06	1.46407e+06	1.66264e+06	1.59205e+06	2.16087e+06	1.89692e+06	1.95727e+06	1.68139e+06	1.98238e+06	1.67809e+06	1.72509e+06
1.12_113.0347m/z	113.035	1.12177	pos	Uracil	258	Organoheterocyclic compounds	Diazines	Pyrimidines and pyrimidine derivatives	M+H	C4H4N2O2	53.8	74.1	1.43705	1.29321	0.0142796	0.030258	-0.274947	0.826481	522139	631762	516836	515279	411564	555165	512594	659742	462591	645178	510387	432056	741569	696809	444377	692921	600127	722082	635983	571931	580058
17.44_120.0437n	138.077	17.436	pos	Purine	6193	Organoheterocyclic compounds	Imidazopyrimidines	Purines and purine derivatives	M+H, M+NH4	C5H4N4	56.7	89.9	0.529683	2.73378	0.00228823	0.00676599	-0.349687	0.784754	1.52387e+06	1.94184e+06	1.54805e+06	1.46032e+06	1.35241e+06	1.30941e+06	1.16019e+06	2.31269e+06	1.71561e+06	1.66059e+06	1.30818e+06	1.41124e+06	1.89756e+06	2.09263e+06	1.76378e+06	2.05255e+06	1.89669e+06	1.83287e+06	2.13468e+06	2.01107e+06	1.79473e+06
10.12_608.3187m/z	608.319	10.1199	neg	PHHdiA-PE	LMGP20020017	Lipids and lipid-like molecules	Glycerophospholipids	Oxidized glycerophospholipids	M-H	C28H52NO11P	43.8	28.3	-3.03893	1.13127	0.0163701	0.0338125	-0.365336	0.776288	267811	344989	228478	255745	267483	355268	315624	209519	222172	198328	316093	309401	336155	373106	439869	326040	435462	262086	220635	373428	338122
13.63_118.0144m/z	118.014	13.6303	neg	Bovinocidin	HMDB0034259	Organic 1,3-dipolar compounds	Allyl-type 1,3-dipolar organic compounds	Organic nitro compounds	M-H	C3H5NO4	39.5	0	-1.12856	3.06748	1.40061e-07	3.20017e-06	-0.366057	0.7759	1.29633e+06	1.67074e+06	1.23373e+06	1.346e+06	1.20127e+06	1.35415e+06	1.23183e+06	1.47063e+06	1.23702e+06	1.30867e+06	1.30322e+06	1.27675e+06	1.56915e+06	1.72167e+06	1.68367e+06	1.81991e+06	1.54397e+06	1.54643e+06	1.81698e+06	1.60481e+06	1.73005e+06
0.73_375.1617m/z	375.162	0.733317	pos	Sparfloxacin	HMDB0015339	Organoheterocyclic compounds	Quinolines and derivatives	Quinoline carboxylic acids	M+H-H2O	C19H22F2N4O3	36.9	0	-2.68951	1.71616	0.000293139	0.00128245	-0.378482	0.769247	503549	654600	584733	494558	503861	536976	494144	368832	567514	604847	417809	462213	659008	668635	534790	773094	653298	738933	633483	597595	632561
17.46_117.0788n	140.068	17.464	pos	4S-aminopentanoic acid	LMFA01100022	Lipids and lipid-like molecules	Fatty Acyls	Fatty Acids and Conjugates	M+Na, M+K	C5H11NO2	39.4	1.27	-1.53683	1.33067	0.000177752	0.000857226	-0.380201	0.76833	291356	379206	307655	316547	253229	232762	237942	400528	287195	284367	275712	317619	386592	413293	322036	377057	382806	366018	410989	371650	382415
0.25_371.1006m/z	371.101	0.247817	pos	Eszopiclone	HMDB0014546	Organoheterocyclic compounds	Pyrrolopyrazines	Cyclopyrrolones	M+H-H2O	C17H17ClN6O3	35.2	0	-3.12632	1.18998	0.0201205	0.040015	-0.381443	0.767669	356771	464746	318504	347342	238228	256815	280745	586743	409726	414201	339145	376263	425680	504062	297926	402405	467440	497340	576286	512122	499451
12.84_228.1954m/z	228.195	12.8369	pos	9-tridecynoic acid	LMFA01030602	Lipids and lipid-like molecules	Fatty Acyls	Fatty Acids and Conjugates	M+NH4	C13H22O2	51	62.2	-1.79195	1.21687	0.000377004	0.00158314	-0.385337	0.7656	241617	315592	241366	240170	267369	219745	186461	316789	247045	248739	208202	240284	278315	275746	353619	347563	278413	275152	360343	347497	323677
11.63_262.2292n	280.263	11.6338	pos	2-(5,8-Tetradecadienyl)cyclobutanone	HMDB0037519	Organooxygen compounds	Carbonyl compounds	Ketones	M+H, M+NH4, M+H-H2O	C18H30O	55.4	81	-1.61551	5.23856	0.031766	0.0584929	-0.392053	0.762045	5.95469e+06	7.8141e+06	3.86283e+06	4.71763e+06	5.70837e+06	8.15036e+06	6.31754e+06	7.94798e+06	5.62319e+06	5.58191e+06	4.99621e+06	6.64089e+06	4.48704e+06	6.38136e+06	1.2046e+07	8.59988e+06	7.97504e+06	6.58571e+06	7.33119e+06	8.26062e+06	8.66001e+06
0.16_222.0560n	445.119	0.162783	pos	1-(1-Propenylthio)propyl propyl disulfide	HMDB0033041	Organosulfur compounds	Organic disulfides	Dialkyldisulfides	M+H, 2M+H	C9H18S3	36.1	0	-4.90026	1.39496	0.0129963	0.0280326	-0.395795	0.760071	438561	577001	431497	424365	302061	308713	354308	727781	503417	490528	402281	440661	585067	620432	373449	503269	586815	624885	691035	613079	594975
3.48_118.0652m/z	118.065	3.47578	pos	Indole	286	Organoheterocyclic compounds	Indoles and derivatives	Indoles	M+H	C8H7N	53	69.7	0.948844	1.32666	3.17396e-05	0.000209129	-0.402375	0.756612	251327	332174	290612	267833	229496	231500	239120	268044	278261	258271	244581	205547	327796	328071	270556	355698	282232	337789	378615	372924	335883
17.43_118.0145m/z	118.014	17.4336	neg	Aminomalonic acid	HMDB0001147	Organic acids and derivatives	Carboxylic acids and derivatives	Amino acids, peptides, and analogues	M-H	C3H5NO4	39.5	0	-1.02254	2.59699	1.22074e-07	2.95259e-06	-0.404108	0.755703	836559	1.10699e+06	798226	873503	792136	836262	776638	942502	811228	891769	854860	788464	1.0252e+06	1.1801e+06	1.08926e+06	1.23411e+06	1.00769e+06	1.02328e+06	1.18684e+06	1.08802e+06	1.12846e+06
10.92_279.1587m/z	279.159	10.9227	pos	4-(3,7-dimethylocta-2,6-dien-1-yl)benzene-1,2,3,5-tetrol	HMDB0133084	Lipids and lipid-like molecules	Prenol lipids	Quinone and hydroquinone lipids	M+H	C16H22O4	48.7	52.5	-1.25502	1.76746	0.00154156	0.00491249	-0.410991	0.752107	518818	689820	452127	465425	471955	456857	399409	759888	593156	591731	479978	517654	729114	614230	878712	764218	676880	568684	682517	668954	625068
0.02_198.1617n	199.169	0.0194333	pos	2-Octenyl butyrate	92846	Lipids and lipid-like molecules	Fatty Acyls	Fatty alcohol esters	M+H-H2O, M+H, M+Na	C12H22O2	50.8	58.9	-1.56068	2.06205	0.0104963	0.0235329	-0.4123	0.751425	840518	1.11857e+06	1.06248e+06	960542	599245	635194	628849	1.22727e+06	840789	869961	756892	823959	1.48159e+06	1.37677e+06	708787	1.03643e+06	1.05497e+06	1.05129e+06	1.17255e+06	1.10755e+06	1.07716e+06
0.18_114.0735m/z	114.073	0.1769	pos	(±)-2-Propylthiazolidine	HMDB0040058	Organoheterocyclic compounds	Azolidines	Thiazolidines	M+H-H2O	C6H13NS	38.4	1.2	-0.83591	1.02512	0.00145185	0.00468863	-0.428209	0.743184	170493	229409	138453	163083	143825	149618	136519	274201	190631	185852	157586	165163	221526	232084	173621	240240	236321	238287	260414	236505	225683
0.36_122.0734n	123.079	0.361933	pos	2,6-Dimethylphenol	HMDB0032150	Benzenoids	Benzene and substituted derivatives	Phenols and derivatives	M+H-H2O, M+H	C8H10O	37.9	0	1.98842	2.23163	0.00507431	0.0128785	-0.428962	0.742796	850120	1.14449e+06	974164	888531	647039	707763	789840	1.24341e+06	882065	786414	747528	834446	1.37005e+06	1.38183e+06	740376	1.19006e+06	1.35801e+06	1.06458e+06	1.29352e+06	933397	968547
9.19_555.0079m/z	555.008	9.19082	neg	Gossypetin 8-glucuronide 3-sulfate	HMDB0037752	Phenylpropanoids and polyketides	Flavonoids	Flavonoid glycosides	M-H2O-H	C21H18O17S	35.4	0	-1.30474	1.13779	2.28291e-08	8.74668e-07	-0.43392	0.740248	144833	195654	149867	142752	144767	143757	134859	170012	144505	140510	141415	135882	194415	196616	189653	214389	188048	180385	211490	179296	206596
8.94_140.0680m/z	140.068	8.9351	pos	4R-aminopentanoic acid	LMFA01100021	Lipids and lipid-like molecules	Fatty Acyls	Fatty Acids and Conjugates	M+Na	C5H11NO2	40.2	5.93	-1.32887	1.52921	0.00714555	0.0170847	-0.438239	0.738035	432304	585750	473475	479951	302998	307780	321707	684515	503936	464693	328839	455140	657641	692201	362971	542151	616163	556544	637807	618063	588206
0.59_158.0577n	159.065	0.594483	pos	Succinylacetone	4154	Organic acids and derivatives	Keto acids and derivatives	Medium-chain keto acids and derivatives	M+H-H2O, M+H	C7H10O4	41.6	11	-1.42024	2.50186	0.000171046	0.000831123	-0.441409	0.736415	819545	1.11289e+06	840301	700056	779962	785383	594852	1.13374e+06	781481	939580	834764	805335	1.10816e+06	970503	1.07887e+06	1.32657e+06	1.06374e+06	959258	1.06478e+06	1.22393e+06	1.22016e+06
8.25_140.0680m/z	140.068	8.24643	pos	5-amino-pentanoic acid	LMFA01100040	Lipids and lipid-like molecules	Fatty Acyls	Fatty Acids and Conjugates	M+Na	C5H11NO2	40.5	8.65	-1.33791	1.02325	0.0181651	0.0368296	-0.451784	0.731138	215180	294308	259401	253943	132121	130021	152631	320497	261178	231585	187927	222491	373745	382412	155977	227964	298620	298041	312037	299134	300838
17.51_213.9825m/z	213.983	17.5063	pos	Chloroxine	HMDB0015373	Organoheterocyclic compounds	Quinolines and derivatives	Haloquinolines	M+H	C9H5Cl2NO	32.2	10.6	2.09112	1.49037	0.00022748	0.00103996	-0.452027	0.731015	293995	402173	244830	259380	306546	280334	247671	454828	326442	292478	255248	272189	342173	374120	412170	451010	423826	393050	433210	397921	392076
1.08_158.0577n	159.065	1.08022	pos	2-Isopropylmaleate	3279	Lipids and lipid-like molecules	Fatty Acyls	Fatty acids and conjugates	M+H, M+NH4, M+H-H2O	C7H10O4	40.8	6.6	-1.23169	1.37408	0.0255353	0.0487701	-0.453775	0.73013	344076	471253	221466	219914	411579	378419	270878	553426	336016	386487	348863	313709	330956	288680	646216	664441	484259	403563	432773	474081	516304
0.64_218.0787n	257.042	0.636133	pos	Triacetin	HMDB0029592	Lipids and lipid-like molecules	Glycerolipids	Triradylcglycerols	M+Na, M+K	C9H14O6	43.4	22.3	-1.45335	1.37489	0.000608754	0.00231238	-0.457818	0.728087	249218	342292	234903	210623	309091	276777	197868	266900	231610	292680	266806	204927	312435	256670	404359	443922	310935	305772	318988	362472	365077
0.06_136.0889n	159.076	0.0624833	pos	Nona-2,4,6-trienal	HMDB0032441	Organooxygen compounds	Carbonyl compounds	Aldehydes	M+H-H2O, M+Na	C9H12O	41.5	13.1	0.918175	1.84891	0.000117243	0.000611683	-0.459281	0.727349	413701	568779	392199	363544	430293	417687	347938	597625	388993	438161	396156	364409	551983	506951	578857	721602	603729	516893	554258	538836	545902
3.48_155.0449m/z	155.045	3.47578	pos	L-alpha-Amino-5-oxo-2(5H)-isoxazolepropanoic acid	HMDB0034322	Organic acids and derivatives	Carboxylic acids and derivatives	Amino acids, peptides, and analogues	M+H-H2O	C6H8N2O4	38.1	0	-1.43795	2.25092	2.90592e-06	3.06161e-05	-0.459821	0.727076	579113	796496	647650	638498	523525	526748	544636	690120	606052	576268	553237	484397	780240	796713	682424	859323	680481	801440	871111	879046	817684
17.58_155.9985n	138.995	17.5759	pos	m-Chlorobenzoic acid	HMDB0001544	Benzenoids	Benzene and substituted derivatives	Benzoic acids and derivatives	M+H-H2O, M+H	C7H5ClO2	34.2	0	4.22032	1.35515	0.000131752	0.000672806	-0.460567	0.726701	233604	321458	197351	227194	237161	217991	194516	358566	251432	226378	198499	226948	279134	316897	322795	356786	339040	311276	357622	301765	307804
17.52_205.0169m/z	205.017	17.5203	pos	O-methoxycatechol-O-sulphate	HMDB0060013	Organic acids and derivatives	Organic sulfuric acids and derivatives	Arylsulfates	M+H	C7H8O5S	37.8	0.0735	1.62522	1.27568	0.000214508	0.000992065	-0.460637	0.726665	209228	287929	173712	202342	226271	194357	174741	323576	218180	201631	174994	202477	252275	285596	303080	339377	293606	279179	302989	266005	269255
2.34_332.2790m/z	332.279	2.33508	pos	12,13-DHOME	HMDB0004705	Lipids and lipid-like molecules	Fatty Acyls	Fatty acids and conjugates	M+NH4	C18H34O4	38.4	0	-1.85804	1.18905	0.0026172	0.00749957	-0.461416	0.726273	204439	281491	268072	231193	176008	176162	142205	292036	210025	189941	174257	184497	384106	318055	278652	308333	259154	222341	260807	241146	260826
0.32_127.0865m/z	127.086	0.319233	pos	Adipamide	LMFA08010017	Lipids and lipid-like molecules	Fatty Acyls	Fatty amides	M+H-H2O	C6H12N2O2	46.3	34.2	-0.781254	1.27289	0.000167165	0.000816308	-0.462704	0.725625	195850	269905	188028	170999	204604	202680	160428	282111	181610	208759	189294	169986	258337	235501	279204	346401	286019	242899	263733	253343	263709
14.92_124.0870m/z	124.087	14.9236	pos	L-Histidinol	HMDB0003431	Organic nitrogen compounds	Organonitrogen compounds	Amines	M+H-H2O	C6H11N3O	38.7	0	0.241688	2.37371	0.00362145	0.00982527	-0.4629	0.725526	890755	1.22774e+06	1.03767e+06	949021	983762	716444	553432	1.00859e+06	1.01571e+06	929199	862998	850727	1.26059e+06	1.02668e+06	1.15735e+06	1.32294e+06	848923	966533	1.77092e+06	1.31645e+06	1.37924e+06
17.42_139.0613m/z	139.061	17.4218	pos	8-Hydroxypurine	HMDB0012182	Organoheterocyclic compounds	Imidazopyrimidines	Purines and purine derivatives	M+H	C5H6N4O	39	0	-1.26358	1.2901	5.46391e-05	0.00032924	-0.465884	0.724027	202933	280284	201466	195560	192421	173605	164690	309369	212644	208365	177917	193294	262356	281395	259820	298031	293608	269653	309293	274854	273544
0.32_141.1020m/z	141.102	0.319233	pos	2-Acetyl-1-methylpyrrole	HMDB0040360	Organooxygen compounds	Carbonyl compounds	Ketones	M+NH4	C7H9NO	42.7	17.4	-1.82741	1.45922	9.83815e-05	0.000530019	-0.474384	0.719774	245142	340581	236805	213942	256164	257913	209445	340384	225023	262270	237467	212003	333452	292236	353778	437540	370766	302028	326635	316134	332662
9.06_460.2687m/z	460.269	9.05688	pos	3-O-Acetylepisamarcandin	HMDB0031958	Phenylpropanoids and polyketides	Coumarins and derivatives	Unclassified	M+NH4	C26H34O6	54.4	75.5	-1.50106	2.37774	0.010004	0.022637	-0.477045	0.718448	914331	1.27265e+06	876574	695193	1.14351e+06	910507	689548	1.33207e+06	1.20533e+06	1.0432e+06	528372	719012	875546	996660	1.59148e+06	1.70054e+06	1.13038e+06	1.33785e+06	1.49341e+06	1.17283e+06	1.15514e+06
0.80_300.0486m/z	300.049	0.803017	neg	N-Acetyl-D-Glucosamine 6-Phosphate	HMDB0001062	Organic oxygen compounds	Organooxygen compounds	Carbohydrates and carbohydrate conjugates	M-H	C8H16NO9P	38.3	0	-1.35628	1.23366	0.000342217	0.0014614	-0.479271	0.71734	204453	285015	173417	139970	218487	181206	205884	247303	236111	221617	203537	216998	244233	194482	263988	290948	315856	290049	350865	292414	322303
10.86_805.5838n	804.577	10.8605	neg	PS(15:0/22:0)	HMDB0112334	Lipids and lipid-like molecules	Glycerophospholipids	Glycerophosphoserines	M-H, M+FA-H	C43H84NO10P	40.8	7.82	0.640179	8.65554	0.0496886	0.084321	-0.483312	0.715334	1.41923e+07	1.98401e+07	1.68502e+07	9.18181e+06	1.67379e+07	1.1248e+07	1.65072e+07	1.04557e+07	1.21697e+07	1.4841e+07	1.37748e+07	2.01569e+07	1.68602e+07	2.74491e+07	1.38536e+07	2.99741e+07	1.3356e+07	2.55501e+07	1.21485e+07	2.77228e+07	1.16468e+07
10.16_296.2580m/z	296.258	10.1552	pos	alpha-Linolenic acid	LMFA01030152	Lipids and lipid-like molecules	Fatty Acyls	Fatty Acids and Conjugates	M+NH4	C18H30O2	53.5	73.7	-1.61576	1.24928	0.0214908	0.042265	-0.485051	0.714472	270440	378518	222588	219420	234795	323461	208637	312462	301094	322529	295495	263920	209477	370478	402970	395869	238258	265431	444236	471478	608462
8.32_432.2375m/z	432.237	8.3214	pos	Clausarinol	HMDB0041407	Phenylpropanoids and polyketides	Coumarins and derivatives	Pyranocoumarins	M+NH4	C24H30O6	53.8	75.3	-1.44966	2.68629	0.00455217	0.0118091	-0.489651	0.712197	1.02932e+06	1.44527e+06	867584	837469	1.24779e+06	1.05307e+06	814344	1.65727e+06	1.1766e+06	1.00138e+06	665323	972361	1.02318e+06	1.1307e+06	1.64273e+06	1.89501e+06	1.5273e+06	1.5426e+06	1.6105e+06	1.34726e+06	1.28817e+06
10.52_572.2977m/z	572.298	10.5237	pos	PS(20:2(11Z,14Z)/0:0)	LMGP03050021	Lipids and lipid-like molecules	Glycerophospholipids	Glycerophosphoserines	M+Na	C26H48NO9P	45.9	62.7	3.31284	2.404	0.0189024	0.03807	-0.494933	0.709595	957715	1.34966e+06	782297	1.08363e+06	538454	1.42883e+06	982368	629124	962170	999484	581974	1.58881e+06	1.45905e+06	1.25812e+06	1.71941e+06	1.46967e+06	1.54754e+06	1.54516e+06	921624	1.42947e+06	796940
2.37_324.2164m/z	324.216	2.36587	pos	N-Jasmonoylisoleucine	HMDB0029391	Organic acids and derivatives	Carboxylic acids and derivatives	Amino acids, peptides, and analogues	M+H	C18H29NO4	38.5	0	-1.57174	1.3177	0.000424673	0.00173942	-0.498988	0.707603	203215	287188	179344	162753	199773	203004	156477	324344	202711	224311	196880	182557	246725	253219	276744	360516	299353	254284	299459	296941	297452
10.84_184.9853m/z	184.985	10.8375	pos	Oxoglutaric acid	HMDB0000208	Organic acids and derivatives	Keto acids and derivatives	Gamma-keto acids and derivatives	M+K	C5H6O5	40.8	11.6	4.39846	2.05695	0.000581368	0.0022271	-0.502721	0.705774	506547	717718	432000	463060	548170	496352	424980	819523	546146	500561	387961	446721	592752	660686	810547	882488	776452	714375	727487	667356	627323
5.70_412.2806n	413.288	5.69933	pos	3-methoxy Limaprost	45111	Unclassified	Unclassified	Unclassified	M+H, M+Na, 2M+Na, 2M+H	C23H40O6	42.8	22.1	-4.68155	1.03542	0.00177144	0.00551829	-0.505868	0.704236	138225	196277	136764	128849	114604	124054	123128	203088	145079	141019	140913	124756	188941	179893	306507	171215	201288	184476	180362	178951	174860
12.54_795.5758n	813.617	12.5351	pos	PC(15:0/22:4(7Z,10Z,13Z,16Z))	HMDB0007955	Lipids and lipid-like molecules	Glycerophospholipids	Glycerophosphocholines	M+H-H2O, M+NH4	C45H82NO8P	37.8	0	-2.49214	11.7478	0.00212194	0.00637979	-0.507488	0.703446	1.72983e+07	2.45907e+07	2.1357e+07	2.09649e+07	2.27053e+07	1.39139e+07	1.46383e+07	2.03032e+07	1.51181e+07	1.41477e+07	1.40873e+07	1.57468e+07	2.28881e+07	3.50714e+07	2.56437e+07	2.64641e+07	2.38465e+07	2.34217e+07	2.59077e+07	2.29252e+07	1.51482e+07
12.49_780.5868m/z	780.587	12.4923	pos	PE(P-18:0/20:1(11Z))	LMGP02030053	Lipids and lipid-like molecules	Glycerophospholipids	Glycerophosphoethanolamines	M+Na	C43H84NO7P	36.4	0	-1.27978	5.03719	0.0345233	0.0625539	-0.524688	0.695109	4.08649e+06	5.87892e+06	3.77486e+06	3.48024e+06	6.26138e+06	3.16856e+06	3.4427e+06	7.12854e+06	5.40946e+06	1.78748e+06	2.8705e+06	3.54122e+06	6.07899e+06	5.89452e+06	7.47895e+06	8.7982e+06	5.78343e+06	4.95043e+06	6.92854e+06	3.34702e+06	3.6502e+06
0.79_259.0223m/z	259.022	0.78905	neg	Glucose 1-phosphate	HMDB0001586	Organic oxygen compounds	Organooxygen compounds	Carbohydrates and carbohydrate conjugates	M-H	C6H13O9P	53.1	68.1	-0.595829	3.8745	1.34495e-05	0.000104546	-0.526395	0.694288	1.49042e+06	2.14669e+06	1.53709e+06	1.1365e+06	1.60893e+06	1.83805e+06	1.64915e+06	1.60932e+06	1.44498e+06	1.48166e+06	1.24745e+06	1.35103e+06	1.89891e+06	1.79776e+06	2.0056e+06	2.01947e+06	2.49003e+06	2.10902e+06	2.56521e+06	2.06356e+06	2.3706e+06
10.06_520.2658m/z	520.266	10.0595	neg	LysoPE(0:0/18:3(6Z,9Z,12Z))	HMDB0011478	Lipids and lipid-like molecules	Glycerophospholipids	Glycerophosphoethanolamines	M+FA-H	C23H42NO7P	38.6	2.18	-4.8291	1.01749	0.0247818	0.0475984	-0.540074	0.687736	147861	214997	116075	147086	138948	206136	184274	109927	104010	94256.1	165414	212486	212507	254600	337159	174385	297746	127377	120263	232863	178075
1.38_284.0757n	283.068	1.37937	neg	Xanthosine	HMDB0000299	Nucleosides, nucleotides, and analogues	Purine nucleosides	Unclassified	M-H, 2M-H	C10H12N4O6	48.2	42.7	0.0436915	2.48865	0.00116505	0.00391557	-0.541102	0.687246	688049	1.00117e+06	893426	505799	668570	948446	852434	614639	516850	696943	609956	573426	1.19039e+06	1.12789e+06	623666	1.00552e+06	837778	1.24273e+06	1.06177e+06	891692	1.02909e+06
0.73_131.0694n	132.077	0.733317	pos	Creatine	7	Organic acids and derivatives	Carboxylic acids and derivatives	Amino acids, peptides, and analogues	M+H, 2M+Na, 2M+H	C4H9N3O2	56.1	85.5	-0.348974	20.0581	1.88208e-06	2.17884e-05	-0.553119	0.681545	3.59919e+07	5.28093e+07	3.62356e+07	2.94448e+07	2.95903e+07	4.13692e+07	3.40178e+07	3.92571e+07	4.22521e+07	4.12805e+07	2.82473e+07	3.82244e+07	4.92914e+07	5.07738e+07	5.06013e+07	6.25144e+07	5.77746e+07	5.26057e+07	5.41693e+07	5.20563e+07	4.54969e+07
1.88_324.2164m/z	324.216	1.88112	pos	Capsiate	HMDB0034780	Benzenoids	Phenols	Methoxyphenols	M+NH4	C18H26O4	38.5	0	-1.66699	1.14636	0.000555051	0.00215388	-0.55342	0.681403	137782	202203	118532	106542	153410	137792	107223	228369	133718	137413	132382	122436	161311	162112	201845	261184	219358	186893	212401	198520	216202
0.73_133.0799m/z	133.08	0.733317	pos	Isobutyl isothiocyanate	HMDB0032345	Organosulfur compounds	Isothiocyanates	Unclassified	M+NH4	C5H9NS	36.9	0	4.18398	4.087	1.71536e-06	2.0168e-05	-0.554747	0.680776	1.49448e+06	2.19525e+06	1.46254e+06	1.21797e+06	1.21911e+06	1.69453e+06	1.44549e+06	1.65912e+06	1.76618e+06	1.72597e+06	1.17022e+06	1.58362e+06	2.03457e+06	2.10428e+06	2.13294e+06	2.59351e+06	2.3757e+06	2.20587e+06	2.24551e+06	2.15851e+06	1.90637e+06
1.91_332.2789m/z	332.279	1.90965	pos	12,13-DiHOME	LMFA02000230	Lipids and lipid-like molecules	Fatty Acyls	Octadecanoids	M+NH4	C18H34O4	38.4	0	-1.94668	1.25738	0.000352166	0.00149505	-0.557301	0.679572	160839	236677	189326	172483	166337	147810	124218	240330	159160	140190	134203	134339	303443	247237	255864	288097	216443	192789	217624	190626	217975
9.82_566.3210m/z	566.321	9.81508	pos	LysoPC(20:4(5Z,8Z,11Z,14Z))	HMDB0010395	Unclassified	Unclassified	Unclassified	M+Na	C28H50NO7P	57.6	95.9	-1.22246	2.37889	0.00392937	0.0104836	-0.577928	0.669925	661671	987680	652343	730352	579399	735297	659404	520039	554119	586308	529669	1.06978e+06	1.26834e+06	1.05146e+06	1.45349e+06	955688	1.00884e+06	907357	656598	933267	654086
4.49_312.2376m/z	312.238	4.49447	pos	Margaric acid(d3)	LMFA01010048	Lipids and lipid-like molecules	Fatty Acyls	Fatty Acids and Conjugates	M+K	C17H31D3O2	39	0.335	-0.985101	1.29324	0.00184212	0.0056947	-0.581455	0.668289	189921	284190	239072	163325	252042	181156	110889	189596	194727	204150	214550	149706	212947	332585	298020	248456	207335	327238	316911	211675	402545
10.35_235.1689m/z	235.169	10.3538	pos	Petasalbin	HMDB0035639	Lipids and lipid-like molecules	Prenol lipids	Sesquiterpenoids	M+H	C15H22O2	56.6	88.5	-1.6438	1.31104	0.0180616	0.0366601	-0.585612	0.666367	223340	335160	155998	185126	269364	245552	188742	351571	232619	231481	177006	195939	225187	250206	626130	407847	325847	282400	334175	289125	275527
0.75_112.0507m/z	112.051	0.747167	pos	Cytosine	283	Organoheterocyclic compounds	Diazines	Pyrimidines and pyrimidine derivatives	M+H	C4H5N3O	51.8	73.5	1.58805	1.78026	5.04709e-05	0.000308084	-0.596227	0.661482	300478	454250	364381	243043	257360	290925	264112	324277	368061	364712	236532	291381	508762	453370	296296	420357	468578	562602	461497	477585	439208
12.13_788.6146m/z	788.615	12.134	pos	PS(O-16:0/22:0)	LMGP03020089	Lipids and lipid-like molecules	Glycerophospholipids	Glycerophosphoserines	M+H-H2O	C44H88NO9P	42.4	16.8	-2.17602	25.2226	0.0142581	0.030239	-0.598278	0.660542	7.89358e+07	1.19502e+08	6.79566e+07	9.78174e+07	1.26861e+08	8.46497e+07	4.05653e+07	1.17838e+08	5.22592e+07	5.59147e+07	6.6379e+07	7.91173e+07	1.80657e+08	1.10997e+08	1.3677e+08	1.48099e+08	6.59776e+07	6.9638e+07	1.10654e+08	1.18024e+08	1.34696e+08
0.73_114.0663m/z	114.066	0.733317	pos	Creatinine	8	Organic acids and derivatives	Carboxylic acids and derivatives	Amino acids, peptides, and analogues	M+H	C4H7N3O	42.4	17.2	1.41947	3.49211	0.000283469	0.00124738	-0.603207	0.658289	1.14872e+06	1.74501e+06	1.43752e+06	1.10885e+06	848722	1.34226e+06	1.0359e+06	1.19732e+06	1.21531e+06	1.45039e+06	864804	986134	2.121e+06	2.0152e+06	999376	1.93911e+06	1.68566e+06	1.93754e+06	1.68296e+06	1.87009e+06	1.45415e+06
0.73_323.0785m/z	323.079	0.73325	neg	6-(4-ethenyl-5-hydroxy-2-methoxyphenoxy)-3,4,5-trihydroxyoxane-2-carboxylic acid	HMDB0128039	Organic oxygen compounds	Organooxygen compounds	Carbohydrates and carbohydrate conjugates	M-H2O-H	C15H18O9	44.6	36.7	3.79114	1.55215	0.00128516	0.0042452	-0.609552	0.6554	237489	362358	228432	274409	254358	210550	322874	356657	160535	208753	231587	126740	295924	398686	326788	392978	308137	242239	427737	404474	464259
0.84_565.0477m/z	565.048	0.844817	neg	UDP-D-galactose	3599	Nucleosides, nucleotides, and analogues	Pyrimidine nucleotides	Pyrimidine nucleotide sugars	M-H	C15H24N2O17P2	58.4	93.3	-0.0568302	7.659	0.00149898	0.00481199	-0.617602	0.651753	5.9446e+06	9.12094e+06	4.30909e+06	3.4734e+06	4.92355e+06	7.41918e+06	7.94802e+06	9.02033e+06	7.62451e+06	4.45631e+06	3.40335e+06	6.86831e+06	7.84054e+06	7.61613e+06	7.87156e+06	8.47049e+06	1.00339e+07	8.01232e+06	1.22062e+07	9.99476e+06	1.00426e+07
9.26_195.1014m/z	195.101	9.2635	pos	Ethyl 4-methylphenoxyacetate	89776	Benzenoids	Benzene and substituted derivatives	Phenoxyacetic acid derivatives	M+H	C11H14O3	51.7	61.8	-0.933129	1.54605	0.0237861	0.0459301	-0.624359	0.648708	297817	459092	179463	226253	367216	331797	274103	484895	331999	284536	237416	260489	282160	327730	896933	563932	467646	402921	458980	387172	344355
7.97_158.1538m/z	158.154	7.97155	pos	2,4-Nonadien-1-ol	HMDB0034845	Lipids and lipid-like molecules	Fatty Acyls	Fatty alcohols	M+NH4	C9H16O	43.2	26.8	-1.05548	1.87027	0.0166744	0.0343226	-0.628774	0.646726	412974	638561	293510	353899	466137	464199	359045	640295	441244	399718	335097	376595	442842	487620	1.26317e+06	726039	630856	544991	601372	540188	509969
5.01_326.2533m/z	326.253	5.00658	pos	Stearic acid(d3)	LMFA01010047	Lipids and lipid-like molecules	Fatty Acyls	Fatty Acids and Conjugates	M+K	C18H33D3O2	38.9	0.908	-0.871864	1.26808	0.000974149	0.00338483	-0.631393	0.645553	154825	239833	198974	122187	169531	158609	81314.9	148754	184960	189396	177016	117508	156311	287349	232470	262918	174314	286641	239898	199922	318678
0.76_210.0367n	191.019	0.7611	neg	Galactaric acid	HMDB0000639	Organic oxygen compounds	Organooxygen compounds	Carbohydrates and carbohydrate conjugates	M-H2O-H, M-H	C6H10O8	44.8	33.6	-4.32821	2.89485	0.0363731	0.0652443	-0.645528	0.639259	1.09779e+06	1.71728e+06	1.31572e+06	979142	1.20178e+06	1.2597e+06	1.23423e+06	1.04133e+06	1.135e+06	1.02758e+06	768092	1.0153e+06	1.20808e+06	985780	1.66049e+06	1.18902e+06	3.22624e+06	1.40706e+06	1.31392e+06	3.12751e+06	1.33744e+06
0.73_148.0602m/z	148.06	0.733317	pos	L-Glutamate	19	Organic acids and derivatives	Carboxylic acids and derivatives	Amino acids, peptides, and analogues	M+H	C5H9NO4	37.8	36.8	-1.43701	4.63841	0.000411917	0.00169759	-0.650444	0.637084	1.94165e+06	3.04772e+06	1.20768e+06	1.17783e+06	2.15526e+06	2.07213e+06	2.02187e+06	2.55957e+06	2.20892e+06	2.1506e+06	1.8655e+06	1.99717e+06	1.82999e+06	2.19223e+06	2.7382e+06	3.43417e+06	3.44671e+06	3.66647e+06	3.58203e+06	3.44527e+06	3.0944e+06
9.79_528.3100m/z	528.31	9.78973	neg	PE(22:4(7Z,10Z,13Z,16Z)/0:0)	LMGP02050014	Lipids and lipid-like molecules	Glycerophospholipids	Glycerophosphoethanolamines	M-H	C27H48NO7P	38	0	0.747946	1.78115	1.28237e-05	0.00010022	-0.651514	0.636612	237883	373671	292332	207969	238788	244933	283375	278257	204545	204971	217398	206263	466887	322210	434608	385048	444023	343262	336032	317385	313583
0.75_243.0851n	244.092	0.747167	pos	Cytidine	3376	Nucleosides, nucleotides, and analogues	Pyrimidine nucleosides	Unclassified	M+H, 2M+H	C9H13N3O5	52.4	65.5	-1.58651	4.1655	4.16864e-05	0.000262596	-0.658434	0.633566	1.41925e+06	2.24009e+06	1.86764e+06	1.12619e+06	1.18434e+06	1.4938e+06	1.33183e+06	1.48532e+06	1.594e+06	1.58061e+06	1.08535e+06	1.4434e+06	2.16852e+06	2.24974e+06	1.51622e+06	2.06035e+06	2.21967e+06	2.9588e+06	2.61903e+06	2.01362e+06	2.35489e+06
1.13_135.0300m/z	135.03	1.12517	neg	D-Lactic acid	HMDB0001311	Organic acids and derivatives	Hydroxy acids and derivatives	Alpha hydroxy acids and derivatives	M+FA-H	C3H6O3	39.4	0.624	0.67735	2.80368	3.70013e-09	2.19752e-07	-0.660941	0.632466	517304	817916	582005	444921	500733	629899	466121	557648	548884	531680	476060	435086	787253	917223	808639	815513	793931	843666	847243	715382	832393
1.12_243.0850n	244.092	1.12177	pos	gamma-Glutamyl-beta-cyanoalanine	HMDB0060478	Organic acids and derivatives	Carboxylic acids and derivatives	Amino acids, peptides, and analogues	M+H, 2M+H, M+H-H2O	C9H13N3O5	38.7	0	-2.30313	2.4448	8.28252e-05	0.000461999	-0.667303	0.629683	488681	776075	623064	477056	416955	479826	441640	584581	486687	572867	349524	454607	934440	967355	520435	753482	768072	965939	732512	637009	705429
4.01_298.2221m/z	298.222	4.01122	pos	Palmitic acid(d3)	LMFA01010046	Lipids and lipid-like molecules	Fatty Acyls	Fatty Acids and Conjugates	M+K	C16H29D3O2	39.1	0.242	-0.598354	1.33336	0.000190308	0.000905789	-0.692634	0.618723	139618	225654	180845	122795	195347	139307	84292.2	150870	122889	139983	144059	115789	184427	265866	242760	206080	149821	245133	258356	185135	293313
0.76_136.0384n	137.046	0.761033	pos	Allopurinol	HMDB0014581	Organoheterocyclic compounds	Pyrazolopyrimidines	Pyrazolo[3,4-d]pyrimidines	M+H, 2M+H	C5H4N4O	40.7	11	-1.11735	7.06752	0.000654074	0.00245784	-0.71574	0.608893	4.19358e+06	6.88723e+06	2.5651e+06	2.25996e+06	4.61462e+06	4.56046e+06	4.2381e+06	4.80747e+06	5.68857e+06	5.18566e+06	3.74128e+06	4.27462e+06	4.08878e+06	4.46282e+06	5.85028e+06	8.41199e+06	7.65982e+06	8.66816e+06	8.3248e+06	7.32371e+06	7.1947e+06
0.73_425.0807m/z	425.081	0.73325	neg	Cysteineglutathione disulfide	HMDB0000656	Organic acids and derivatives	Carboxylic acids and derivatives	Amino acids, peptides, and analogues	M-H	C13H22N4O8S2	51.9	71.4	0.219788	2.78573	0.000240748	0.00109152	-0.720634	0.606831	576123	949397	606092	433647	622005	622208	476860	707415	636111	540254	423993	692645	1.16322e+06	1.37492e+06	982931	949452	981042	702923	966062	595229	828792
1.08_128.0455m/z	128.045	1.08022	pos	1-Methyl-4-nitroimidazole	HMDB0060659	Organoheterocyclic compounds	Azoles	Imidazoles	M+H	C4H5N3O2	39.7	4.13	0.108849	1.78868	3.33929e-05	0.000218247	-0.732123	0.602017	214218	355833	199200	169876	181892	304691	211130	216898	236859	271468	168256	181906	357750	343238	260282	482962	353338	408437	363836	348922	283728
0.75_278.0551m/z	278.055	0.747133	neg	Cidofovir	HMDB0014513	Organoheterocyclic compounds	Diazines	Pyrimidines and pyrimidine derivatives	M-H	C8H14N3O6P	32.5	0	1.23593	1.39546	5.83117e-05	0.000347864	-0.742488	0.597708	128031	214203	169510	137969	115252	129542	162639	160354	80524.5	105722	124916	93882.3	169235	209159	170043	268626	177546	207904	263305	201177	260835
0.66_225.0610m/z	225.061	0.66385	neg	D-Glucose	HMDB0000122	Organic oxygen compounds	Organooxygen compounds	Carbohydrates and carbohydrate conjugates	M+FA-H	C6H12O6	47.3	42.4	-3.17734	2.11666	1.60688e-09	1.13279e-07	-0.743275	0.597382	252145	422084	304026	203627	225509	304590	247782	267427	274294	238458	225435	230302	416979	477595	386857	392761	446685	402458	436632	411629	427157
3.62_412.1338n	413.141	3.62222	pos	N6-Carbamoyl-L-threonyladenosine	95993	Nucleosides, nucleotides, and analogues	Purine nucleosides	Unclassified	M+H, M+Na	C15H20N6O8	48.3	47	-1.08936	1.21066	0.000688318	0.00256375	-0.767027	0.587627	116251	197831	146845	100397	112395	102058	86274.8	70457.1	154821	165903	103846	119511	228592	253701	114609	211460	162698	282062	204021	143998	179337
0.72_287.0521m/z	287.052	0.71935	neg	Orotidine	5754	Nucleosides, nucleotides, and analogues	Pyrimidine nucleosides	Unclassified	M-H	C10H12N2O8	46.7	37.8	-0.126593	2.76185	8.41964e-08	2.27435e-06	-0.768507	0.587024	436543	743655	461415	316644	398139	560348	474072	455988	490815	443883	351996	412135	705786	777226	647099	746481	649888	841734	863981	672852	787844
2.54_219.1104n	220.118	2.5442	pos	Pantothenic Acid	241	Organooxygen compounds	Alcohols and polyols	Polyols	M+H, M+K, M+Na, 2M+Na, M+H-H2O	C9H17NO5	57.8	91.5	-1.26545	7.38677	2.5811e-05	0.000176713	-0.775299	0.584268	3.5314e+06	6.04415e+06	4.57225e+06	3.17529e+06	3.17402e+06	3.85507e+06	3.82714e+06	2.7427e+06	3.57325e+06	4.23515e+06	2.89952e+06	3.25964e+06	7.06815e+06	7.29495e+06	3.66666e+06	6.30155e+06	4.87522e+06	7.46979e+06	6.56921e+06	5.40772e+06	5.74412e+06
1.12_192.0604n	385.128	1.12177	pos	2-(Methylthiomethyl)-3-phenyl-2-propenal	HMDB0037166	Phenylpropanoids and polyketides	Cinnamaldehydes	Unclassified	M+H, 2M+H	C11H12OS	38.1	0	-2.39931	2.18686	0.000536087	0.00209671	-0.798856	0.574805	327536	569821	444082	110525	521716	217095	349031	415985	378101	355728	201355	281737	317880	613181	459723	712379	566467	613973	527132	701351	616297
12.51_767.5450n	768.551	12.5066	pos	PE(18:0/20:4(5Z,8Z,11Z,14Z))	LMGP02010118	Lipids and lipid-like molecules	Glycerophospholipids	Glycerophosphoethanolamines	M+H-H2O, M+H	C43H78NO8P	51.9	66.9	-1.97549	24.062	0.0406921	0.0714977	-0.799061	0.574723	5.38689e+07	9.37302e+07	8.80228e+07	8.77435e+07	3.05644e+07	4.0426e+07	4.30566e+07	1.00436e+08	4.70975e+07	2.78616e+07	3.76294e+07	3.58513e+07	6.21976e+07	1.48158e+08	1.50933e+08	1.30016e+08	1.46992e+08	7.65399e+07	4.04967e+07	4.21542e+07	4.60847e+07
11.05_855.5967n	854.591	11.0457	neg	PS(20:3(8Z,11Z,14Z)/21:0)	LMGP03010614	Lipids and lipid-like molecules	Glycerophospholipids	Glycerophosphoserines	M-H2O-H, M-H	C47H86NO10P	40.4	13.6	-2.61642	7.51319	0.0152975	0.0320089	-0.814879	0.568456	5.05941e+06	8.90026e+06	7.2755e+06	3.11516e+06	7.41494e+06	2.72359e+06	4.89954e+06	3.72126e+06	6.21841e+06	3.48872e+06	5.67256e+06	6.0644e+06	1.63476e+07	7.65357e+06	6.75775e+06	8.72898e+06	1.52487e+07	6.68623e+06	5.64561e+06	8.50646e+06	4.52739e+06
1.92_242.0899n	287.089	1.91918	neg	Thymidine	HMDB0000273	Nucleosides, nucleotides, and analogues	Pyrimidine nucleosides	Pyrimidine 2'-deoxyribonucleosides	M-H, M+FA-H	C10H14N2O5	42.2	13.3	-1.62332	1.62588	0.00124987	0.00414363	-0.816173	0.567946	171468	301909	208381	115744	107096	377946	221751	110728	146938	167711	158180	100205	403803	286093	194941	290934	311605	366591	313872	289092	260250
11.73_354.2763n	355.283	11.733	pos	2-Linoleoyl Glycerol	63032	Unclassified	Unclassified	Unclassified	M+H-H2O, M+H	C21H38O4	57.1	93.6	-1.97962	1.01276	0.0460108	0.079088	-0.81812	0.56718	93644.5	165105	136932	95327.7	54505.6	157929	135626	90570.3	35857.6	36325.6	120392	72979.6	340079	258251	238665	95688.1	148838	154135	72816.3	116863	60613.4
0.83_338.9885m/z	338.989	0.830833	neg	D-myo-Inositol 1,4-bisphosphate	410	Organic oxygen compounds	Organooxygen compounds	Alcohols and polyols	M-H	C6H14O12P2	51.6	62.1	-0.785458	1.4483	0.0348012	0.0629325	-0.826502	0.563895	212006	375968	168315	221081	301638	131668	250471	273893	217970	160111	170765	224151	74238.2	120638	250224	584719	169934	513020	583281	610226	477430
10.18_545.3478n	546.355	10.1838	pos	LysoPC(20:3(5Z,8Z,11Z))	HMDB0010393	Lipids and lipid-like molecules	Glycerophospholipids	Glycerophosphocholines	M+H, M+Na	C28H52NO7P	58.1	94.8	-0.577551	2.61823	0.0103882	0.0233418	-0.837591	0.559577	535156	956358	480785	682487	415489	746307	696380	297037	274785	322666	567880	867747	1.47624e+06	953616	1.66507e+06	851032	956457	943113	399059	888086	474550
0.69_292.1975m/z	292.198	0.691783	pos	Glutaminyllysine	HMDB0028802	Organic acids and derivatives	Carboxylic acids and derivatives	Amino acids, peptides, and analogues	M+NH4	C11H22N4O4	38.5	0	-1.50606	1.20576	0.00396361	0.0105506	-0.838975	0.559041	113304	202675	127417	127541	180874	125647	130957	64511.4	106788	141527	69902.4	57873	212187	266575	71248.3	178768	110825	296979	226978	268535	191982
10.64_572.2955n	555.292	10.6378	pos	1-Palmitoylglycerophosphoinositol	HMDB0061695	Lipids and lipid-like molecules	Glycerophospholipids	Glycerophosphoinositols	M+H-H2O, M+Na	C25H49O12P	51.6	76.3	-1.20209	4.49863	0.00164065	0.00517688	-0.849424	0.555006	1.26989e+06	2.28807e+06	1.12903e+06	1.16617e+06	1.03424e+06	2.54261e+06	1.56076e+06	775413	1.06021e+06	1.03418e+06	705911	1.6904e+06	1.87732e+06	1.99006e+06	3.57971e+06	2.51213e+06	2.84393e+06	2.04591e+06	1.45059e+06	2.50927e+06	1.78372e+06
0.75_275.0885m/z	275.089	0.747133	neg	(2S,3'S)-alpha-Amino-2-carboxy-5-oxo-1-pyrrolidinebutanoic acid	HMDB0039110	Organic acids and derivatives	Carboxylic acids and derivatives	Amino acids, peptides, and analogues	M+FA-H	C9H14N2O5	51.8	63	0.252427	2.14438	1.80715e-06	2.10051e-05	-0.870057	0.547125	231084	422361	292104	212774	199453	273480	286013	203185	248349	172640	244776	178067	513933	382181	282496	467996	460965	395528	498788	384073	415286
2.46_359.1031m/z	359.103	2.45822	pos	Pantetheine 4'-phosphate	HMDB0001416	Organic acids and derivatives	Organic phosphoric acids and derivatives	Phosphate esters	M+H	C11H23N2O7PS	54.6	80.8	-1.57558	1.44496	0.0382978	0.0680354	-0.873635	0.54577	202193	370472	38102.1	13304.4	202155	411218	153325	173942	584690	141649	5478.45	298064	583143	594897	224615	306758	228654	353617	362223	367937	312408
10.16_590.3465m/z	590.347	10.1649	neg	LysoPC(20:3(8Z,11Z,14Z))	HMDB0010394	Lipids and lipid-like molecules	Glycerophospholipids	Glycerophosphocholines	M+FA-H	C28H52NO7P	55	78.6	0.30654	1.10005	0.0154433	0.03224	-0.877792	0.5442	92636.7	170225	83731.1	112059	69525.5	132275	120210	62979.7	46007.8	50174.4	96681	152723	247714	172987	333313	116139	200640	157166	66551.7	153627	83892.2
10.36_438.2991m/z	438.299	10.3612	neg	PE(O-16:0/0:0)	LMGP02060002	Lipids and lipid-like molecules	Glycerophospholipids	Glycerophosphoethanolamines	M-H	C21H46NO6P	53.3	69.1	0.305479	1.9377	0.0152847	0.0319875	-0.92163	0.527912	251552	476503	260037	175590	127405	593721	382730	117039	184818	137712	253149	283317	565050	449407	813645	316399	803701	390412	203955	444675	301283
0.71_104.1073m/z	104.107	0.705617	pos	Choline	56	Organic nitrogen compounds	Organonitrogen compounds	Quaternary ammonium salts	M+H	C5H13NO	51	63.9	2.86943	8.43792	1.39132e-09	1.00117e-07	-0.937093	0.522284	3.07005e+06	5.87813e+06	3.57226e+06	2.88189e+06	2.94975e+06	3.18683e+06	2.86894e+06	3.07862e+06	3.36568e+06	3.16047e+06	2.9483e+06	2.68779e+06	6.69173e+06	6.37101e+06	5.0146e+06	5.57564e+06	4.86627e+06	6.85989e+06	6.25126e+06	5.66868e+06	5.60405e+06
1.17_633.1296m/z	633.13	1.16703	neg	Norsanguinarine	HMDB0030176	Organoheterocyclic compounds	Quinolines and derivatives	Benzoquinolines	2M-H	C19H11NO4	38.4	0	-1.23758	1.99859	4.45113e-09	2.57305e-07	-0.94278	0.520229	167310	321609	228781	124053	176453	223625	160714	172412	164376	154941	125958	141791	319865	317797	316521	290232	319770	352234	323186	290925	363950
0.76_277.1026m/z	277.103	0.761033	pos	Thymidine glycol	HMDB0042036	Nucleosides, nucleotides, and analogues	Pyrimidine nucleosides	Pyrimidine 2'-deoxyribonucleosides	M+H	C10H16N2O7	38.3	0	-1.46648	2.90439	1.0624e-05	8.60141e-05	-0.952322	0.5168	406748	787051	294740	292149	344519	466336	492226	475588	562912	358913	408531	371564	602464	620352	528777	846700	1.02396e+06	919747	954154	775030	812272
0.76_204.1228m/z	204.123	0.761033	pos	L-Acetylcarnitine	HMDB0000201	Lipids and lipid-like molecules	Fatty Acyls	Fatty acid esters	M+H	C9H17NO4	46.5	35.7	-1.25003	13.0118	5.54231e-06	5.13433e-05	-0.970204	0.510434	7.13353e+06	1.39754e+07	1.01564e+07	5.57126e+06	6.3746e+06	1.2165e+07	6.92895e+06	7.70158e+06	5.33502e+06	6.05633e+06	5.20779e+06	5.83843e+06	1.22281e+07	1.36072e+07	9.98745e+06	1.75786e+07	1.3983e+07	1.64435e+07	1.55534e+07	1.31812e+07	1.32165e+07
0.73_134.0446m/z	134.045	0.733317	pos	Fumaric acid	HMDB0000134	Organic acids and derivatives	Carboxylic acids and derivatives	Dicarboxylic acids and derivatives	M+NH4	C4H4O4	38.5	0	-1.84125	1.10692	6.53291e-05	0.000380691	-0.996416	0.501244	58918	117544	21463.7	35442.5	71240	57781.8	54365.1	93129.2	69611.7	69926.4	53381.2	62838.5	60265.3	94373.2	112001	113458	145274	129889	138579	152248	111806
10.54_571.2888m/z	571.289	10.5437	neg	1-hexadecanoyl-sn--glycero-3-phospho-D-myo-inositol	LMGP02060006	Lipids and lipid-like molecules	Glycerophospholipids	Glycerophosphoinositols	M-H	C25H49O12P	49.6	50.2	-0.112821	5.93347	0.00374089	0.0100878	-1.0008	0.499722	1.85331e+06	3.70868e+06	1.47845e+06	1.40807e+06	1.39064e+06	4.29804e+06	2.38153e+06	1.20529e+06	1.29646e+06	1.04219e+06	1.47086e+06	2.56154e+06	2.80792e+06	3.24788e+06	6.62429e+06	3.33547e+06	5.33767e+06	3.25486e+06	2.12734e+06	3.78554e+06	2.85711e+06
1.12_268.1034m/z	268.103	1.12177	pos	Adenosine	86	Nucleosides, nucleotides, and analogues	Purine nucleosides	Unclassified	M+H	C10H13N5O4	54.3	79.6	-2.27101	2.89918	0.00154454	0.00492107	-1.0086	0.49703	461737	928993	649272	360600	493518	323533	622084	335893	439411	338253	626108	428701	1.8148e+06	668422	557401	986917	777502	823419	716649	1.05196e+06	963870
1.12_136.0383n	137.046	1.12177	pos	Hypoxanthine	83	Organoheterocyclic compounds	Imidazopyrimidines	Purines and purine derivatives	M+H, 2M+H	C5H4N4O	46.9	40.6	-1.35051	17.3336	7.4276e-10	6.14351e-08	-1.01192	0.495887	1.16113e+07	2.34152e+07	1.25092e+07	1.09801e+07	1.06376e+07	1.22098e+07	1.11738e+07	1.28714e+07	1.171e+07	1.38768e+07	9.45344e+06	1.06909e+07	2.53394e+07	2.63576e+07	1.80254e+07	2.44073e+07	2.38594e+07	2.60833e+07	2.3985e+07	2.05322e+07	2.21472e+07
1.11_277.1024m/z	277.102	1.10792	pos	gamma-Glutamylglutamic acid	HMDB0011737	Organic acids and derivatives	Carboxylic acids and derivatives	Amino acids, peptides, and analogues	M+H	C10H16N2O7	49.4	55.2	-2.166	1.84733	1.65549e-06	1.95702e-05	-1.02835	0.49027	137296	280042	171237	118018	103310	174135	154048	129450	165567	114429	134906	107860	350388	304141	180179	292637	340187	299300	299074	223764	230708
0.76_306.0764m/z	306.076	0.7611	neg	Glutathionate(1-)	HMDB0062697	Organic acids and derivatives	Carboxylic acids and derivatives	Amino acids, peptides, and analogues	M-H	C10H17N3O6S	51.9	66	-0.49844	2.35269	0.0232294	0.0450205	-1.03218	0.488972	348413	712542	74630.8	30406.5	242322	1.1152e+06	318747	455950	771996	205309	26371.7	243202	1.06268e+06	934165	929704	461476	300133	615357	463547	1.00495e+06	640868
1.12_204.1226m/z	204.123	1.12177	pos	Acetylcarnitine	956	Unclassified	Unclassified	Unclassified	M+H	C9H17NO4	48.7	47.5	-2.02095	9.15214	1.02081e-06	1.34215e-05	-1.0519	0.482333	3.12613e+06	6.48126e+06	3.77586e+06	2.50935e+06	2.61081e+06	4.8769e+06	3.12625e+06	3.98661e+06	2.2065e+06	3.08838e+06	2.55424e+06	2.5264e+06	6.59281e+06	6.85109e+06	4.32528e+06	7.98976e+06	6.6444e+06	7.73877e+06	6.79556e+06	5.47905e+06	5.91464e+06
1.17_365.0500m/z	365.05	1.16703	neg	Phosphoribosyl formamidocarboxamide	HMDB0001439	Nucleosides, nucleotides, and analogues	Imidazole ribonucleosides and ribonucleotides	1-ribosyl-imidazolecarboxamides	M-H	C10H15N4O9P	53.6	73.6	-1.0552	2.47638	7.4748e-10	6.14351e-08	-1.06928	0.476558	212656	446232	297868	177031	210217	289165	204198	209266	198928	190531	154331	195023	432270	389325	433863	432310	487942	439581	462087	426930	511784
9.65_567.3320n	568.339	9.64508	pos	LysoPC(22:6(4Z,7Z,10Z,13Z,16Z,19Z))	HMDB0010404	Lipids and lipid-like molecules	Glycerophospholipids	Glycerophosphocholines	M+H, M+Na	C30H50NO7P	57.9	92.5	-0.938733	4.02177	0.0207496	0.0410261	-1.0708	0.476054	964351	2.02572e+06	617370	882669	740148	1.86448e+06	1.79405e+06	404244	413766	519766	761723	1.64529e+06	2.1433e+06	1.85212e+06	4.82671e+06	1.54695e+06	2.38791e+06	1.98207e+06	817907	1.72889e+06	945592
1.14_303.0832m/z	303.083	1.1391	neg	N-Acetylaspartylglutamic acid	44358	Organic acids and derivatives	Carboxylic acids and derivatives	Amino acids, peptides, and analogues	M-H	C11H16N2O8	47.4	43.9	-0.685911	1.50295	0.000471316	0.00189291	-1.07742	0.473876	93757.6	197853	168866	64608	14837.2	185341	185472	70736.8	31768.4	69379.9	116581	29984.4	235041	153883	155650	218935	174709	201950	229162	187910	223435
0.79_241.0116m/z	241.012	0.78905	neg	1D-myo-Inositol 3-phosphate	HMDB0006814	Organic oxygen compounds	Organooxygen compounds	Alcohols and polyols	M-H2O-H	C6H13O9P	38.2	0	-1.06472	1.20039	9.77981e-06	8.04243e-05	-1.08188	0.472414	55640	117778	74590.6	41964.8	65060.7	97521.4	72346.4	50119.6	55447.5	42122.4	12460.7	44766	116212	126932	90322.9	105016	105761	129799	159942	105225	120793
3.58_331.0817n	332.089	3.5786	pos	Malvidin	LMPK12010004	Lipids and lipid-like molecules	Polyketides	Flavonoids	M+H, M+Na, M+H-H2O	C17H15O7+	44	29.3	-0.219506	2.6361	1.73586e-05	0.000129043	-1.085	0.471391	297319	630727	172324	333370	142189	179142	187070	354844	393157	533358	371759	305978	724182	399897	704393	655742	572304	707504	692760	739937	479823
0.73_145.1101n	184.073	0.733317	pos	3-Dehydroxycarnitine	HMDB0006831	Lipids and lipid-like molecules	Fatty Acyls	Fatty acids and conjugates	M+H, M+K	C7H15NO2	49.4	52.4	-1.16071	7.0127	8.48816e-07	1.15543e-05	-1.09263	0.468905	1.75858e+06	3.7504e+06	1.46887e+06	1.0117e+06	1.37835e+06	2.35292e+06	1.86762e+06	3.15802e+06	1.73896e+06	1.70394e+06	1.35218e+06	1.55327e+06	2.63072e+06	3.41702e+06	3.58244e+06	4.21371e+06	4.34685e+06	3.92037e+06	4.31868e+06	3.72561e+06	3.59823e+06
1.12_258.1078m/z	258.108	1.12177	pos	Norophthalmic acid	HMDB0005766	Organic acids and derivatives	Carboxylic acids and derivatives	Amino acids, peptides, and analogues	M+H-H2O	C10H17N3O6	35	0	-2.42771	1.1367	0.000354666	0.00150419	-1.10168	0.465975	57336.4	123046	82554.1	67871.2	41966.6	72850.6	49053.8	54422.7	56692.2	56153.5	37221.8	54577.4	193245	183588	58460.7	101175	94931.2	153823	102662	101758	117772
0.71_132.0534n	265.111	0.705617	pos	N-Carbamoylsarcosine	HMDB0012265	Organic acids and derivatives	Carboxylic acids and derivatives	Amino acids, peptides, and analogues	M+Na, M+K, 2M+H	C4H8N2O3	39.3	0.106	-1.06852	1.99822	8.12112e-07	1.11775e-05	-1.14245	0.45299	130911	288992	167055	105731	132629	183903	149434	157195	104140	117579	101496	89945.3	221811	287794	297601	387839	201304	312266	341224	291499	259593
0.72_295.0840m/z	295.084	0.71935	neg	4-Carboxynevirapine	HMDB0060759	Organic nitrogen compounds	Organonitrogen compounds	Amines	M-H	C15H12N4O3	37.6	0	0.968933	1.03053	0.000451288	0.00182813	-1.15419	0.449319	41935	93330.2	49779.1	46961.6	41533.3	50304.1	73868.3	74659.6	16731.5	25412.6	16485.2	23614.7	54722.6	106729	82015.1	89931.5	71136.8	55596.7	117051	130590	132198
9.76_612.3308m/z	612.331	9.7603	neg	PC(22:6(4Z,7Z,10Z,13Z,16Z,19Z)/0:0)	LMGP01050056	Lipids and lipid-like molecules	Glycerophospholipids	Glycerophosphocholines	M+FA-H	C30H50NO7P	56.4	82.8	0.21971	2.588	0.00445121	0.011601	-1.15921	0.447757	317277	708591	231534	344882	233976	475871	375525	245709	214697	222673	179961	647940	942163	673744	1.43248e+06	490814	868876	721888	335639	583063	328652
1.15_283.0915n	282.084	1.15305	neg	Guanosine	87	Nucleosides, nucleotides, and analogues	Purine nucleosides	Unclassified	M-H, 2M-H, M+FA-H	C10H13N5O5	55.5	82.7	-0.473741	2.45194	1.5902e-05	0.000120058	-1.17459	0.443009	204711	462091	303586	180771	158990	315616	181709	209648	194203	176024	133599	192960	228986	389639	459421	641107	525185	540051	472241	357997	544194
0.78_871.1741m/z	871.174	0.775083	neg	7-Chloro-3,3',4',5,6,8-hexamethoxyflavone	HMDB0032658	Phenylpropanoids and polyketides	Flavonoids	O-methylated flavonoids	2M-H	C21H21ClO8	32	0	-4.12167	1.1794	6.9348e-06	6.11405e-05	-1.19391	0.437117	45687.1	104519	51436.4	24097.9	43404	64836	45139.2	83645.1	66010.7	54621.8	8819.67	14860.7	80416.7	119532	104842	113549	90880.3	97912.9	114539	124984	94018.2
2.54_493.1470m/z	493.147	2.5442	pos	alpha-CEHC glucuronide	HMDB0062445	Unclassified	Unclassified	Unclassified	M+K	C22H30O10	38.4	0	-0.0639752	1.1219	7.91733e-05	0.000446511	-1.2181	0.429847	44726.5	104052	45129.7	31029	43432.6	72893.2	63284	24371.7	39418.4	57003	28942.4	41760.8	90427.5	126499	44183.9	125568	86650.4	153708	127047	83509.5	98874.2
1.13_611.1446m/z	611.145	1.12517	neg	Glutathione, oxidized	45	Unclassified	Unclassified	Unclassified	M-H	C20H32N6O12S2	47.5	43.4	-0.143757	11.4734	3.53233e-08	1.21543e-06	-1.2331	0.425402	3.73354e+06	8.77651e+06	5.09712e+06	1.78033e+06	3.8675e+06	5.56214e+06	4.30844e+06	5.05327e+06	3.21804e+06	3.04118e+06	2.76689e+06	2.6405e+06	7.86485e+06	8.87356e+06	7.48382e+06	9.02807e+06	8.16708e+06	7.57224e+06	1.01434e+07	9.78482e+06	1.00707e+07
0.66_296.0657m/z	296.066	0.664033	pos	5'-phosphoribosyl-a-N-formylglycineamidine	HMDB0002305	Organic oxygen compounds	Organooxygen compounds	Carbohydrates and carbohydrate conjugates	M+H-H2O	C8H16N3O8P	37.8	0.246	4.76957	2.53932	4.25262e-06	4.14088e-05	-1.23501	0.424839	205701	484187	284252	148257	198661	228007	177334	249087	278528	211504	125349	156035	292407	461380	325756	491552	604423	633938	563984	560176	424065
1.17_267.0734m/z	267.073	1.16703	neg	Inosine	84	Nucleosides, nucleotides, and analogues	Purine nucleosides	Unclassified	M-H	C10H12N4O5	55.7	80.3	-0.241187	13.3658	3.53976e-10	3.46817e-08	-1.27194	0.414103	4.77434e+06	1.15293e+07	6.71038e+06	4.05931e+06	4.38331e+06	6.81788e+06	4.50494e+06	4.74846e+06	4.77234e+06	4.18722e+06	3.22658e+06	4.33297e+06	9.19546e+06	1.09199e+07	1.10067e+07	1.22948e+07	1.19873e+07	1.17419e+07	1.24232e+07	1.10238e+07	1.3171e+07
10.75_507.2729m/z	507.273	10.7458	neg	1-(11Z,14Z-eicosadienoyl)-glycero-3-phosphate	HMDB0062303	Lipids and lipid-like molecules	Glycerophospholipids	Glycerophosphates	M+FA-H	C23H43O7P	38	0	0.166612	1.10683	0.000121044	0.00062667	-1.27212	0.41405	40136.2	96935.6	31281	41559.4	25161.7	59021	41293.3	21608.3	25617.6	32594.9	55810.7	67414.7	92031.4	106933	166250	100248	108738	104277	58106.1	66444.8	69393.7
0.76_611.1447m/z	611.145	0.7611	neg	Oxidized glutathione	HMDB0003337	Organic acids and derivatives	Carboxylic acids and derivatives	Amino acids, peptides, and analogues	M-H	C20H32N6O12S2	56.1	86.3	0.0786594	12.6639	6.61334e-09	3.5073e-07	-1.28483	0.410418	4.29127e+06	1.04558e+07	5.27434e+06	2.73835e+06	3.72712e+06	6.43014e+06	5.18652e+06	4.86904e+06	4.93803e+06	4.38791e+06	2.50581e+06	2.85543e+06	8.23295e+06	1.16606e+07	1.00524e+07	1.17305e+07	8.9934e+06	1.05855e+07	1.13087e+07	1.00876e+07	1.14509e+07
11.66_300.2892m/z	300.289	11.662	pos	Palmitoyl Ethanolamide	43210	Unclassified	Unclassified	Unclassified	M+H	C18H37NO2	55.3	82.4	-1.71795	1.55196	0.000213852	0.000990794	-1.29856	0.406532	76888.7	189133	52465	65099.1	58420.2	106628	92546.2	38108.3	51271.3	47136.9	109931	147282	189027	236681	301675	201148	246203	132775	96125.2	177875	120687
1.13_176.0314n	351.057	1.12517	neg	Ascorbic acid	HMDB0000044	Organoheterocyclic compounds	Dihydrofurans	Furanones	M+FA-H, 2M-H	C6H8O6	50	57	-3.84998	1.52216	8.0659e-07	1.11739e-05	-1.31722	0.401307	65237.6	162563	61046.8	53484.3	67794.3	79321.2	51899.9	76062.7	62471.8	63336.5	69125.8	67832.9	169790	182729	82148	161005	201319	196709	201232	135652	132480
1.12_306.0752n	613.158	1.12177	pos	(+)-Gallocatechin	HMDB0038365	Phenylpropanoids and polyketides	Flavonoids	Flavans	M+H, 2M+H	C15H14O7	41.6	17	4.18261	19.8985	4.07757e-08	1.34692e-06	-1.34761	0.392944	1.00961e+07	2.56934e+07	9.33472e+06	4.79578e+06	8.32589e+06	1.34376e+07	1.45728e+07	1.58606e+07	9.90991e+06	1.14166e+07	5.83198e+06	7.4748e+06	2.11552e+07	2.70815e+07	1.97384e+07	3.12136e+07	2.85984e+07	2.752e+07	2.55615e+07	2.50956e+07	2.52767e+07
0.75_351.0569m/z	351.057	0.747133	neg	D-Glucurono-6,3-lactone	HMDB0006355	Organoheterocyclic compounds	Furofurans	Isosorbides	2M-H	C6H8O6	39.5	0	0.118759	2.47846	1.77294e-08	7.26864e-07	-1.37983	0.384264	152447	396724	133604	131386	126488	186004	160140	177719	167444	131114	140351	170214	456675	500779	287311	420205	365784	408027	474964	305811	350956
0.79_206.0418n	205.035	0.78905	neg	Homocitric acid	HMDB0003518	Organic acids and derivatives	Carboxylic acids and derivatives	Tricarboxylic acids and derivatives	M-H2O-H, M-H	C7H10O7	37.5	0	-4.28615	1.34424	1.51561e-07	3.38708e-06	-1.39554	0.380102	45855.5	120640	54325.1	46074.9	44270.4	48931.5	42266.5	32897.2	56366.7	54861.2	38209.6	40351.7	104228	133853	98522.2	150969	90271.3	156736	145870	90659.6	114651
10.56_639.2767m/z	639.277	10.5592	neg	Hildgardtene	LMPK12020282	Lipids and lipid-like molecules	Polyketides	Flavonoids	2M-H	C21H20O3	38.8	0	2.38328	1.43048	0.000229945	0.00104829	-1.39751	0.379583	57065.8	150338	53859.8	55430.3	44335.2	141158	58668.3	32257.2	35777.4	30435.2	31397.1	87339.1	118026	159395	257446	144992	197817	108162	83777.2	158685	124741
0.75_744.2275m/z	744.228	0.747167	pos	Prunin 3'',6''-di-p-coumarate	LMPK12140247	Lipids and lipid-like molecules	Polyketides	Flavonoids	M+NH4	C39H34O14	34.9	0	-1.5599	2.2915	0.0142351	0.030194	-1.4019	0.37843	202209	534338	574345	310728	199487	275743	169402	100196	53195.7	146828	114549	77622	1.05036e+06	1.11572e+06	496983	326973	7.93017e-07	435557	562645	399819	420978
12.39_719.5689m/z	719.569	12.3926	pos	PE(16:1(9Z)/P-18:0)	HMDB0008983	Lipids and lipid-like molecules	Glycerophospholipids	Glycerophosphoethanolamines	M+NH4	C39H76NO7P	46.2	62.8	-1.27433	10.5179	4.15235e-05	0.000261759	-1.41187	0.375825	3.09071e+06	8.22378e+06	3.18277e+06	3.12794e+06	3.13373e+06	2.92174e+06	2.85679e+06	3.55981e+06	4.46127e+06	1.80954e+06	1.70458e+06	4.14889e+06	3.17754e+06	5.02269e+06	7.59368e+06	9.76813e+06	1.19729e+07	7.62214e+06	1.14782e+07	8.45724e+06	8.92151e+06
11.41_600.4017m/z	600.402	11.4058	pos	LysoPC(22:1(13Z))	HMDB0010399	Unclassified	Unclassified	Unclassified	M+Na	C30H60NO7P	50.2	59.1	3.01834	1.60988	0.00150223	0.00481724	-1.418	0.374232	78846.9	210690	63708.1	59062.2	43039.3	162277	120277	35581	34726.9	37054.3	61462.9	171281	260385	220956	384366	200877	284938	142439	77156.7	224303	100792
0.86_606.0746m/z	606.075	0.858783	neg	Uridine diphosphate-N-acetylglucosamine	41549	Nucleosides, nucleotides, and analogues	Pyrimidine nucleotides	Pyrimidine nucleotide sugars	M-H	C17H27N3O17P2	54.5	75.1	0.505012	8.56985	6.31974e-07	9.40745e-06	-1.42401	0.372674	1.77972e+06	4.77553e+06	1.84895e+06	886003	1.63431e+06	2.33396e+06	2.89946e+06	3.08431e+06	1.33457e+06	1.15228e+06	1.08422e+06	1.53911e+06	3.98887e+06	3.61301e+06	3.7589e+06	4.53656e+06	5.85019e+06	4.35848e+06	5.79672e+06	6.00267e+06	5.07439e+06
0.79_289.0327m/z	289.033	0.78905	neg	Fucose 1-phosphate	HMDB0001265	Organic oxygen compounds	Organooxygen compounds	Carbohydrates and carbohydrate conjugates	M+FA-H	C6H13O8P	46.6	40.2	-1.33746	2.5192	1.12145e-08	5.3429e-07	-1.44393	0.367564	144702	393678	163003	85264.3	142743	196913	173768	148837	122051	128565	152076	133803	321629	270896	389128	383741	470591	365786	481516	398699	461119
0.73_315.1422m/z	315.142	0.733317	pos	4-Methyl-4-(methylthio)-2-pentanone	HMDB0037621	Organooxygen compounds	Carbonyl compounds	Ketones	2M+Na	C7H14OS	38.5	0	-0.348437	4.74002	2.42816e-07	4.74203e-06	-1.45835	0.363908	511198	1.40474e+06	486428	297716	347628	873033	572468	602424	598831	468225	300373	564854	1.12198e+06	1.22514e+06	1.32566e+06	1.77163e+06	1.96414e+06	1.22444e+06	1.53854e+06	1.24284e+06	1.22833e+06
0.72_147.0480m/z	147.048	0.71935	neg	Methyl 4-(methylthio)butyrate	HMDB0037619	Lipids and lipid-like molecules	Fatty Acyls	Fatty acid esters	M-H	C6H12O2S	37.6	0	-3.55256	1.67327	7.80498e-13	1.23049e-09	-1.51832	0.349093	55409.4	158724	73819.3	49709.1	52781.5	69568.3	60483.3	50863.8	47784.6	48227.9	52339.4	48516.8	145604	162257	140104	187938	150799	160487	170804	153765	156757
10.17_569.3474n	570.355	10.1695	pos	LysoPC(22:5(4Z,7Z,10Z,13Z,16Z))	HMDB0010402	Unclassified	Unclassified	Unclassified	M+H, M+Na	C30H52NO7P	57.9	93.5	-1.2837	8.72476	0.00397906	0.0105793	-1.52036	0.348598	2.26602e+06	6.50038e+06	1.70117e+06	2.32841e+06	1.64432e+06	4.90453e+06	4.02695e+06	1.0645e+06	1.06965e+06	1.23195e+06	1.37042e+06	3.31828e+06	9.05697e+06	6.08532e+06	1.48408e+07	5.91731e+06	7.12403e+06	5.6994e+06	2.18703e+06	4.98774e+06	2.60484e+06
1.71_297.1072n	296.1	1.71432	neg	1-Methylguanosine	HMDB0001563	Nucleosides, nucleotides, and analogues	Purine nucleosides	Unclassified	M-H, M+FA-H	C11H15N5O5	48.4	46.9	-0.474817	1.15667	1.88973e-06	2.18623e-05	-1.52996	0.346287	30486	88036.8	41812.7	24837	25073.1	41704.5	31839.9	24281.2	33407.8	33294.2	21873.1	26736.6	85628.3	104598	65276.7	92865.1	91871.5	139638	81789.7	52874.9	77789.3
0.80_113.0000m/z	113	0.802733	pos	Propionic acid	LMFA01010003	Lipids and lipid-like molecules	Fatty Acyls	Fatty Acids and Conjugates	M+K	C3H6O2	39	0	1.02424	1.11613	0.00287242	0.00810784	-1.53391	0.34534	37579	108817	5885.74	7590.16	55350.4	53194.3	50122.8	22489.6	42740	53156.2	55609.1	29651.5	19540.2	16989.5	178096	158579	62319.7	113976	125241	139257	165360
10.31_313.2731m/z	313.273	10.3114	pos	MG(16:0/0:0/0:0)[rac]	LMGL01010001	Lipids and lipid-like molecules	Glycerolipids	Monoradylglycerols	M+H-H2O	C19H38O4	37.8	0	-1.7976	1.80412	1.06906e-06	1.39501e-05	-1.53578	0.344892	69194.1	200625	65143.1	57095.5	48415.7	140292	74680.6	50568.1	64217.6	50479.8	53357	87691.9	152097	185621	299280	203312	240911	186468	142371	219809	175758
1.69_298.1142m/z	298.114	1.69478	pos	Nelarabine	85183	Nucleosides, nucleotides, and analogues	Purine nucleosides	Unclassified	M+H	C11H15N5O5	56.4	87.7	-1.36018	2.49139	8.67821e-06	7.29508e-05	-1.54906	0.341733	144315	422303	220897	127352	116255	172160	136646	95008.6	162944	187018	102063	122806	473961	539906	265415	467435	384420	677520	391694	256383	343989
0.64_606.0747m/z	606.075	0.635733	neg	UDP-GlcNAc	LMSL01010002	Lipids and lipid-like molecules	Saccharolipids	Acylaminosugars	M-H	C17H27N3O17P2	38.2	0	0.670539	1.42753	1.47015e-08	6.40585e-07	-1.55976	0.339207	40329.4	118893	46514.8	22548.1	30584.1	63301.8	63678.7	59458.8	38226.1	27393	17422.5	34166.2	106665	123914	103592	109419	145530	113785	123657	144537	98941
0.66_228.0637m/z	228.064	0.66385	neg	Asparaginyl-Aspartic acid	HMDB0028727	Organic acids and derivatives	Carboxylic acids and derivatives	Amino acids, peptides, and analogues	M-H2O-H	C8H13N3O6	43.5	30.7	4.39999	1.85494	3.5703e-11	7.11679e-09	-1.57778	0.334998	64222.4	191710	77764.5	39103.8	49380.1	105053	85782.7	64076.5	61340.7	55806.4	49552.9	54363.3	166670	213877	195808	190262	210215	162901	198128	192200	195330
1.50_297.1069n	298.114	1.49607	pos	7-Methylguanosine	64620	Nucleosides, nucleotides, and analogues	Purine nucleosides	Unclassified	M+H, M+Na	C11H15N5O5	54	75.6	-1.42167	2.72026	1.59097e-06	1.90017e-05	-1.59133	0.331866	156823	472549	229355	137421	132871	182418	132214	136463	179569	191562	122425	123928	423253	578303	324214	570813	422235	737272	471031	326276	399540
0.72_301.1517m/z	301.152	0.71945	pos	L-Leucine	HMDB0000687	Organic acids and derivatives	Carboxylic acids and derivatives	Amino acids, peptides, and analogues	2M+K	C6H13NO2	37.9	0	-2.77207	1.18534	1.86657e-06	2.16233e-05	-1.62461	0.324298	30476.3	93976.1	25196.3	24996.3	30221.7	14529.8	19977.8	27760.5	56206.5	47361.2	19048.7	39464	65050.5	109786	48336.6	85678.9	119656	88402.1	114009	97252.2	117614
1.16_314.1453m/z	314.145	1.16343	pos	Ethyl 3-mercaptobutyrate	HMDB0032271	Lipids and lipid-like molecules	Fatty Acyls	Fatty acid esters	2M+NH4	C6H12O2S	38.8	0	-0.399085	1.79718	1.58603e-07	3.49491e-06	-1.62762	0.323623	63061.3	194861	47463	38892.6	40102.9	94188.5	65312.7	118407	77865.3	60654.6	29247.5	58479.4	137231	162184	252836	186779	232721	242123	185046	163329	191497
10.15_614.3464m/z	614.346	10.1497	neg	PC(22:5(7Z,10Z,13Z,16Z,19Z)/0:0)	LMGP01050143	Lipids and lipid-like molecules	Glycerophospholipids	Glycerophosphocholines	M+FA-H	C30H52NO7P	56	81.8	0.0967113	3.52935	0.0050969	0.0129215	-1.64079	0.320681	334382	1.04273e+06	263388	347095	235446	780279	581599	180910	153404	163892	170470	467340	1.47027e+06	983374	2.50049e+06	822794	1.32053e+06	832678	319814	728472	406108
0.86_219.0140m/z	219.014	0.858783	neg	cis-Aconitic acid	HMDB0000072	Organic acids and derivatives	Carboxylic acids and derivatives	Tricarboxylic acids and derivatives	M+FA-H	C6H6O6	38.1	0	-3.76271	1.00031	2.06462e-08	8.19327e-07	-1.64792	0.319101	18431.7	57761.5	25271.5	13433	19272	35674.1	22168.6	15418.3	17204.1	16763	7020.79	12091.8	57951.8	65796.5	42690.5	56659.2	51627.1	60215.4	73788.2	47657	63467.4
0.64_866.6934m/z	866.693	0.636133	pos	PC(P-20:0/21:0)	LMGP01030099	Lipids and lipid-like molecules	Glycerophospholipids	Glycerophosphocholines	M+Na	C49H98NO7P	33.7	0	-4.6861	1.7453	1.43913e-07	3.24544e-06	-1.64839	0.318996	56305.3	176508	82334.5	28673.5	30458.3	73234.4	60500.1	136663	37754.3	55291.1	37182.6	20961.1	186977	184173	153802	176765	151770	146077	226935	169903	192170
9.97_531.3272m/z	531.327	9.97058	pos	MG(10:0/0:0/0:0)	HMDB0072866	Lipids and lipid-like molecules	Glycerolipids	Monoradylglycerols	2M+K	C13H26O4	36.6	0	-4.51215	1.24605	2.36802e-07	4.65075e-06	-1.67519	0.313124	28583	91283.3	33068.8	30386.8	30963.7	31702.2	25304	43900.8	16624	30522.5	13296.2	30061.2	66779.7	54921.8	103292	111472	113723	68806.5	108941	104585	89029.5
4.03_233.1260n	234.133	4.02672	pos	Hydroxypropionylcarnitine	LMFA07070074	Lipids and lipid-like molecules	Fatty Acyls	Fatty esters	M+H, M+Na	C10H19NO5	48	44.3	-1.1702	1.13467	3.02297e-05	0.000201787	-1.68553	0.310889	26579.3	85494.7	44823.7	28922.3	25228.1	30859	24792.2	21312.3	20987.1	28013.9	16893	23961.7	64884.4	64450.3	48660.1	117761	43630.9	112531	132162	80929.4	104444
0.77_284.0985m/z	284.098	0.774933	pos	3-oxo-3-[(3,4,5,6-tetrahydroxyoxan-2-yl)methoxy]propanoic acid	HMDB0125085	Organic oxygen compounds	Organooxygen compounds	Carbohydrates and carbohydrate conjugates	M+NH4	C9H14O9	37.2	0	3.33311	2.18777	4.70545e-07	7.51289e-06	-1.71586	0.304422	86809.6	285162	111920	63131	75394.9	125462	85046.3	74358.8	93321.1	88202.1	71841.1	79418.6	186393	203976	211435	354464	255596	371406	396984	276247	309958
0.64_189.1596m/z	189.16	0.636133	pos	N6,N6,N6-Trimethyl-L-lysine	HMDB0001325	Organic acids and derivatives	Carboxylic acids and derivatives	Amino acids, peptides, and analogues	M+H	C9H20N2O2	50	54.6	-0.842103	1.75537	2.02179e-06	2.30519e-05	-1.73341	0.300739	54992.7	182858	51378.3	42818.1	50543.1	42657.7	43208.5	57698	52377.7	46961.4	123876	38407.4	167215	200158	129027	215270	285709	162887	143087	214436	127935
1.81_282.1193m/z	282.119	1.80938	pos	1-Methyladenosine	6888	Nucleosides, nucleotides, and analogues	Purine nucleosides	Unclassified	M+H	C11H15N5O4	53.3	73.7	-1.27032	1.07655	1.07576e-08	5.22574e-07	-1.75638	0.295991	19539.5	66013.9	7460.04	16714.4	17976.2	38121.7	23755.8	15966.2	24257	19003.2	15248.3	16892.1	82071.3	63492.9	48061.5	68233.7	54082.4	84106	65115.8	66540.6	62420.8
5.05_336.1661m/z	336.166	5.0535	pos	Isopentenyl adenosine	64086	Unclassified	Unclassified	Unclassified	M+H	C15H21N5O4	54.8	80.9	-1.51651	1.05176	3.13732e-05	0.000207424	-1.77114	0.292978	20646	70469.4	35598.2	16229.6	15777.9	30868.6	23526.6	14951.8	18401.2	22107.8	14793.6	14204.3	68673.7	93246.8	45671	93938.9	65470.3	120657	58641.6	37441.8	50484.2
10.30_569.3475n	570.355	10.2972	pos	LysoPC(22:5(7Z,10Z,13Z,16Z,19Z))	HMDB0010403	Lipids and lipid-like molecules	Glycerophospholipids	Glycerophosphocholines	M+H, M+Na	C30H52NO7P	57.5	90.2	-1.13246	12.0191	8.68182e-05	0.000479949	-1.83496	0.280299	2.61314e+06	9.32268e+06	2.02795e+06	2.58112e+06	1.66706e+06	4.47542e+06	3.38313e+06	1.49528e+06	1.94193e+06	1.96903e+06	1.70837e+06	4.88205e+06	1.42846e+07	8.70875e+06	1.62841e+07	9.22577e+06	9.65745e+06	8.82008e+06	4.2535e+06	8.33238e+06	4.3375e+06
0.76_366.0562n	365.05	0.7611	neg	5-formamido-1-(5-phospho-D-ribosyl)imidazole-4-carboxamide(2-)	HMDB0062708	Unclassified	Unclassified	Unclassified	M-H2O-H, M-H	C10H15N4O9P	33	0	-4.08494	2.74224	3.59093e-10	3.47899e-08	-1.83784	0.27974	110847	396250	121797	113167	123761	232934	85529.7	97816.7	114830	73056.8	55354.4	90222.6	342938	415845	412332	416887	292424	436299	428008	386644	434876
2.76_312.1297m/z	312.13	2.76368	pos	1,7-Dimethylguanosine	HMDB0001961	Nucleosides, nucleotides, and analogues	Purine nucleosides	Unclassified	M+H	C12H17N5O5	56.3	88.3	-1.76685	2.51854	3.82763e-06	3.82391e-05	-1.8439	0.278567	107396	385532	138521	86853.1	96559	137930	108011	77547.4	130084	141726	70146	86586.4	377399	457909	235936	471553	357190	647593	382647	246064	293496
0.76_400.1570m/z	400.157	0.761033	pos	N-Acetyl-L-methionine	HMDB0011745	Organic acids and derivatives	Carboxylic acids and derivatives	Amino acids, peptides, and analogues	2M+NH4	C7H13NO3S	38.5	0	-0.21746	3.51444	2.52135e-09	1.62547e-07	-1.89049	0.269715	174565	647221	323832	208477	164350	304610	143011	100943	132913	127748	101657	138114	643166	750154	557689	652512	460399	696584	800371	674674	589439
0.72_117.0791n	118.086	0.71945	pos	L-Valine	35	Organic acids and derivatives	Carboxylic acids and derivatives	Amino acids, peptides, and analogues	M+H, 2M+H	C5H11NO2	49.5	54.2	0.849988	19.9464	1.41868e-12	1.44722e-09	-1.89711	0.26848	5.61366e+06	2.0909e+07	4.33762e+06	4.39298e+06	5.77701e+06	5.52332e+06	5.59733e+06	6.95806e+06	6.81986e+06	6.74763e+06	4.37119e+06	5.61157e+06	1.73994e+07	1.99542e+07	1.68753e+07	2.09616e+07	2.2975e+07	2.28362e+07	2.39115e+07	2.12999e+07	2.19681e+07
1.15_551.1724n	550.165	1.15305	neg	Haloperidol glucuronide	HMDB0060904	Organic oxygen compounds	Organooxygen compounds	Carbohydrates and carbohydrate conjugates	M-H, M+FA-H	C27H31ClFNO8	34.1	2.39	0.336668	4.96953	9.30754e-08	2.46054e-06	-1.90144	0.267676	357382	1.33513e+06	615867	246841	282267	715266	354779	305310	337407	277747	157063	281271	721003	1.18257e+06	1.23264e+06	1.62083e+06	1.49437e+06	1.69484e+06	1.40924e+06	1.14765e+06	1.51301e+06
1.90_250.0931m/z	250.093	1.89542	pos	Zidovudine	HMDB0014638	Nucleosides, nucleotides, and analogues	Pyrimidine nucleosides	Pyrimidine 2',3'-dideoxyribonucleosides	M+H-H2O	C10H13N5O4	47.9	53.6	-1.519	2.90901	6.15968e-08	1.80746e-06	-1.94806	0.259165	117463	453238	193591	88708.1	96841.7	200295	112006	89493.8	124919	112341	66274.9	90161.3	244753	506611	349073	525126	389156	596978	510567	484482	472393
0.76_269.0876m/z	269.088	0.761033	pos	Methyl 3-(methylthio)propanoate	HMDB0034377	Organic acids and derivatives	Carboxylic acids and derivatives	Carboxylic acid derivatives	2M+H	C5H10O2S	38.7	0	-0.0533457	4.5111	5.98664e-09	3.23428e-07	-1.95398	0.258103	278273	1.07815e+06	339100	234809	244759	362640	252763	351525	316150	222502	189365	269116	729180	838946	833571	1.16866e+06	1.27369e+06	1.11092e+06	1.42355e+06	1.18308e+06	1.14173e+06
0.73_482.1711m/z	482.171	0.73325	neg	Fluphenazine	HMDB0014761	Organoheterocyclic compounds	Benzothiazines	Phenothiazines	M+FA-H	C22H26F3N3OS	34	0	-4.56857	1.04152	2.98575e-09	1.87605e-07	-1.97024	0.255211	13836.1	54214.6	28965.1	7774.19	7385.59	24629	16466.4	13710	5953.74	13082.2	11924.6	8470.7	51181.5	58856.8	63391.9	70121.5	48363.6	47745.6	48296.4	47587.6	52386.5
0.98_228.0637m/z	228.064	0.979583	neg	Aspartyl-Asparagine	HMDB0028748	Organic acids and derivatives	Carboxylic acids and derivatives	Amino acids, peptides, and analogues	M-H2O-H	C8H13N3O6	43.2	29	4.51533	1.13264	5.84571e-11	9.47442e-09	-2.00087	0.249849	15989.7	63997.3	22292.1	12258.9	9992.11	27801.2	19664.9	13251.2	15344.7	13337.7	12309.6	13644.4	60901.7	74780.5	51992.5	71347.3	77113.9	58569.5	65530.6	55198.4	60541.4
0.72_249.1553m/z	249.155	0.71945	pos	Asparaginyl-Valine	HMDB0028744	Organic acids and derivatives	Carboxylic acids and derivatives	Amino acids, peptides, and analogues	M+NH4	C9H17N3O4	49.6	52.8	-1.74947	13.5227	1.70944e-10	1.9649e-08	-2.00118	0.249796	2.34855e+06	9.40189e+06	2.92858e+06	2.25373e+06	2.05444e+06	2.85906e+06	2.24927e+06	2.40041e+06	2.63016e+06	2.60119e+06	1.39653e+06	2.11217e+06	1.18815e+07	1.14618e+07	6.59441e+06	9.59348e+06	9.27589e+06	9.10007e+06	9.55619e+06	9.08041e+06	8.07325e+06
17.46_783.5773n	806.567	17.464	pos	PC(16:0/20:3(8Z,11Z,14Z))	HMDB0007981	Unclassified	Unclassified	Unclassified	M+Na, M+K, M+H-H2O	C44H82NO8P	51.6	71.5	-0.590472	4.27529	0.0228665	0.0444663	-2.00598	0.248965	458789	1.84278e+06	242747	373568	662195	579537	404091	390110	548727	569157	379041	438715	584134	440902	135557	1.15383e+06	3.00211e+06	1.07276e+06	5.39573e+06	1.30916e+06	3.49085e+06
1.17_536.1615n	535.154	1.16703	neg	1,4-beta-D-Glucan	HMDB0006944	Organic oxygen compounds	Organooxygen compounds	Carbohydrates and carbohydrate conjugates	M-H, M+FA-H	C18H32O18	52.5	71.4	4.86876	15.1813	6.48329e-11	1.01291e-08	-2.04661	0.242052	2.77035e+06	1.14453e+07	4.69077e+06	1.91657e+06	2.30215e+06	5.35946e+06	2.64881e+06	2.40252e+06	2.75564e+06	2.10472e+06	1.30743e+06	2.21546e+06	8.94342e+06	1.09252e+07	9.70162e+06	1.1884e+07	1.18201e+07	1.22036e+07	1.29543e+07	1.15749e+07	1.30003e+07
0.75_304.0608m/z	304.061	0.747133	neg	Cepharadione A	HMDB0034364	Alkaloids and derivatives	Aporphines	4,5-dioxoaporphines	M-H	C18H11NO4	39	9.12	-2.37774	2.24084	1.72973e-07	3.72634e-06	-2.1915	0.218924	55831.4	255026	25623.1	13578.3	27185.8	153313	33870.8	103398	103957	30611.4	2163.93	64612.6	288012	313551	227078	306428	170107	184559	308954	247717	248831
1.12_229.1543m/z	229.154	1.12177	pos	Orciprenaline	HMDB0014954	Benzenoids	Phenols	Benzenediols	M+NH4	C11H17NO3	39.9	6.84	-1.85414	4.69439	8.67413e-12	3.58159e-09	-2.20956	0.2162	230913	1.06805e+06	281772	170884	226435	302708	222269	200294	243857	273257	191329	196326	978988	1.17013e+06	750482	1.16412e+06	1.08701e+06	1.29758e+06	1.09398e+06	1.11384e+06	956348
0.82_333.0505m/z	333.051	0.8169	neg	Nicotinamide ribotide	HMDB0000229	Nucleosides, nucleotides, and analogues	Pyridine nucleotides	Nicotinamide nucleotides	M-H	C11H15N2O8P	37.3	0	3.58468	1.58955	1.75075e-06	2.05146e-05	-2.28359	0.205386	27732.6	135026	42524.4	11192.2	25227.9	67812.8	28635.6	23933	16153.7	19762.3	23825.8	18258.1	125434	77491.4	136571	97202.7	94716.5	125508	190317	156490	211507
0.77_241.1542m/z	241.154	0.774933	pos	Cerulenin	HMDB0015168	Organoheterocyclic compounds	Epoxides	Oxirane carboxylic acids and derivatives	M+NH4	C12H17NO3	38.1	0	-2.14968	3.34766	9.46185e-15	4.10219e-11	-2.35919	0.1949	101197	519224	131557	87350.6	124699	118070	91234.2	102950	93051.3	96211.5	71191.5	95652.9	499871	573057	409270	523651	553157	540767	541683	551279	480278
1.12_503.1497m/z	503.15	1.12177	pos	Eremopetasitenin B2	HMDB0030901	Organoheterocyclic compounds	Naphthofurans	Unclassified	M+K	C24H32O7S	37.1	0	-0.632887	3.94755	1.52709e-08	6.58398e-07	-2.44083	0.184178	133594	725352	219014	44037.2	7.93017e-07	472395	232178	146776	31309.2	69685.1	114618	5923.18	652187	687722	682612	712759	993057	708153	621602	715821	754252
10.33_497.2748n	498.282	10.3255	pos	PS(16:0/0:0)	LMGP03050002	Lipids and lipid-like molecules	Glycerophospholipids	Glycerophosphoserines	M+H, M+Na	C22H44NO9P	53.4	72.2	-1.11475	7.97459	2.87044e-07	5.3526e-06	-2.47494	0.179875	562059	3.12472e+06	380549	509596	400662	890115	639621	290365	572737	499476	759029	678441	2.14932e+06	3.14579e+06	4.93106e+06	3.28052e+06	4.027e+06	2.12824e+06	2.02881e+06	3.66769e+06	2.76409e+06
0.73_367.1387m/z	367.139	0.733317	pos	3,4,5-trihydroxy-6-{[5-(4-methoxyphenyl)-3-oxopentan-2-yl]oxy}oxane-2-carboxylic acid	HMDB0132999	Lipids and lipid-like molecules	Fatty Acyls	Fatty acyl glycosides	M+H-H2O	C18H24O9	36.3	0	-0.218204	2.85836	3.38735e-07	5.91999e-06	-2.49375	0.177545	71315.4	401676	54887.5	14854.9	47239.3	161240	83966.4	154236	50368.2	36341.5	49465.3	60554.9	196694	315592	323707	438364	615328	368609	477216	406589	472984
0.69_223.9717m/z	223.972	0.691783	pos	Phosphoserine	HMDB0000272	Organic acids and derivatives	Carboxylic acids and derivatives	Amino acids, peptides, and analogues	M+K	C3H8NO6P	38.6	0	-1.85421	1.19817	2.58276e-08	9.50959e-07	-2.52018	0.174321	12096.8	69393.9	24303.9	9246.49	9342.47	21848.1	14949.1	2461.52	11301.4	9890.88	8402.93	9221.3	67547.9	83869.5	37856.7	63945.2	48405.5	90340.9	78731.9	85000.6	68846.7
0.71_117.0788n	156.042	0.705617	pos	Betaine	HMDB0000043	Organic acids and derivatives	Carboxylic acids and derivatives	Amino acids, peptides, and analogues	M+K, 2M+K, 2M+Na, M+Na	C5H11NO2	42.9	20.8	-1.7287	7.1985	7.19071e-06	6.30123e-05	-2.57549	0.167764	470072	2.80198e+06	759494	527019	437724	599685	522666	67531.9	442018	734831	354002	255750	3.88624e+06	4.03343e+06	921484	2.29203e+06	1.24962e+06	3.93626e+06	3.28198e+06	2.92836e+06	2.6884e+06
1.98_472.2398m/z	472.24	1.98307	pos	Butyl (S)-3-hydroxybutyrate [arabinosyl-(1->6)-glucoside]	HMDB0039214	Lipids and lipid-like molecules	Fatty Acyls	Fatty acyl glycosides	M+NH4	C19H34O12	37.9	0	1.99635	1.28714	4.28864e-07	6.95267e-06	-2.64755	0.15959	12769.1	80011.8	24022.8	1695.14	4784.79	46464.1	20455.2	5982.79	8954.27	5304.32	6016.81	4010.81	91176.7	99735.3	34288.3	77106.1	70772.7	112462	92567.7	68937.3	73060
2.35_220.1825n	243.17	2.35045	pos	beta-Santalol	HMDB0036716	Lipids and lipid-like molecules	Prenol lipids	Sesquiterpenoids	M+H, M+Na	C15H24O	39	1.57	-1.06027	2.22915	4.8999e-11	8.33079e-09	-2.83587	0.140061	30879.7	220474	46519.8	26469.5	19933	43430.8	26839	41188.8	28601	29839.1	21257.4	24719.1	205330	259203	136846	244553	206874	272277	236404	222382	200394
4.96_184.0732m/z	184.073	4.96093	pos	2-Aminoheptanoate	HMDB0094649	Organic acids and derivatives	Carboxylic acids and derivatives	Amino acids, peptides, and analogues	M+K	C7H15NO2	40	7.52	-1.60874	1.05956	0.0016998	0.0053373	-2.98002	0.126743	8857.97	69889.3	12296.5	9228.33	5546.58	11126.8	8792.78	10844.6	7305.59	7615.44	7218.69	8604.35	158090	85620.1	57332.4	59783.2	148949	28993.8	27522.8	49446.4	13266.8
0.76_321.0693n	320.062	0.7611	neg	Beta-Citryl-L-glutamic acid	HMDB0013220	Organic acids and derivatives	Carboxylic acids and derivatives	Amino acids, peptides, and analogues	M-H, 2M-H, M-H2O-H	C11H15NO10	51.9	62	-0.843166	20.037	2.22366e-11	5.75562e-09	-3.05787	0.120085	2.02079e+06	1.68279e+07	4.1279e+06	781210	296957	7.90966e+06	2.66769e+06	1.19525e+06	765733	868861	1.23661e+06	357990	1.44206e+07	1.9949e+07	1.65942e+07	1.744e+07	1.60788e+07	1.65185e+07	1.85434e+07	1.46959e+07	1.72107e+07
10.81_645.3048m/z	645.305	10.8104	neg	OKHdiA-PG	LMGP20060026	Lipids and lipid-like molecules	Glycerophospholipids	Oxidized glycerophospholipids	M-H2O-H	C31H53O13P	38.1	0	0.372773	2.59226	5.69613e-06	5.24322e-05	-3.17257	0.110908	34610.8	312068	44760.1	7057.79	7.93017e-07	215727	38040.1	5860.37	5873.54	6892.02	1762.66	20134.7	229292	300670	568785	318203	391710	342358	198737	265016	193841
0.76_240.0509m/z	240.051	0.7611	neg	Dopaquinone	HMDB0001229	Organic acids and derivatives	Carboxylic acids and derivatives	Amino acids, peptides, and analogues	M+FA-H	C9H9NO4	38.8	0	-2.38684	2.55978	2.5005e-11	5.85994e-09	-3.24393	0.105555	28543.5	270413	64824.5	10303.8	184.157	120736	37965.4	17895.2	5631.32	11530.4	13024.7	3339.83	238729	331621	257961	288502	246778	263214	288806	235638	282472
0.76_439.1555m/z	439.156	0.761033	pos	1-Isothiocyanato-7-(methylsulfinyl)heptane	HMDB0038441	Organosulfur compounds	Sulfoxides	Unclassified	2M+H	C9H17NOS2	36.4	0	-4.70249	2.63556	6.07594e-08	1.78895e-06	-3.48066	0.0895814	27127.6	302826	72156.1	9482.21	7.93017e-07	93751.5	36905.5	19483.5	10060.5	7.93017e-07	29436.3	7.93017e-07	227027	239618	173401	263077	375308	264936	377261	449203	355603
11.47_483.2729m/z	483.273	11.4741	neg	PG(16:0/0:0)[U]	40874	Unclassified	Unclassified	Unclassified	M-H	C22H45O9P	52.2	66.2	0.0255263	3.54312	4.13509e-06	4.05145e-05	-3.50792	0.0879047	50997	580140	58884.8	27330.6	18062.1	187357	63128.9	16236.3	16746.5	20394.5	50639.9	51190.2	364658	550854	1.11406e+06	432378	814425	468867	351312	640935	483773
0.78_580.0918m/z	580.092	0.775083	neg	Lipoyl-AMP	HMDB0059635	Nucleosides, nucleotides, and analogues	Purine nucleotides	Purine ribonucleotides	M+FA-H	C18H26N5O8PS2	35.1	0	-4.49863	2.33437	1.00269e-09	7.69408e-08	-3.52948	0.0866005	19478	224918	37827.7	7.93017e-07	7.93017e-07	119950	22121.7	6048.52	3556.66	5275.37	7.93017e-07	7.93017e-07	152298	214999	242808	206806	286566	224406	257542	214231	224611
0.77_503.1501m/z	503.15	0.774933	pos	Eremosulphoxinolide A	HMDB0041532	Lipids and lipid-like molecules	Prenol lipids	Terpene lactones	M+K	C24H32O7S	35.2	0	0.191701	2.03062	6.05692e-08	1.78638e-06	-3.60001	0.0824686	14434.7	175033	82295.9	7.93017e-07	7.93017e-07	50993.5	7.93017e-07	7.93017e-07	7.93017e-07	7.93017e-07	11057.8	7.93017e-07	131863	135746	123755	178636	249392	138744	200584	239188	177388
1.09_177.0391m/z	177.039	1.09408	pos	L-Ascorbic acid	249	Organoheterocyclic compounds	Dihydrofurans	Furanones	M+H	C6H8O6	53.6	71.1	-1.2473	2.81143	9.62089e-11	1.28836e-08	-3.62016	0.0813248	26332.4	323793	15740.7	22392.2	17841.1	137277	13210.8	14509.5	25472.2	8745.39	7.93017e-07	8135.09	285448	321038	314166	378608	307073	392946	391343	277674	245843
1.29_451.1190m/z	451.119	1.2882	pos	6-[2-(carboxymethyl)-3,5-dihydroxy-4-(3-methylbut-2-en-1-yl)phenoxy]-3,4,5-trihydroxyoxane-2-carboxylic acid	HMDB0125492	Organic oxygen compounds	Organooxygen compounds	Carbohydrates and carbohydrate conjugates	M+Na	C19H24O11	36.5	0	-4.92672	1.2536	3.62167e-08	1.23151e-06	-3.65599	0.0793297	5234.15	65979.7	4229.73	589.868	7.93017e-07	40029.8	6575.73	7.93017e-07	7.93017e-07	916.403	7.93017e-07	7.93017e-07	37138.6	56546.4	69030.6	81934.9	86998.7	72785.5	74972.7	52646.9	61763
0.76_175.0984m/z	175.098	0.7611	neg	Isobutyric acid	HMDB0001873	Organic acids and derivatives	Carboxylic acids and derivatives	Carboxylic acids	2M-H	C4H8O2	38.2	0	4.4143	1.55782	8.60365e-11	1.22299e-08	-4.00848	0.0621339	6156.21	99079.8	4801.36	9743.94	2021.6	37845.9	7.93017e-07	3164.01	3441.91	7.93017e-07	7.93017e-07	543.447	112711	116283	86840.1	64169.9	101647	100196	118653	90395.5	100823
0.77_471.1270m/z	471.127	0.774933	pos	3-(4-hydroxy-3,5-dimethoxyphenyl)prop-2-enoic acid	HMDB0127488	Unclassified	Unclassified	Unclassified	2M+Na	C11H12O5	37.1	0	1.95419	1.37556	3.95779e-06	3.93104e-05	-4.52735	0.0433644	3699.57	85313.5	16390.2	7.93017e-07	7.93017e-07	20605.5	7.93017e-07	7.93017e-07	7.93017e-07	7.93017e-07	7.93017e-07	7.93017e-07	54147.3	62658.7	28107.2	67697.2	123049	91476.3	78192.9	150027	112466
0.77_469.1296m/z	469.13	0.774933	pos	Lucuminic acid	HMDB0035007	Organic oxygen compounds	Organooxygen compounds	Carbohydrates and carbohydrate conjugates	M+Na	C19H26O12	35.1	0	-4.66849	2.31944	4.77242e-08	1.51188e-06	-4.55833	0.0424431	9614	226515	25482	7.93017e-07	7.93017e-07	70658	7.93017e-07	7.93017e-07	7.93017e-07	7.93017e-07	7.93017e-07	7.93017e-07	134558	173720	165802	239388	187050	326695	317564	203801	290057
10.04_643.2892m/z	643.289	10.0435	neg	PI(22:6(4Z,7Z,10Z,13Z,16Z,19Z)/0:0)	LMGP06050012	Lipids and lipid-like molecules	Glycerophospholipids	Glycerophosphoinositols	M-H	C31H49O12P	47.5	43.8	0.408948	3.85041	8.84557e-09	4.44637e-07	-4.60725	0.0410279	24813.6	604800	47032.2	1853.53	10660.5	145250	18273.8	5814.37	546.732	3586.49	3510.99	11607.9	405380	551704	913723	559396	757645	778065	517294	502169	457823
0.64_855.7083n	836.69	0.635733	neg	PC(P-18:0/24:1(15Z))	HMDB0011264	Unclassified	Unclassified	Unclassified	M-H2O-H, M-H	C50H98NO7P	35.9	0	0.247329	2.36888	1.2159e-10	1.52798e-08	-4.6348	0.0402519	8956.26	222505	13144.1	2.58905	2352.92	30644.9	21337	11145.4	49.9606	2372.23	4579.62	3934	163552	261948	293185	202900	187893	172555	278805	196398	245313
10.04_627.2922m/z	627.292	10.0415	pos	Enterodiol	HMDB0005056	Lignans, neolignans and related compounds	Dibenzylbutane lignans	Dibenzylbutanediol lignans	2M+Na	C18H22O4	38.4	0	-1.04429	2.35612	1.23621e-09	9.16172e-08	-7.06068	0.00749073	1635.56	218345	1036.48	7.93017e-07	7.93017e-07	15319.1	7.93017e-07	7.93017e-07	7.93017e-07	7.93017e-07	7.93017e-07	7.93017e-07	126684	182449	277313	242348	223605	320398	225517	190091	176697
4.83_637.3568m/z	637.357	4.8344	pos	Kurilensoside H	LMST05050017	Lipids and lipid-like molecules	Sterol Lipids	Steroid conjugates	M+Na	C32H54O11	36.6	0	1.49295	1.28153	7.63956e-11	1.12276e-08	-8.13793	0.00355008	228.039	64235.1	282.61	215.755	42.9198	1.02722	12.6751	556.607	250.936	467.898	227.811	222.156	61190	75766.3	47280.2	60541.3	53091.9	94825.9	70836.9	57024.6	57558.4
4.95_735.0779m/z	735.078	4.94537	pos	2,3,4,7,8,9,15,22,23,28-decahydroxy-14-(hydroxymethyl)-13,25,32,35-tetraoxaoctacyclo[14.13.3.3¹⁷,²⁶.0⁵,³⁰.0⁶,¹¹.0¹⁸,²⁶.0¹⁹,²⁴.0²⁹,³³]pentatriaconta-1,3,5(30),6,8,10,19(24),20,22-nonaene-12,27,31,34-tetrone	HMDB0134689	Phenylpropanoids and polyketides	Tannins	Hydrolyzable tannins	M+Na	C32H24O19	32.8	0	-3.44173	1.28168	2.59912e-10	2.68298e-08	-8.42776	0.00290396	186.257	64138.9	259.091	360.989	209.091	7.93017e-07	614.907	7.93017e-07	7.93017e-07	186.811	7.93017e-07	231.68	51757.1	88054.9	48093.4	64965.7	53471	82165.3	79743	48705.4	60294.5
4.90_905.2558m/z	905.256	4.89843	pos	Viniferifuran	HMDB0033646	Phenylpropanoids and polyketides	2-arylbenzofuran flavonoids	Unclassified	2M+H	C28H20O6	34	0	-3.79935	1.35889	9.77797e-12	3.60729e-09	-8.63892	0.00250856	177.591	70794.2	7.93017e-07	7.93017e-07	1340.52	435.393	7.93017e-07	7.93017e-07	7.93017e-07	7.93017e-07	7.93017e-07	7.93017e-07	58004.1	87310.9	74789.4	60373.7	82155.1	84113.6	45824.6	77156.1	67420
4.09_665.1323m/z	665.132	4.08782	pos	Myricetin 3,3'-digalactoside	HMDB0037850	Phenylpropanoids and polyketides	Flavonoids	Flavonoid glycosides	M+Na	C27H30O18	34.9	0	-0.200603	1.88015	1.09766e-07	2.75878e-06	-8.87334	0.00213235	305.549	143292	353.791	7.93017e-07	7.93017e-07	2560.13	141.568	7.93017e-07	7.93017e-07	7.93017e-07	7.93017e-07	7.93017e-07	117473	247869	91001.8	118901	146616	78591.3	192687	147932	148555
4.51_557.3104m/z	557.31	4.5101	pos	2-[(6E)-8-hydroxy-3,7-dimethylocta-2,6-dien-1-yl]benzene-1,3,5-triol	HMDB0133090	Lipids and lipid-like molecules	Prenol lipids	Monoterpenoids	2M+H	C16H22O4	36.7	0	-0.873067	1.032	9.19646e-12	3.60729e-09	-9.01913	0.0019274	78.9361	40954.7	238.838	7.93017e-07	7.93017e-07	7.93017e-07	259.568	7.93017e-07	184.262	7.93017e-07	23.0233	83.6686	36256	56477.8	29610.1	33835.1	38037.9	48381.4	42124.5	43355.1	40514.6
4.09_665.3329m/z	665.333	4.08782	pos	Gibberellin A51	HMDB0035041	Lipids and lipid-like molecules	Prenol lipids	Diterpenoids	2M+H	C19H24O5	35.9	0	1.28083	1.78388	2.99772e-07	5.47802e-06	-10.1555	0.000876789	114.526	130620	7.93017e-07	7.93017e-07	7.93017e-07	1145.26	7.93017e-07	7.93017e-07	7.93017e-07	7.93017e-07	7.93017e-07	7.93017e-07	105704	246528	80247.9	104556	142917	80961.1	160682	127213	126771
4.09_831.6645m/z	831.664	4.08782	pos	2-Hydroxyhexadecanoylcarnitine	LMFA07010720	Lipids and lipid-like molecules	Fatty Acyls	Fatty esters	2M+H	C23H45NO5	34.6	0	-2.81073	1.02752	3.26787e-07	5.75344e-06	-35.6659	1.83438e-11	7.93017e-07	43230.8	7.93017e-07	7.93017e-07	7.93017e-07	7.93017e-07	7.93017e-07	7.93017e-07	7.93017e-07	7.93017e-07	7.93017e-07	7.93017e-07	33894.5	75271.4	26766.6	33070.5	45036.9	23404.7	60747.8	52946.9	37937.6

## Sheet: Sa vs. A10-FMT
ID	m/z	Retention time (min)	Ion mode	Metabolites	Compound ID	Super Class	Class	Sub Class	Adducts	Formula	Score	Fragmentation Score	Mass Error (ppm)	VIP	P-value	adj.P-value	log2(FC)	FC	average(T5IMA10)	average(T5Sa)	T5IMA10-1	T5IMA10-2	T5IMA10-3	T5IMA10-4	T5IMA10-5	T5IMA10-6	T5IMA10-7	T5IMA10-8	T5IMA10-9	T5IMA10-10	T5Sa-1	T5Sa-2	T5Sa-3	T5Sa-4	T5Sa-5	T5Sa-6	T5Sa-7	T5Sa-8	T5Sa-9	T5Sa-10
1.25_380.1116m/z	380.112	1.2467	pos	S-Lactoylglutathione	HMDB0001066	Organic acids and derivatives	Carboxylic acids and derivatives	Amino acids, peptides, and analogues	M+H	C13H21N3O8S	52.4	73.4	-1.66029	1.2126	0.00833112	0.0689608	2.43172	5.39536	220744	40913.7	132736	228682	7.93017e-07	263000	280878	280456	241402	663333	618.823	116336	739.481	3422.87	28930.5	95826.8	70197	81792.5	60896.5	23102.9	10996.5	33231.8
2.16_238.1070m/z	238.107	2.15622	pos	Salsoline-1-carboxylate	HMDB0013067	Organoheterocyclic compounds	Tetrahydroisoquinolines	Unclassified	M+H	C12H15NO4	49.8	56.7	-1.74077	1.03826	0.0277006	0.127592	1.82134	3.53409	35741.1	10113.2	18738.1	42051.1	119461	30686.4	21324.9	26899.2	5948.26	3673.27	47558.3	41070.1	5935.07	24249.2	7942.66	840.251	5662.15	6652.98	7158.54	24904.5	8857.43	8929.66
1.13_337.0441m/z	337.044	1.12517	neg	Imidazoleacetic acid ribotide	HMDB0006032	Organic oxygen compounds	Organooxygen compounds	Carbohydrates and carbohydrate conjugates	M-H	C10H15N2O9P	38.7	0	-0.430916	1.49769	0.00257456	0.0427736	1.53717	2.90225	126966	43747.7	87323.2	94479.3	37918.5	119238	157933	117746	88859.3	137950	120479	307738	60755.5	65230.9	46712.9	22813.8	16473.7	21513.8	25294.1	91005.9	45839.7	41836.4
2.97_427.1390m/z	427.139	2.96708	pos	Villosin	48037	Unclassified	Unclassified	Unclassified	M+H	C23H22O8	38.2	0.206	0.595114	1.37566	0.00861402	0.0699734	1.38607	2.61366	173878	66526.7	117960	177254	1667.87	355743	273145	225691	194963	155094	39765.6	197499	49642.8	19243.7	181969	13128.8	40866	49662.4	50487.1	103460	71534.7	85273
17.46_783.5773n	806.567	17.464	pos	PC(16:0/20:3(8Z,11Z,14Z))	HMDB0007981	Unclassified	Unclassified	Unclassified	M+Na, M+K, M+H-H2O	C44H82NO8P	51.6	71.5	-0.590472	3.63823	0.0196872	0.105264	1.34493	2.54018	1.1654e+06	458789	538511	1.21996e+06	923104	2.23722e+06	634203	835169	469386	907367	729481	3.15965e+06	242747	373568	662195	579537	404091	390110	548727	569157	379041	438715
11.05_855.5967n	854.591	11.0457	neg	PS(20:3(8Z,11Z,14Z)/21:0)	LMGP03010614	Lipids and lipid-like molecules	Glycerophospholipids	Glycerophosphoserines	M-H2O-H, M-H	C47H86NO10P	40.4	13.6	-2.61642	15.355	0.00114855	0.0357706	1.20135	2.29954	1.16343e+07	5.05941e+06	1.12348e+07	7.25662e+06	1.52442e+07	1.38972e+07	1.40337e+07	7.47975e+06	1.95642e+07	8.62391e+06	1.63226e+07	2.68635e+06	7.2755e+06	3.11516e+06	7.41494e+06	2.72359e+06	4.89954e+06	3.72126e+06	6.21841e+06	3.48872e+06	5.67256e+06	6.0644e+06
0.72_192.1228m/z	192.123	0.71945	pos	2-Propylglutaric acid	HMDB0060684	Lipids and lipid-like molecules	Fatty Acyls	Fatty acids and conjugates	M+NH4	C8H14O4	40.3	9.7	-1.5189	1.19875	0.00811405	0.0680484	1.14515	2.21169	67403.6	30476.1	71104.6	117630	105631	55334.7	68147.6	93365.7	28522.4	19182.3	70038	45079.9	29206.3	81906.2	25631.2	2503.71	15708.3	23054.2	12025	52800.2	22565.1	39360.4
12.54_399.3454m/z	399.345	12.5351	pos	Diethylcarbamazine	HMDB0014849	Organoheterocyclic compounds	Diazinanes	Piperazines	2M+H	C10H21N3O	37	0	2.90781	1.06044	0.0199622	0.106257	1.05183	2.07316	62397.7	30097.8	42619.4	48486.7	110903	17878	85563.6	68989.8	31738	88734.8	87239.9	41824.1	67336.5	26506.4	7.93017e-07	12213.4	7.93017e-07	80559.8	29721.7	37858.3	22628.3	24153.9
10.21_318.2398m/z	318.24	10.2122	pos	Linoleyl hydroxamic acid	LMFA08020211	Lipids and lipid-like molecules	Fatty Acyls	Fatty amides	M+Na	C18H33NO2	38.7	0.474	-1.76638	1.89125	0.00102158	0.0350162	0.996845	1.99563	161212	80782.7	111193	134676	159501	95168.7	154272	191291	157635	182841	300004	125544	76928.8	63452.3	76392.2	67317.2	32191.3	135188	93002	125422	80017.2	57916.6
1.13_434.0872m/z	434.087	1.12517	neg	Delphinidin 3-arabinoside	HMDB0037998	Phenylpropanoids and polyketides	Flavonoids	Flavonoid glycosides	M-H	C20H19O11+	37.5	0	4.02251	1.15133	0.0122339	0.0821827	0.963909	1.95059	159890	81970.1	291333	131819	2562.72	185572	133676	138691	188710	183654	88211.2	254671	78623.3	63960	164878	65189.9	69706.3	59797.3	118179	62000.7	77239.9	60127.3
0.48_359.3149m/z	359.315	0.47635	pos	MG(0:0/i-18:0/0:0)	HMDB0072877	Lipids and lipid-like molecules	Glycerolipids	Monoradylglycerols	M+H	C21H42O4	38.6	0	-2.04061	2.27077	0.0264932	0.124917	0.885776	1.84776	295155	159737	337881	313318	406684	34147.8	362933	140096	188605	306579	521092	340213	297477	277341	240.966	10288	38922.8	155980	167404	190657	210975	248082
0.18_357.2992m/z	357.299	0.1769	pos	MG(18:1(11Z)/0:0/0:0)	HMDB0011566	Lipids and lipid-like molecules	Glycerolipids	Monoradylglycerols	M+H	C21H40O4	37.3	0	-1.99245	1.29995	0.0251388	0.121234	0.879994	1.84037	93703.5	50915.7	108857	101795	125593	10728.4	116229	49345.8	59518.3	90354.2	162301	112314	96721.1	92662.5	7.93017e-07	411.899	17677.9	55928.8	55222.7	58181.9	60306.1	72043.6
0.02_341.3043m/z	341.304	0.0194333	pos	1-O-(2R-methoxy-4Z-heptadecenyl)-sn-glycerol	LMGL01020048	Lipids and lipid-like molecules	Glycerolipids	Monoradylglycerols	M+H-H2O	C21H42O4	36.9	0	-2.11143	1.02307	0.0415157	0.160994	0.854498	1.80813	61951.2	34262.6	74026.8	66282.8	85257.2	2067.63	76316.6	28449.3	37449.9	63593.2	113228	72840.1	65566	59400.2	7.93017e-07	7.93017e-07	6890.08	31052	36211.2	42812	46262.1	54432.3
17.45_908.5372n	909.544	17.45	pos	PI(18:1(9Z)/22:6(4Z,7Z,10Z,13Z,16Z,19Z))	LMGP06010013	Lipids and lipid-like molecules	Glycerophospholipids	Glycerophosphoinositols	M+H, M+Na, M+NH4	C49H81O13P	43.6	30.2	-4.70679	5.66698	0.0264233	0.12478	0.832329	1.78056	2.23806e+06	1.25694e+06	1.89011e+06	1.93039e+06	2.77515e+06	167084	2.28862e+06	2.00558e+06	1.85582e+06	3.77888e+06	3.91053e+06	1.7784e+06	1.90767e+06	1.59422e+06	141107	203429	487644	1.97422e+06	1.35975e+06	1.66004e+06	1.6434e+06	1.59793e+06
12.39_719.5689m/z	719.569	12.3926	pos	PE(16:1(9Z)/P-18:0)	HMDB0008983	Lipids and lipid-like molecules	Glycerophospholipids	Glycerophosphoethanolamines	M+NH4	C39H76NO7P	46.2	62.8	-1.27433	6.66397	0.00140772	0.0370597	0.817271	1.76207	5.44604e+06	3.09071e+06	4.70399e+06	4.43775e+06	5.68516e+06	6.33803e+06	3.82722e+06	6.00305e+06	4.14199e+06	7.04118e+06	3.16404e+06	9.118e+06	3.18277e+06	3.12794e+06	3.13373e+06	2.92174e+06	2.85679e+06	3.55981e+06	4.46127e+06	1.80954e+06	1.70458e+06	4.14889e+06
5.15_238.1071m/z	238.107	5.14902	pos	N-lactoyl-phenylalanine	263655	Organic acids and derivatives	Carboxylic acids and derivatives	Amino acids, peptides, and analogues	M+H	C12H15NO4	58.5	96.3	-1.27828	1.204	0.000350184	0.0303115	0.809251	1.7523	83273.8	47522.5	59604.1	74041.4	112353	110528	82539.7	98482.5	80538	48361.4	63309.1	102981	56458.2	48979.8	62052.3	42988.5	40035.8	36345.6	51053	70397.8	28291.5	38623
17.49_886.5553n	887.563	17.4922	pos	PI(18:1(9Z)/20:3(8Z,11Z,14Z))	LMGP06010303	Lipids and lipid-like molecules	Glycerophospholipids	Glycerophosphoinositols	M+H, M+NH4	C47H83O13P	36.1	0	-2.03263	4.15856	0.0349475	0.145541	0.779561	1.71661	1.12676e+06	656385	1.05186e+06	974105	1.27584e+06	36105.4	1.26207e+06	918251	1.07378e+06	1.65231e+06	1.8483e+06	1.17495e+06	1.00364e+06	678522	8704.16	60556.6	166551	1.28409e+06	828993	1.03607e+06	783468	713254
0.02_330.2763n	331.284	0.0194333	pos	MG(0:0/16:0/0:0)	HMDB0011533	Lipids and lipid-like molecules	Glycerolipids	Monoradylglycerols	M+H-H2O, M+H	C19H38O4	38.5	0	-2.1308	2.26036	0.023764	0.117378	0.74428	1.67514	331279	197763	355842	342400	433788	75466.3	392084	195930	239963	359277	540552	377493	324700	312049	16391.6	36154.9	92573	247613	220434	234516	224646	268548
17.49_627.5340m/z	627.534	17.4922	pos	DG(18:0/20:4(5Z,8Z,11Z,14Z)/0:0)	HMDB0007170	Lipids and lipid-like molecules	Glycerolipids	Diradylglycerols	M+H-H2O	C41H72O5	55.9	92.5	-1.00312	3.9337	0.0383444	0.153608	0.710841	1.63676	1.1219e+06	685442	1.08258e+06	940278	1.31775e+06	81186.8	1.28504e+06	917412	1.08782e+06	1.60871e+06	1.7218e+06	1.17646e+06	981353	702371	48339.3	133869	213938	1.34011e+06	881016	1.00911e+06	786450	757865
1.12_268.1034m/z	268.103	1.12177	pos	Adenosine	86	Nucleosides, nucleotides, and analogues	Purine nucleosides	Unclassified	M+H	C10H13N5O4	54.3	79.6	-2.27101	2.72907	0.0111051	0.0786267	0.681194	1.60347	740380	461737	1.23628e+06	925548	318969	642376	760849	536136	765178	457865	1.09551e+06	665089	649272	360600	493518	323533	622084	335893	439411	338253	626108	428701
1.64_304.2478m/z	304.248	1.637	pos	10-hydroxy-16-oxo-hexadecanoic acid	LMFA01170060	Lipids and lipid-like molecules	Fatty Acyls	Fatty Acids and Conjugates	M+NH4	C16H30O4	39.1	0	-1.56351	1.13235	0.00920692	0.072163	0.64256	1.5611	83359.9	53398.3	85318.4	86115	94542.9	52654.9	94519.2	48659.4	57729.4	80846.4	147341	85872.5	82437.5	65203.7	39294.9	39535.9	39325.2	77481.3	51543	48978	42520.9	47662.5
7.73_257.1467m/z	257.147	7.73312	pos	5-Aminopentanoic acid	HMDB0003355	Organic acids and derivatives	Carboxylic acids and derivatives	Amino acids, peptides, and analogues	2M+Na	C5H11NO2	42.4	17.5	-1.83639	1.34928	0.0175947	0.0992285	0.606656	1.52273	140638	92359.2	116905	128319	169866	62565.2	165842	114310	107077	158659	227243	155592	123485	128801	38172.4	48344.5	59642.9	135617	112842	103652	56369.5	116665
12.48_812.6748n	813.682	12.478	pos	SM(d18:2/24:0)	LMSP03010081	Lipids and lipid-like molecules	Sphingolipids	Phosphosphingolipids	M+H, M+Na	C47H93N2O6P	38.3	3.35	-2.91294	12.8296	0.0262737	0.124523	0.58549	1.50055	2.46921e+07	1.64554e+07	1.96959e+07	2.09983e+07	3.41367e+07	2.49631e+07	2.95575e+07	1.63609e+07	2.05683e+07	2.90649e+07	2.28952e+07	2.86798e+07	2.44615e+07	1.27335e+07	65495.5	2.27617e+07	8.78803e+06	3.18772e+07	1.95324e+07	2.12341e+07	1.04987e+07	1.26009e+07
0.72_162.1122m/z	162.112	0.71945	pos	L-Carnitine	34532	Organic nitrogen compounds	Organonitrogen compounds	Quaternary ammonium salts	M+H	C7H15NO3	57	88.5	-1.48795	3.47554	0.0491014	0.177214	0.563909	1.47827	2.87681e+06	1.94607e+06	2.8309e+06	3.17388e+06	1.03806e+06	2.29192e+06	2.55258e+06	3.31323e+06	2.16775e+06	3.74104e+06	1.83102e+06	5.82777e+06	1.41828e+06	2.00847e+06	2.48895e+06	1.11206e+06	1.69412e+06	2.29884e+06	1.95951e+06	1.97694e+06	1.66013e+06	2.84341e+06
0.72_237.1805m/z	237.18	0.71945	pos	Trimethylammonioacetate	HMDB0059606	Organic acids and derivatives	Carboxylic acids and derivatives	Amino acids, peptides, and analogues	2M+H	C5H12NO2+	51.7	63.4	-1.80607	2.40834	0.0390328	0.155147	0.548839	1.46291	610941	417621	719403	771949	150336	589241	745075	790507	560254	404084	932909	445656	435802	602825	303108	206492	271256	450482	398882	710799	404248	392319
3.62_208.1308n	209.138	3.62222	pos	5S,6S-epoxy-15R-hydroxy-ETE	HMDB0062236	Organic oxygen compounds	Organooxygen compounds	Ethers	M+H, M+K, M+Na, M+NH4	C9H20O5	45.9	33.1	-1.14313	1.63298	0.0159028	0.0940947	0.545523	1.45955	234139	160419	231612	195898	212463	250850	175659	111425	263266	311258	404100	184860	215522	181182	155492	131552	115681	139321	197198	179797	168985	119458
0.72_120.1020m/z	120.102	0.71945	pos	Isovaleric acid	HMDB0000718	Lipids and lipid-like molecules	Fatty Acyls	Fatty acids and conjugates	M+NH4	C5H10O2	50.9	57.1	0.783854	2.70674	0.020034	0.106502	0.536948	1.4509	782490	539314	940545	984406	307296	724542	907637	1.03015e+06	598580	498343	1.07906e+06	754341	541055	725404	391270	317525	392329	564265	514078	874803	513092	559316
4.01_298.2221m/z	298.222	4.01122	pos	Palmitic acid(d3)	LMFA01010046	Lipids and lipid-like molecules	Fatty Acyls	Fatty Acids and Conjugates	M+K	C16H29D3O2	39.1	0.242	-0.598354	1.47251	0.0127329	0.0838323	0.535855	1.4498	202418	139618	204398	149723	161689	169317	130170	255484	179728	236779	349895	186994	180845	122795	195347	139307	84292.2	150870	122889	139983	144059	115789
2.34_332.2790m/z	332.279	2.33508	pos	12,13-DHOME	HMDB0004705	Lipids and lipid-like molecules	Fatty Acyls	Fatty acids and conjugates	M+NH4	C18H34O4	38.4	0	-1.85804	1.93937	0.0112765	0.0792368	0.524106	1.43804	293993	204439	298994	290080	355743	210436	293095	163927	212881	323180	483014	308577	268072	231193	176008	176162	142205	292036	210025	189941	174257	184497
0.16_271.2626m/z	271.263	0.162783	pos	Nonyl octanoate	HMDB0034131	Lipids and lipid-like molecules	Fatty Acyls	Fatty alcohol esters	M+H	C17H34O2	38.4	0	-1.97425	1.26648	0.00150603	0.0380572	0.523716	1.43765	131341	91357.7	109110	109322	149120	106143	159344	89115.3	135634	154628	173461	127529	112120	86951.5	72249.6	75755.3	61669.8	124163	84080.3	110324	95915.3	90348.3
4.49_312.2376m/z	312.238	4.49447	pos	Margaric acid(d3)	LMFA01010048	Lipids and lipid-like molecules	Fatty Acyls	Fatty Acids and Conjugates	M+K	C17H31D3O2	39	0.335	-0.985101	1.6179	0.00896286	0.0712673	0.517609	1.43158	271888	189921	248368	218226	190538	290452	191530	348009	269059	338840	422329	201526	239072	163325	252042	181156	110889	189596	194727	204150	214550	149706
1.91_332.2789m/z	332.279	1.90965	pos	12,13-DiHOME	LMFA02000230	Lipids and lipid-like molecules	Fatty Acyls	Octadecanoids	M+NH4	C18H34O4	38.4	0	-1.94668	1.67947	0.0168217	0.0968209	0.51739	1.43136	230220	160839	206057	219675	272020	189395	228862	126597	153932	254994	404022	246643	189326	172483	166337	147810	124218	240330	159160	140190	134203	134339
0.03_256.2398n	257.247	0.03375	pos	Palmitic acid	LMFA01010001	Lipids and lipid-like molecules	Fatty Acyls	Fatty Acids and Conjugates	M+H-H2O, M+H	C16H32O2	38.5	0	-1.77927	1.65714	0.0105047	0.0764441	0.504233	1.41837	240355	169459	215438	245978	279834	149093	274001	178322	193783	274568	343277	249259	213042	211277	91003.4	97579.1	125400	261597	182015	173660	155954	183061
0.75_134.1173m/z	134.117	0.747167	pos	Propanal	HMDB0003366	Organic oxygen compounds	Organooxygen compounds	Carbonyl compounds	2M+NH4	C3H6O	38.9	0	-1.84602	4.94639	0.00613565	0.0596718	0.502174	1.41635	2.26465e+06	1.59894e+06	2.69626e+06	2.65476e+06	1.49867e+06	2.09628e+06	2.45712e+06	2.79185e+06	1.72922e+06	1.64321e+06	2.91337e+06	2.16573e+06	1.47737e+06	2.15287e+06	1.29675e+06	943178	1.11649e+06	1.7446e+06	1.6907e+06	2.39997e+06	1.47827e+06	1.68917e+06
0.02_198.1617n	199.169	0.0194333	pos	2-Octenyl butyrate	92846	Lipids and lipid-like molecules	Fatty Acyls	Fatty alcohol esters	M+H-H2O, M+H, M+Na	C12H22O2	50.8	58.9	-1.56068	3.77512	0.00472154	0.053709	0.501908	1.41609	1.19025e+06	840518	1.1159e+06	1.2102e+06	1.3528e+06	853902	1.25491e+06	808108	942291	1.3783e+06	1.73541e+06	1.25065e+06	1.06248e+06	960542	599245	635194	628849	1.22727e+06	840789	869961	756892	823959
10.86_805.5838n	804.577	10.8605	neg	PS(15:0/22:0)	HMDB0112334	Lipids and lipid-like molecules	Glycerophospholipids	Glycerophosphoserines	M-H, M+FA-H	C43H84NO10P	40.8	7.82	0.640179	12.3083	0.0445683	0.167893	0.490604	1.40503	1.99407e+07	1.41923e+07	2.32508e+07	1.27637e+07	2.63074e+07	1.74643e+07	2.45991e+07	1.94542e+07	2.10488e+07	1.52096e+07	3.3367e+07	5.94178e+06	1.68502e+07	9.18181e+06	1.67379e+07	1.1248e+07	1.65072e+07	1.04557e+07	1.21697e+07	1.4841e+07	1.37748e+07	2.01569e+07
8.25_140.0680m/z	140.068	8.24643	pos	5-amino-pentanoic acid	LMFA01100040	Lipids and lipid-like molecules	Fatty Acyls	Fatty Acids and Conjugates	M+Na	C5H11NO2	40.5	8.65	-1.33791	1.83459	0.0138531	0.087634	0.462255	1.37769	296452	215180	270129	284644	357343	168736	323136	231809	254889	348677	413761	311391	259401	253943	132121	130021	152631	320497	261178	231585	187927	222491
9.17_140.0680m/z	140.068	9.17245	pos	Norvaline	HMDB0013716	Organic acids and derivatives	Carboxylic acids and derivatives	Amino acids, peptides, and analogues	M+Na	C5H11NO2	40.1	5.6	-1.43901	1.16029	0.00863874	0.0699734	0.447507	1.36368	139348	102185	122449	131122	158454	102358	143845	115393	115333	172420	197934	134171	102295	107406	79284.6	86196	69764.3	161145	115878	114809	74615.1	110458
0.64_216.1722n	239.161	0.636133	pos	xi-5-Hydroxydodecanoic acid	HMDB0040169	Lipids and lipid-like molecules	Fatty Acyls	Fatty acids and conjugates	M+Na, M+K	C12H24O3	38.5	0	-1.48696	1.07607	0.00839766	0.0692498	0.432894	1.34994	84086.9	62289.4	65650.5	91790.8	123073	71240.5	79419.3	61005	72130.4	84311.1	111479	80769.2	57525.5	79064.7	56215.4	43989.2	48815.3	74997.4	66462.1	76254.1	66721.6	52849.2
1.72_145.0494m/z	145.049	1.72325	pos	3-hexenedioic acid	44713	Lipids and lipid-like molecules	Fatty Acyls	Fatty acids and conjugates	M+H	C6H8O4	48.5	46.6	-1.04656	1.36207	0.0252977	0.121696	0.424485	1.34209	234853	174990	270907	255631	193743	162279	288972	265281	183189	229888	230882	267757	209140	207449	95983.5	91551.1	113753	114255	236150	272389	208103	201126
8.94_140.0680m/z	140.068	8.9351	pos	4R-aminopentanoic acid	LMFA01100021	Lipids and lipid-like molecules	Fatty Acyls	Fatty Acids and Conjugates	M+Na	C5H11NO2	40.2	5.93	-1.32887	2.25482	0.0161228	0.094732	0.399083	1.31867	570066	432304	482855	525989	650665	395116	627149	491773	492870	682909	764724	586609	473475	479951	302998	307780	321707	684515	503936	464693	328839	455140
1.12_124.0586m/z	124.059	1.12177	pos	4-Ethyl-2,5-dimethylthiazole	HMDB0040069	Organoheterocyclic compounds	Azoles	Thiazoles	M+H-H2O	C7H11NS	36.5	0	4.53298	1.66596	0.00657536	0.061186	0.396681	1.31648	451108	342663	433858	375322	292936	370620	651830	444356	482283	533614	479053	447208	343197	389837	339391	258201	319472	337987	326691	456013	294236	361607
0.58_214.1566n	215.164	0.579583	pos	4-Acetoxy-2-hexyltetrahydrofuran	HMDB0037398	Organoheterocyclic compounds	Tetrahydrofurans	Unclassified	M+H-H2O, M+H	C12H22O3	38.4	0	-1.26789	1.14943	0.0239405	0.117914	0.393125	1.31324	168896	128611	140742	169623	186892	117339	185214	135911	148104	208950	224076	172112	149680	155696	79487.3	83732.3	102310	213301	131930	124333	112019	133621
1.12_123.0553m/z	123.055	1.12177	pos	Niacinamide	1497	Organoheterocyclic compounds	Pyridines and derivatives	Pyridinecarboxylic acids and derivatives	M+H	C6H6N2O	50.5	58.6	0.0437336	6.17549	0.00760071	0.0657086	0.386865	1.30755	6.56893e+06	5.02385e+06	6.4269e+06	5.658e+06	4.09252e+06	5.49808e+06	9.43303e+06	6.35188e+06	6.90859e+06	7.79404e+06	6.85007e+06	6.67625e+06	5.15512e+06	5.831e+06	4.76547e+06	3.77674e+06	4.60815e+06	5.0499e+06	4.82151e+06	6.65883e+06	4.33094e+06	5.24088e+06
14.92_124.0870m/z	124.087	14.9236	pos	L-Histidinol	HMDB0003431	Organic nitrogen compounds	Organonitrogen compounds	Amines	M+H-H2O	C6H11N3O	38.7	0	0.241688	3.52793	0.0108504	0.0779038	0.369239	1.29167	1.15056e+06	890755	875544	1.29167e+06	1.3562e+06	847513	1.20597e+06	1.12856e+06	1.08041e+06	1.41502e+06	1.49418e+06	810553	1.03767e+06	949021	983762	716444	553432	1.00859e+06	1.01571e+06	929199	862998	850727
1.36_133.1050m/z	133.105	1.35742	pos	2-Heptanethiol	HMDB0032303	Organosulfur compounds	Thiols	Alkylthiols	M+H	C7H16S	38	0	3.56258	3.56082	0.00132967	0.0367763	0.368684	1.29117	1.28349e+06	994052	1.12395e+06	1.13871e+06	1.45593e+06	1.38037e+06	1.34289e+06	1.44479e+06	1.24417e+06	1.04787e+06	1.15143e+06	1.50484e+06	945943	999189	1.22742e+06	869195	967205	784142	1.13693e+06	1.31164e+06	799362	899504
1.36_132.1019m/z	132.102	1.35742	pos	L-Isoleucine	23	Organic acids and derivatives	Carboxylic acids and derivatives	Amino acids, peptides, and analogues	M+H	C6H13NO2	53	72.4	-0.366808	12.9893	0.00151788	0.0380572	0.362023	1.28523	1.73228e+07	1.34784e+07	1.50745e+07	1.5336e+07	1.95626e+07	1.86009e+07	1.82859e+07	1.94947e+07	1.67414e+07	1.40832e+07	1.5705e+07	2.03435e+07	1.27175e+07	1.36108e+07	1.65774e+07	1.17579e+07	1.31576e+07	1.07318e+07	1.55912e+07	1.76468e+07	1.07874e+07	1.22052e+07
1.12_118.0419n	136.076	1.12177	pos	2,4,6-Octatriyn-1-ol	HMDB0030968	Lipids and lipid-like molecules	Fatty Acyls	Fatty alcohols	M+H, M+NH4	C8H6O	41.4	10.2	0.701317	1.60966	0.0338866	0.142854	0.358672	1.28225	414764	323467	326973	253224	605731	562660	414762	413419	383138	356167	408801	422767	232481	299511	446388	336297	328697	392483	279319	402636	257130	259730
1.12_164.0471n	182.081	1.12177	pos	2-Hydroxycinnamic acid	306	Phenylpropanoids and polyketides	Cinnamic acids and derivatives	Hydroxycinnamic acids and derivatives	M+H, M+NH4, M+H-H2O	C9H8O3	51.5	62.7	-1.74743	6.43255	0.00554182	0.058066	0.355679	1.27959	5.44374e+06	4.25429e+06	4.35081e+06	3.99034e+06	7.29138e+06	6.67345e+06	5.24605e+06	5.40582e+06	5.20619e+06	4.85724e+06	5.65247e+06	5.76362e+06	3.38089e+06	4.10665e+06	5.28568e+06	4.36126e+06	3.99192e+06	4.86538e+06	4.03417e+06	5.17836e+06	3.41796e+06	3.92061e+06
0.28_126.1047n	109.101	0.27625	pos	2,5-Octadien-1-ol	HMDB0040146	Lipids and lipid-like molecules	Fatty Acyls	Fatty alcohols	M+H-H2O, M+H	C8H14O	45.1	28.7	1.59164	1.27834	0.0255192	0.122354	0.337605	1.26366	229638	181725	191576	220317	254763	180595	251618	195399	204938	269108	302365	225699	207041	196010	133596	135625	148976	300456	183998	178563	156264	176719
1.12_132.0244n	150.058	1.12177	pos	3-Methyl sulfolene	HMDB0059667	Organoheterocyclic compounds	Dihydrothiophenes	Unclassified	M+H, M+NH4	C5H8O2S	38.4	1.93	-0.872526	3.83289	0.000697094	0.0343983	0.332249	1.25897	2.4062e+06	1.91123e+06	2.18045e+06	1.76058e+06	2.44547e+06	2.46856e+06	2.73927e+06	2.50046e+06	2.35907e+06	2.61251e+06	2.2449e+06	2.75069e+06	1.63534e+06	1.84641e+06	2.22233e+06	1.8033e+06	1.95182e+06	2.22028e+06	1.76017e+06	2.27279e+06	1.6261e+06	1.77382e+06
0.36_122.0734n	123.079	0.361933	pos	2,6-Dimethylphenol	HMDB0032150	Benzenoids	Benzene and substituted derivatives	Phenols and derivatives	M+H-H2O, M+H	C8H10O	37.9	0	1.98842	2.84439	0.0399791	0.157433	0.323786	1.25161	1.06402e+06	850120	1.01813e+06	1.07017e+06	1.2593e+06	733561	1.06383e+06	855051	842235	1.07126e+06	1.65141e+06	1.07524e+06	974164	888531	647039	707763	789840	1.24341e+06	882065	786414	747528	834446
9.79_528.3100m/z	528.31	9.78973	neg	PE(22:4(7Z,10Z,13Z,16Z)/0:0)	LMGP02050014	Lipids and lipid-like molecules	Glycerophospholipids	Glycerophosphoethanolamines	M-H	C27H48NO7P	38	0	0.747946	1.15957	0.0481556	0.175113	0.321886	1.24996	297345	237883	243938	228933	293224	259904	342402	228027	242260	383836	478099	272830	292332	207969	238788	244933	283375	278257	204545	204971	217398	206263
0.71_104.1073m/z	104.107	0.705617	pos	Choline	56	Organic nitrogen compounds	Organonitrogen compounds	Quaternary ammonium salts	M+H	C5H13NO	51	63.9	2.86943	5.51546	0.0229633	0.114863	0.313866	1.24303	3.81618e+06	3.07005e+06	2.96782e+06	3.11409e+06	5.24306e+06	3.49465e+06	3.56045e+06	3.14841e+06	2.94534e+06	3.74057e+06	5.27934e+06	4.66808e+06	3.57226e+06	2.88189e+06	2.94975e+06	3.18683e+06	2.86894e+06	3.07862e+06	3.36568e+06	3.16047e+06	2.9483e+06	2.68779e+06
1.22_114.0552m/z	114.055	1.219	pos	4-Hydroxy-2-pyrrolidinecarboxylic acid	HMDB0036576	Organic acids and derivatives	Carboxylic acids and derivatives	Amino acids, peptides, and analogues	M+H-H2O	C5H9NO3	31.1	0	1.66434	1.20473	0.00231094	0.0418665	0.305492	1.23584	211993	171537	200737	189483	195479	189413	221123	188411	204446	248759	261011	221068	198729	175019	138013	150686	145359	208730	186393	197242	149863	165340
0.59_158.0577n	159.065	0.594483	pos	Succinylacetone	4154	Organic acids and derivatives	Keto acids and derivatives	Medium-chain keto acids and derivatives	M+H-H2O, M+H	C7H10O4	41.6	11	-1.42024	2.35357	0.0201161	0.106716	0.300278	1.23138	1.00917e+06	819545	876075	762152	1.08834e+06	1.01441e+06	979044	783508	988928	1.28768e+06	1.32472e+06	986868	840301	700056	779962	785383	594852	1.13374e+06	781481	939580	834764	805335
0.64_218.0787n	257.042	0.636133	pos	Triacetin	HMDB0029592	Lipids and lipid-like molecules	Glycerolipids	Triradylcglycerols	M+Na, M+K	C9H14O6	43.4	22.3	-1.45335	1.46124	0.01529	0.0925833	0.293714	1.22579	305490	249218	264357	218922	358381	336582	281538	261166	330831	316737	402869	283517	234903	210623	309091	276777	197868	266900	231610	292680	266806	204927
2.09_167.0892m/z	167.089	2.08503	pos	3-(4-Methyl-3-pentenyl)thiophene	92919	Organoheterocyclic compounds	Heteroaromatic compounds	Unclassified	M+H	C10H14S	36.7	0.676	1.91814	3.3479	0.00682305	0.0622387	0.286732	1.21987	1.73538e+06	1.42259e+06	1.76952e+06	1.67919e+06	1.5684e+06	1.84716e+06	1.88007e+06	1.93212e+06	1.63154e+06	1.39575e+06	1.52753e+06	2.1225e+06	1.59815e+06	1.39387e+06	1.66425e+06	1.38437e+06	1.34934e+06	1.05581e+06	1.57987e+06	1.81753e+06	1.16811e+06	1.21455e+06
2.07_148.0523n	166.086	2.071	pos	trans-Cinnamic acid	63104	Phenylpropanoids and polyketides	Cinnamic acids and derivatives	Cinnamic acids	M+H, M+NH4, M+H-H2O	C9H8O2	45.5	37.7	-0.850554	10.6286	0.00770798	0.0663055	0.285199	1.21858	1.77163e+07	1.45385e+07	1.79383e+07	1.72639e+07	1.61089e+07	1.89457e+07	1.92034e+07	1.96831e+07	1.65927e+07	1.41096e+07	1.56493e+07	2.16683e+07	1.62892e+07	1.41896e+07	1.71042e+07	1.42574e+07	1.39094e+07	1.06029e+07	1.61083e+07	1.86229e+07	1.18336e+07	1.24678e+07
16.79_102.1280m/z	102.128	16.7891	pos	2E-Hexene	LMFA11000035	Lipids and lipid-like molecules	Fatty Acyls	Hydrocarbons	M+NH4	C6H12	43.6	22.4	3.25874	1.01589	0.0393402	0.155976	0.275461	1.21038	196399	162262	147309	192858	200093	158080	197479	195240	192885	262727	238113	179202	158294	181445	126414	119815	123667	233312	188833	172889	154581	163369
12.84_228.1954m/z	228.195	12.8369	pos	9-tridecynoic acid	LMFA01030602	Lipids and lipid-like molecules	Fatty Acyls	Fatty Acids and Conjugates	M+NH4	C13H22O2	51	62.2	-1.79195	1.45006	0.015517	0.0930337	0.275084	1.21006	292372	241617	246921	287292	320214	223556	292245	302441	283692	342934	383951	240477	241366	240170	267369	219745	186461	316789	247045	248739	208202	240284
17.46_117.0788n	140.068	17.464	pos	4S-aminopentanoic acid	LMFA01100022	Lipids and lipid-like molecules	Fatty Acyls	Fatty Acids and Conjugates	M+Na, M+K	C5H11NO2	39.4	1.27	-1.53683	1.39629	0.0348458	0.145471	0.260928	1.19825	349117	291356	301867	313394	397829	276446	356347	317291	307180	411108	482437	327266	307655	316547	253229	232762	237942	400528	287195	284367	275712	317619
1.13_333.0938m/z	333.094	1.12517	neg	(S)-a-Amino-2,5-dihydro-5-oxo-4-isoxazolepropanoic acid N2-glucoside	HMDB0029404	Organic oxygen compounds	Organooxygen compounds	Carbohydrates and carbohydrate conjugates	M-H	C12H18N2O9	54.1	73.5	-0.475762	2.50851	0.0330773	0.141253	0.258148	1.19594	1.43544e+06	1.20026e+06	1.47313e+06	1.40444e+06	861714	1.59141e+06	1.29064e+06	1.73409e+06	1.45816e+06	1.51265e+06	1.44029e+06	1.58794e+06	1.25644e+06	1.10327e+06	1.37747e+06	1.13747e+06	774419	1.46758e+06	1.38057e+06	1.41377e+06	1.12355e+06	968092
17.42_139.0613m/z	139.061	17.4218	pos	8-Hydroxypurine	HMDB0012182	Organoheterocyclic compounds	Imidazopyrimidines	Purines and purine derivatives	M+H	C5H6N4O	39	0	-1.26358	1.13015	0.0307252	0.134725	0.248259	1.18777	241038	202933	205236	212313	250553	220239	244839	223689	229665	283839	305570	234442	201466	195560	192421	173605	164690	309369	212644	208365	177917	193294
9.19_555.0079m/z	555.008	9.19082	neg	Gossypetin 8-glucuronide 3-sulfate	HMDB0037752	Phenylpropanoids and polyketides	Flavonoids	Flavonoid glycosides	M-H2O-H	C21H18O17S	35.4	0	-1.30474	1.05729	0.00335786	0.0475575	0.24097	1.18179	171161	144833	148154	165476	184517	137548	173108	157616	180178	185044	217876	162095	149867	142752	144767	143757	134859	170012	144505	140510	141415	135882
0.76_243.0619m/z	243.062	0.7611	neg	Uridine	90	Nucleosides, nucleotides, and analogues	Pyrimidine nucleosides	Unclassified	M-H	C9H12N2O6	55.8	84.4	-1.66936	1.15951	0.0459442	0.17054	0.228328	1.17148	295202	251992	356063	314642	210797	263682	330714	285392	298352	335005	326060	231315	273372	254114	258130	212292	208337	251529	308739	326336	194990	232075
3.48_118.0652m/z	118.065	3.47578	pos	Indole	286	Organoheterocyclic compounds	Indoles and derivatives	Indoles	M+H	C8H7N	53	69.7	0.948844	1.41896	0.00566752	0.0581479	0.195147	1.14484	287729	251327	266937	330553	295888	267413	296327	278184	280644	243394	319974	297975	290612	267833	229496	231500	239120	268044	278261	258271	244581	205547
3.48_155.0449m/z	155.045	3.47578	pos	L-alpha-Amino-5-oxo-2(5H)-isoxazolepropanoic acid	HMDB0034322	Organic acids and derivatives	Carboxylic acids and derivatives	Amino acids, peptides, and analogues	M+H-H2O	C6H8N2O4	38.1	0	-1.43795	2.06977	0.011242	0.0790921	0.19339	1.14345	662186	579113	599894	784356	702333	582207	686910	634221	661503	573767	723804	672861	647650	638498	523525	526748	544636	690120	606052	576268	553237	484397
17.43_118.0145m/z	118.014	17.4336	neg	Aminomalonic acid	HMDB0001147	Organic acids and derivatives	Carboxylic acids and derivatives	Amino acids, peptides, and analogues	M-H	C3H5NO4	39.5	0	-1.02254	2.25627	0.00307595	0.0461282	0.189315	1.14022	953863	836559	860161	962924	1.05042e+06	797757	951914	894051	1.05065e+06	975326	1.0985e+06	896921	798226	873503	792136	836262	776638	942502	811228	891769	854860	788464
13.63_118.0144m/z	118.014	13.6303	neg	Bovinocidin	HMDB0034259	Organic 1,3-dipolar compounds	Allyl-type 1,3-dipolar organic compounds	Organic nitro compounds	M-H	C3H5NO4	39.5	0	-1.12856	2.07663	0.011921	0.0811039	0.138578	1.10082	1.42702e+06	1.29633e+06	1.333e+06	1.40979e+06	1.53602e+06	1.20853e+06	1.4394e+06	1.34889e+06	1.54176e+06	1.42956e+06	1.64698e+06	1.3763e+06	1.23373e+06	1.346e+06	1.20127e+06	1.35415e+06	1.23183e+06	1.47063e+06	1.23702e+06	1.30867e+06	1.30322e+06	1.27675e+06
9.62_361.2731m/z	361.273	9.61683	pos	9-deoxy-9-methylene-16,16-dimethyl -PGE2	LMFA03010059	Lipids and lipid-like molecules	Fatty Acyls	Eicosanoids	M+H-H2O	C23H38O4	50.8	63.1	-1.72858	2.39099	0.0024462	0.0421478	-0.395841	0.760046	290553	382284	260740	280744	223877	366801	334379	284651	275827	334629	249351	294535	301489	359048	261431	425156	455221	441547	351654	344235	407606	475452
12.82_858.5963m/z	858.596	12.8225	pos	PC(20:1(11Z)/20:4(5Z,8Z,11Z,14Z))	HMDB0008312	Lipids and lipid-like molecules	Glycerophospholipids	Glycerophosphocholines	M+Na	C48H86NO8P	54.9	90.5	-2.41068	3.3603	0.0136934	0.0873379	-0.408093	0.753619	1.06976e+06	1.4195e+06	931416	780629	830388	936795	1.13453e+06	1.38131e+06	1.05049e+06	1.41511e+06	1.5187e+06	718262	1.26779e+06	1.62012e+06	1.09281e+06	1.41235e+06	1.2983e+06	2.04973e+06	1.12489e+06	1.3892e+06	1.27406e+06	1.66576e+06
10.12_608.3187m/z	608.319	10.1199	neg	PHHdiA-PE	LMGP20020017	Lipids and lipid-like molecules	Glycerophospholipids	Oxidized glycerophospholipids	M-H	C28H52NO11P	43.8	28.3	-3.03893	1.65	0.0320483	0.138495	-0.409835	0.752709	201584	267811	289206	184647	339807	215048	207306	139063	176912	223941	92763.5	147146	228478	255745	267483	355268	315624	209519	222172	198328	316093	309401
0.79_259.0223m/z	259.022	0.78905	neg	Glucose 1-phosphate	HMDB0001586	Organic oxygen compounds	Organooxygen compounds	Carbohydrates and carbohydrate conjugates	M-H	C6H13O9P	53.1	68.1	-0.595829	3.94983	0.0348669	0.145491	-0.428079	0.743251	1.10775e+06	1.49042e+06	1.0903e+06	1.17384e+06	51984	1.22696e+06	1.3553e+06	1.51585e+06	1.47395e+06	1.35998e+06	407431	1.42194e+06	1.53709e+06	1.1365e+06	1.60893e+06	1.83805e+06	1.64915e+06	1.60932e+06	1.44498e+06	1.48166e+06	1.24745e+06	1.35103e+06
0.79_289.0327m/z	289.033	0.78905	neg	Fucose 1-phosphate	HMDB0001265	Organic oxygen compounds	Organooxygen compounds	Carbohydrates and carbohydrate conjugates	M+FA-H	C6H13O8P	46.6	40.2	-1.33746	1.4353	0.0264129	0.124776	-0.53332	0.690963	99983.8	144702	98940.7	104179	6954.9	112491	115103	148314	134051	109555	17006.6	153242	163003	85264.3	142743	196913	173768	148837	122051	128565	152076	133803
10.18_479.3012n	478.294	10.1801	neg	LysoPE(18:1(11Z)/0:0)	HMDB0011505	Lipids and lipid-like molecules	Glycerophospholipids	Glycerophosphoethanolamines	M-H, 2M-H	C23H46NO7P	51.5	60.4	0.104854	7.18292	0.00124873	0.0361887	-0.574858	0.671352	1.85404e+06	2.76164e+06	2.38876e+06	2.0975e+06	1.33102e+06	2.09338e+06	2.08896e+06	1.41377e+06	1.681e+06	1.83643e+06	2.05495e+06	1.55459e+06	2.63926e+06	2.29219e+06	2.3822e+06	3.49971e+06	3.6798e+06	2.6763e+06	1.98532e+06	1.86698e+06	2.95197e+06	3.64271e+06
1.15_283.0915n	282.084	1.15305	neg	Guanosine	87	Nucleosides, nucleotides, and analogues	Purine nucleosides	Unclassified	M-H, 2M-H, M+FA-H	C10H13N5O5	55.5	82.7	-0.473741	1.6276	0.0115588	0.0799572	-0.591655	0.663581	135842	204711	156607	130128	11035.4	128935	194064	140696	177476	154754	154491	110235	303586	180771	158990	315616	181709	209648	194203	176024	133599	192960
12.06_256.2631m/z	256.263	12.0631	pos	Palmitic amide	HMDB0012273	Lipids and lipid-like molecules	Fatty Acyls	Fatty amides	M+H	C16H33NO	50.9	58.7	-1.67369	9.83214	0.0166675	0.0964133	-0.593372	0.662792	2.99918e+06	4.52506e+06	3.35402e+06	2.65558e+06	2.54468e+06	3.51306e+06	2.50786e+06	4.63394e+06	2.97485e+06	3.2169e+06	2.50616e+06	2.08473e+06	3.1089e+06	3.20156e+06	3.04799e+06	8.37019e+06	4.58299e+06	4.39555e+06	3.77896e+06	3.49996e+06	5.11888e+06	6.14567e+06
10.67_555.2729m/z	555.273	10.6671	neg	OKOHA-PA	LMGP20070025	Lipids and lipid-like molecules	Glycerophospholipids	Oxidized glycerophospholipids	M-H2O-H	C28H47O10P	43.6	21	0.106696	3.42669	0.0138408	0.0876015	-0.601639	0.659005	654441	993075	660376	631343	1.00239e+06	1.27769e+06	723749	551593	276048	411189	449857	560178	780680	1.06129e+06	590297	1.24677e+06	1.04313e+06	1.02281e+06	1.31693e+06	1.06411e+06	583485	1.22123e+06
10.64_385.2732m/z	385.273	10.6378	pos	Persicaxanthin	HMDB0034952	Lipids and lipid-like molecules	Prenol lipids	Diterpenoids	M+H	C25H36O3	37.5	0	-1.41834	1.05191	0.0337802	0.142569	-0.606562	0.65676	58126.4	88504.8	54437.3	58986.8	78873.5	124651	79765.6	42610	20175.5	29542.8	45326.7	46895.1	61330.6	94499.5	48955.8	127349	115626	78220.1	101085	110708	43450.8	103823
10.64_311.1686m/z	311.169	10.6368	neg	N-Undecylbenzenesulfonic acid	HMDB0032549	Benzenoids	Benzene and substituted derivatives	Benzenesulfonic acids and derivatives	M-H	C17H28O3S	41.9	13.7	0.00251306	4.03938	0.00814675	0.0680872	-0.609011	0.655646	954269	1.45546e+06	696158	625639	1.13581e+06	1.02419e+06	1.25176e+06	718537	1.23327e+06	1.07325e+06	736311	1.04777e+06	1.64959e+06	1.41092e+06	940696	1.9173e+06	1.00858e+06	2.53125e+06	1.22797e+06	1.1262e+06	1.33013e+06	1.412e+06
12.06_297.2896m/z	297.29	12.0631	pos	Linoleamide	LMFA08010008	Lipids and lipid-like molecules	Fatty Acyls	Fatty amides	M+NH4	C18H33NO	39.7	3.64	-1.68584	3.11237	0.0139396	0.0878736	-0.610102	0.65515	295766	451448	316542	287240	234567	322179	243926	505211	303205	316354	227138	201303	295528	341791	277339	801613	470223	493443	422862	340395	465752	605538
10.14_524.2988m/z	524.299	10.141	pos	Isoamoritin	LMPK12140384	Lipids and lipid-like molecules	Polyketides	Flavonoids	M+NH4	C31H38O6	37.2	0	-3.62899	1.23375	0.017255	0.0981712	-0.613251	0.653722	64448.8	98587.5	84010.7	50249.3	131057	74707.4	68643.7	52763.2	49451	60329.6	32574.9	40701	72047.6	93302.3	99551.4	146359	134230	83643.7	72126.6	51534.8	110252	122827
11.19_636.3498m/z	636.35	11.1936	neg	Allodesmosine	HMDB0040704	Organic acids and derivatives	Carboxylic acids and derivatives	Pentacarboxylic acids and derivatives	M-H2O-H	C30H51N6O10+	43.9	27.7	1.51284	1.99301	0.017722	0.0996038	-0.622054	0.649745	141569	217884	188803	93029.8	261749	122730	144706	139734	106096	174145	73023.1	111675	141077	247407	176087	307187	271563	147643	171128	141856	225471	349420
10.31_313.2731m/z	313.273	10.3114	pos	MG(16:0/0:0/0:0)[rac]	LMGL01010001	Lipids and lipid-like molecules	Glycerolipids	Monoradylglycerols	M+H-H2O	C19H38O4	37.8	0	-1.7976	1.21847	0.0180591	0.100506	-0.633443	0.644636	44605	69194.1	60600.2	47511.1	21203.2	44116.7	52222.8	44697.9	39815.7	54979.1	43049.1	37854.4	65143.1	57095.5	48415.7	140292	74680.6	50568.1	64217.6	50479.8	53357	87691.9
9.90_569.2748n	570.282	9.89997	pos	PS(22:6(4Z,7Z,10Z,13Z,16Z,19Z)/0:0)	LMGP03050013	Lipids and lipid-like molecules	Glycerophospholipids	Glycerophosphoserines	M+H, M+Na	C28H44NO9P	51.2	61.5	-0.995976	2.75781	0.00538051	0.0573503	-0.635227	0.643839	439628	682822	454070	388887	535339	542417	313694	591357	253904	343882	439872	532855	632223	789565	501316	644767	499049	499162	671140	909599	523696	1.1577e+06
9.57_330.3360m/z	330.336	9.57457	pos	Arachidic acid	LMFA01010020	Lipids and lipid-like molecules	Fatty Acyls	Fatty Acids and Conjugates	M+NH4	C20H40O2	44.6	28.8	-1.94138	3.34427	0.00310443	0.0461282	-0.639483	0.641943	330612	515018	289896	285677	357478	408962	338453	299201	317226	385086	296496	327643	332218	388166	431395	701197	624432	513764	373091	375009	579958	830947
10.20_479.3008n	480.308	10.198	pos	LysoPE(0:0/18:1(11Z))	HMDB0011475	Lipids and lipid-like molecules	Glycerophospholipids	Glycerophosphoethanolamines	M+H, 2M+H, 2M+Na	C23H46NO7P	55.9	82.9	-0.886242	13.6989	0.000710876	0.0343983	-0.639858	0.641776	5.45916e+06	8.50633e+06	6.68766e+06	6.60825e+06	3.3739e+06	7.7384e+06	6.84142e+06	4.63676e+06	5.26639e+06	5.01351e+06	3.45148e+06	4.97378e+06	7.49429e+06	7.22806e+06	7.05495e+06	1.0962e+07	1.07795e+07	8.64744e+06	6.60344e+06	6.68613e+06	8.28996e+06	1.13175e+07
1.17_536.1615n	535.154	1.16703	neg	1,4-beta-D-Glucan	HMDB0006944	Organic oxygen compounds	Organooxygen compounds	Carbohydrates and carbohydrate conjugates	M-H, M+FA-H	C18H32O18	52.5	71.4	4.86876	6.03098	0.0469731	0.172586	-0.649567	0.637471	1.76602e+06	2.77035e+06	2.30391e+06	1.67244e+06	1105.77	1.44273e+06	2.6717e+06	1.44624e+06	2.27593e+06	2.07754e+06	1.2708e+06	2.49782e+06	4.69077e+06	1.91657e+06	2.30215e+06	5.35946e+06	2.64881e+06	2.40252e+06	2.75564e+06	2.10472e+06	1.30743e+06	2.21546e+06
9.82_566.3210m/z	566.321	9.81508	pos	LysoPC(20:4(5Z,8Z,11Z,14Z))	HMDB0010395	Unclassified	Unclassified	Unclassified	M+Na	C28H50NO7P	57.6	95.9	-1.22246	3.57432	0.00405	0.050895	-0.662444	0.631807	418049	661671	495611	295864	486571	389006	450266	613443	218412	627269	104177	499866	652343	730352	579399	735297	659404	520039	554119	586308	529669	1.06978e+06
8.29_288.2892m/z	288.289	8.2933	pos	C17 Sphinganine	41558	Unclassified	Unclassified	Unclassified	M+H	C17H37NO2	53.6	73.3	-1.59065	1.45797	0.00112305	0.0357706	-0.679527	0.62437	95229.7	152521	82657.7	96802.2	125151	68286.3	100273	75824.9	79882.1	132805	98174	92440.9	171059	165211	85699.4	201263	128599	134408	154712	110627	228786	144849
1.11_277.1024m/z	277.102	1.10792	pos	gamma-Glutamylglutamic acid	HMDB0011737	Organic acids and derivatives	Carboxylic acids and derivatives	Amino acids, peptides, and analogues	M+H	C10H16N2O7	49.4	55.2	-2.166	1.36403	0.0295866	0.132274	-0.67953	0.624369	85723.4	137296	246510	78111	7.93017e-07	91705.7	90399.6	54823.7	81492.5	89945.6	41172.6	83073.2	171237	118018	103310	174135	154048	129450	165567	114429	134906	107860
6.85_246.2424m/z	246.242	6.85028	pos	Myristic acid	LMFA01010014	Lipids and lipid-like molecules	Fatty Acyls	Fatty Acids and Conjugates	M+NH4	C14H28O2	45.2	30.1	-1.51552	1.5256	0.0428227	0.16372	-0.682946	0.622892	67327.2	108088	53621.3	42560.5	91404.7	66276	91159	46342.5	70553.8	70707	75358.3	65289	75446.3	88786.4	63340.2	166922	199731	75375	46418.7	56764.5	122692	185404
11.46_387.2887m/z	387.289	11.4627	pos	1alpha,25-dihydroxy-21-nor-20-oxavitamin D3 / 1alpha,25-dihydroxy-21-nor-20-oxacholecalciferol	LMST03020029	Lipids and lipid-like molecules	Sterol Lipids	Secosteroids	M+H-H2O	C25H40O4	37.6	0	-1.59092	1.76064	0.0336591	0.142561	-0.686632	0.621303	73328.1	118023	89732.5	80198.8	15410.2	134438	90074.7	77676.9	56152.8	88772.7	38722.7	62102	78336.1	129410	90383.3	209986	176915	84233.1	70527.6	92732.7	69360.8	178347
17.25_861.6181n	844.615	17.2487	pos	Galabiosylceramide (d18:1/16:0)	HMDB0004833	Lipids and lipid-like molecules	Sphingolipids	Glycosphingolipids	M+H-H2O, M+Na	C46H87NO13	38.5	0	0.377534	1.17643	0.0280459	0.128296	-0.693899	0.618181	56552.4	91481.9	68757.9	40019.8	76347.3	47499.7	85717.9	70465.3	20299.3	77156.3	32798.6	46461.4	49288.7	61505.4	66439.6	135800	161405	120217	126367	50763.7	82364	60668.6
9.34_260.2136n	278.247	9.33583	pos	6-[5]-ladderane-1-hexanol	LMFA05000063	Lipids and lipid-like molecules	Fatty Acyls	Fatty alcohols	M+H, M+NH4	C18H28O	48.7	48.7	-1.47469	1.22425	0.00216666	0.0410647	-0.702614	0.614458	89413.5	145516	106818	61997.6	197199	100871	65332.9	76242.8	87109.9	52553.1	85016.4	60994.6	162397	153224	118457	202114	154027	151242	109079	146854	137686	120082
11.18_640.2928m/z	640.293	11.1777	neg	S-(PGA2)-glutathione	HMDB0013062	Organic acids and derivatives	Carboxylic acids and derivatives	Amino acids, peptides, and analogues	M-H	C30H47N3O10S	37.9	0	2.88463	1.15134	0.0183906	0.101441	-0.703874	0.613921	41570.1	67712.4	59112.5	26445.5	86291	36900.5	40908.4	42192.8	29568.5	51086.5	13823.3	29372	48908.8	81332.2	56392.7	101186	88375.5	42645.8	49085.1	38454.2	65748.9	104995
11.64_325.1842m/z	325.184	11.6364	neg	4-Dodecylbenzenesulfonic Acid	HMDB0059915	Benzenoids	Benzene and substituted derivatives	Benzenesulfonic acids and derivatives	M-H	C18H30O3S	41.6	13	-0.338943	5.18186	0.00170937	0.03887	-0.714168	0.609557	938946	1.54038e+06	788954	770768	1.24639e+06	1.18072e+06	1.07982e+06	653772	1.0264e+06	955548	658387	1.0287e+06	1.46713e+06	1.65293e+06	982528	2.15107e+06	1.16627e+06	2.375e+06	1.13883e+06	1.11099e+06	1.47964e+06	1.87936e+06
9.68_544.2680m/z	544.268	9.68192	neg	PE(20:5(5Z,8Z,11Z,14Z,17Z)/0:0)	LMGP02050027	Lipids and lipid-like molecules	Glycerophospholipids	Glycerophosphoethanolamines	M+FA-H	C25H42NO7P	40.1	4.59	-0.105745	1.97351	0.0014891	0.0380572	-0.726757	0.604261	93326.9	154448	101452	71084	59686.9	106184	98921.1	116593	64614.6	120435	89175.7	105123	138922	173241	128558	218222	211835	115299	96975.5	109376	134616	217437
9.04_316.3205m/z	316.321	9.0428	pos	5-methyl-octadecanoic acid	LMFA01020177	Lipids and lipid-like molecules	Fatty Acyls	Fatty Acids and Conjugates	M+NH4	C19H38O2	50.2	56.8	-1.65446	1.16564	0.00370779	0.0492904	-0.741757	0.59801	66213.6	110723	43780.6	70034.9	85974.3	49120.2	78862.3	48766.6	69611.9	87358.3	66195.1	62431.5	102452	142503	64301.9	152693	76943.8	92469.1	122187	77369.3	186641	89670.1
0.75_275.0885m/z	275.089	0.747133	neg	(2S,3'S)-alpha-Amino-2-carboxy-5-oxo-1-pyrrolidinebutanoic acid	HMDB0039110	Organic acids and derivatives	Carboxylic acids and derivatives	Amino acids, peptides, and analogues	M+FA-H	C9H14N2O5	51.8	63	0.252427	1.85518	0.00584774	0.0588917	-0.744622	0.596824	137917	231084	331381	145879	7.93017e-07	127683	175609	87347.9	154347	134204	98463.9	124251	292104	212774	199453	273480	286013	203185	248349	172640	244776	178067
0.76_277.1026m/z	277.103	0.761033	pos	Thymidine glycol	HMDB0042036	Nucleosides, nucleotides, and analogues	Pyrimidine nucleosides	Pyrimidine 2'-deoxyribonucleosides	M+H	C10H16N2O7	38.3	0	-1.46648	2.65073	0.00288223	0.0447482	-0.765894	0.588089	239204	406748	489409	187364	7.93017e-07	248507	277245	182596	293626	307785	170210	235294	294740	292149	344519	466336	492226	475588	562912	358913	408531	371564
9.70_545.2747n	546.282	9.70165	pos	Geldanamycin Analog	96314	Unclassified	Unclassified	Unclassified	M+H, M+Na	C28H39N3O8	37.2	7.24	1.88079	3.30304	0.00172348	0.03887	-0.770417	0.586248	241058	411188	247847	191954	151022	317998	264266	341504	175283	308862	133270	278574	355893	494259	337401	559204	544544	281065	249715	336169	351850	601778
10.20_339.2888m/z	339.289	10.198	pos	Japanic acid	LMFA01170036	Lipids and lipid-like molecules	Fatty Acyls	Fatty Acids and Conjugates	M+H-H2O	C21H40O4	53.4	73.7	-1.55746	2.11775	0.0012129	0.0359558	-0.770811	0.586088	103971	177398	148390	140044	45649.1	156034	136164	80162.5	104192	94340.1	47580.3	87150.2	158215	146816	149843	248187	223334	156318	129281	137256	177381	247346
10.40_524.2978m/z	524.298	10.3963	pos	1-Oleoylglycerophosphoserine	HMDB0061694	Lipids and lipid-like molecules	Glycerophospholipids	Glycerophosphoserines	M+H	C24H46NO9P	38.5	0	-0.906085	3.63988	0.00749356	0.0651538	-0.77095	0.586031	287185	490050	360447	332966	129901	424720	371010	252867	225408	285787	159583	329160	395745	543434	364112	693280	709303	359606	260599	326590	426448	821386
9.60_500.2785m/z	500.278	9.60382	neg	PE(20:4(5Z,8Z,11Z,14Z)/0:0)	LMGP02050009	Lipids and lipid-like molecules	Glycerophospholipids	Glycerophosphoethanolamines	M-H	C25H44NO7P	51.9	61.8	0.406319	10.8561	0.000926977	0.0350162	-0.772495	0.585404	3.23344e+06	5.52344e+06	3.49986e+06	2.81832e+06	2.62825e+06	4.31116e+06	3.4213e+06	2.36171e+06	2.64803e+06	3.64843e+06	3.65811e+06	3.33926e+06	4.49909e+06	4.42956e+06	4.58381e+06	6.35378e+06	7.38642e+06	3.9867e+06	3.81476e+06	4.23505e+06	8.54844e+06	7.39674e+06
11.24_400.3335n	383.33	11.2353	pos	Calcidiol	HMDB0003550	Lipids and lipid-like molecules	Steroids and steroid derivatives	Vitamin D and derivatives	M+H-H2O, M+H	C27H44O2	54.6	83.3	-1.64878	1.4846	0.0342895	0.143866	-0.773958	0.584811	52330.5	89482.8	61159.5	64590.6	15661	90361.4	47863	83900.3	28394	53661.8	23019.4	54694.1	68504.9	98641.2	35435.5	91617.3	112472	63073.2	52677.6	86569.6	86101.5	199736
9.74_200.2006m/z	200.201	9.74405	pos	2-Dodecenal	HMDB0031020	Organic oxygen compounds	Organooxygen compounds	Carbonyl compounds	M+NH4	C12H22O	39.3	0	-1.62898	3.15798	0.000989975	0.0350162	-0.774315	0.584666	310064	530327	281517	240130	516878	330185	264692	224630	312253	302198	362106	266052	410668	576945	540841	840450	641444	505721	307982	376883	449365	652969
10.96_228.2318m/z	228.232	10.9649	pos	Halaminol A	LMSP01080034	Lipids and lipid-like molecules	Sphingolipids	Sphingoid bases	M+H	C14H29NO	47.6	42.5	-1.50618	2.2522	0.00137208	0.0369066	-0.777616	0.58333	117117	200773	114846	95188.8	130932	142296	106256	172048	116739	110700	101701	80460.9	129427	186318	163278	317053	244082	204389	127597	154062	189919	291603
9.62_501.2850n	502.292	9.61683	pos	LysoPE(0:0/20:4(8Z,11Z,14Z,17Z))	HMDB0011488	Lipids and lipid-like molecules	Glycerophospholipids	Glycerophosphoethanolamines	M+H, M+Na, M+H-H2O	C25H44NO7P	55.9	83.2	-1.09814	20.8772	0.00074901	0.0343983	-0.784329	0.580622	9.74825e+06	1.67893e+07	1.06049e+07	8.94311e+06	6.64697e+06	1.55682e+07	1.18714e+07	7.81235e+06	8.53368e+06	1.09141e+07	6.39162e+06	1.01963e+07	1.24947e+07	1.40815e+07	1.2761e+07	2.11615e+07	2.26322e+07	1.27107e+07	1.2329e+07	1.48679e+07	2.0791e+07	2.40636e+07
9.94_518.3212m/z	518.321	9.94228	pos	PC(16:0/0:0)	LMGP01050018	Lipids and lipid-like molecules	Glycerophospholipids	Glycerophosphocholines	M+Na	C24H50NO7P	57.1	92.2	-0.9822	2.21583	0.013411	0.0862617	-0.791973	0.577554	151280	261933	234791	132402	325032	154120	159586	100897	82506.9	147767	67215	108486	216985	214069	206747	351983	294198	141296	185006	179646	379989	449410
10.03_687.2767m/z	687.277	10.0272	neg	N-Desmethylritonavir	HMDB0060896	Organic acids and derivatives	Carboxylic acids and derivatives	Amino acids, peptides, and analogues	M-H2O-H	C36H46N6O5S2	34.7	0	-3.59238	3.10091	0.00192298	0.0395591	-0.798495	0.574949	230831	401481	275122	218128	17201.1	253749	229789	424193	186733	303125	129831	270437	355489	398197	304517	525717	390373	429066	385200	383735	240589	601925
7.84_273.2664n	274.274	7.83843	pos	C16 Sphinganine	41556	Unclassified	Unclassified	Unclassified	M+H, M+Na	C16H35NO2	51.7	62.4	-1.37852	18.4316	0.0094892	0.073222	-0.809995	0.570384	6.98179e+06	1.22405e+07	7.14669e+06	5.44089e+06	6.31931e+06	7.71318e+06	9.06894e+06	5.39165e+06	7.22509e+06	8.35496e+06	5.50693e+06	7.65029e+06	8.43496e+06	1.08858e+07	7.67045e+06	1.7873e+07	1.96421e+07	9.68469e+06	6.24043e+06	6.35569e+06	1.4837e+07	2.07811e+07
11.18_557.3475n	558.355	11.1785	pos	PC(21:4(6Z,9Z,12Z,15Z)/0:0)	40270	Unclassified	Unclassified	Unclassified	M+H, M+Na	C29H52NO7P	40.8	10.6	-1.17687	3.54706	0.00221299	0.0412704	-0.813377	0.569048	273874	481284	306846	331603	154402	518496	389285	179884	280999	243448	114738	219037	440910	417075	388730	671389	655364	421785	330437	378038	402586	706526
10.35_522.2837m/z	522.284	10.3466	neg	PE(18:2(9Z,12Z)/0:0)	LMGP02050011	Lipids and lipid-like molecules	Glycerophospholipids	Glycerophosphoethanolamines	M+FA-H	C23H44NO7P	40.4	7.05	-0.0554534	2.39386	0.00982935	0.074311	-0.828357	0.56317	115249	204644	149404	124467	63229.8	155779	136491	93828.6	92431.9	115539	102519	118803	145876	195735	164875	320773	309161	139233	108514	119755	171267	371248
10.12_480.3100m/z	480.31	10.1199	neg	LysoPC(15:0)	HMDB0010381	Lipids and lipid-like molecules	Glycerophospholipids	Glycerophosphocholines	M-H	C23H48NO7P	51.2	61.3	0.8418	1.30171	0.00274392	0.0439787	-0.829265	0.562816	42924	76266.5	59031.3	39822.5	69769.7	47547.6	52745.7	27230.2	27997.8	45617.2	21230.8	38247.4	55398.1	72014.2	83746	128685	90820.5	46717.3	55685.3	52180.5	71585.7	105833
11.16_508.3395m/z	508.339	11.1643	pos	PA(22:2(13Z,16Z)/0:0)	LMGP10050030	Lipids and lipid-like molecules	Glycerophospholipids	Glycerophosphates	M+NH4	C25H47O7P	38.3	0	-0.632684	1.5416	0.00253272	0.0426653	-0.830601	0.562295	53883.3	95827.4	75104	69869.6	20894.8	73773.5	79637.2	52872	56109.4	48334.1	15604.4	46633.7	79535.5	88508.5	92265.7	111327	113907	63794.7	63580.2	73183.9	106356	165815
10.10_620.2954n	603.292	10.0983	pos	PI(20:4(5Z,8Z,11Z,14Z)/0:0)	LMGP06050006	Lipids and lipid-like molecules	Glycerophospholipids	Glycerophosphoinositols	M+H-H2O, M+Na, M+H	C29H49O12P	56.7	88.1	-1.18682	13.0577	0.0011538	0.0357706	-0.831264	0.562036	3.94352e+06	7.01649e+06	4.81275e+06	3.93246e+06	355214	4.6632e+06	3.78013e+06	7.37908e+06	3.00043e+06	4.93501e+06	2.19613e+06	4.38083e+06	6.20126e+06	6.77987e+06	5.79713e+06	8.55826e+06	6.93489e+06	6.3114e+06	6.62919e+06	7.04796e+06	4.86796e+06	1.1037e+07
9.11_467.3008n	468.308	9.114	pos	PC(14:0/0:0)	LMGP01050012	Lipids and lipid-like molecules	Glycerophospholipids	Glycerophosphocholines	M+H, M+Na	C22H46NO7P	55.4	82.5	-0.838819	1.36279	0.00863784	0.0699734	-0.832211	0.561668	52295.6	93107.6	74423.3	55522.4	99498.2	57425.3	45564.5	34150.8	40064.4	36965	20384.3	58957.3	80532.6	59567.1	77783.5	134202	133991	45893.4	63204	62834.1	137991	135077
9.59_524.2783m/z	524.278	9.58815	neg	LysoPE(22:6(4Z,7Z,10Z,13Z,16Z,19Z)/0:0)	HMDB0011526	Lipids and lipid-like molecules	Glycerophospholipids	Glycerophosphoethanolamines	M-H	C27H44NO7P	52.6	66.3	0.0928922	6.66076	0.0004489	0.033089	-0.832574	0.561526	1.16334e+06	2.07174e+06	1.16256e+06	1.04605e+06	1.16261e+06	1.63775e+06	1.3385e+06	779668	997780	988633	1.36568e+06	1.15417e+06	1.65674e+06	1.61336e+06	1.76963e+06	2.67997e+06	2.50436e+06	1.52801e+06	1.38707e+06	1.69895e+06	3.15712e+06	2.72225e+06
9.90_544.2682m/z	544.268	9.89782	neg	PS(20:4(5Z,8Z,11Z,14Z)/0:0)	LMGP03050007	Lipids and lipid-like molecules	Glycerophospholipids	Glycerophosphoserines	M-H	C26H44NO9P	53.7	71.8	0.241243	3.20808	0.00021752	0.0272864	-0.833942	0.560994	279796	498749	344567	234289	175416	301824	215888	499025	164270	315927	228460	318288	447277	545398	398300	504044	397790	449435	464950	535490	458333	786477
10.98_530.3254m/z	530.325	10.978	neg	PC(19:3(10Z,13Z,16Z)/0:0)	LMGP01050003	Lipids and lipid-like molecules	Glycerophospholipids	Glycerophosphocholines	M-H	C27H50NO7P	40.1	6.53	0.269862	1.11105	0.00151556	0.0380572	-0.840419	0.558481	27835.9	49842.2	42198.2	29045.5	13904.7	39594.8	29992.9	18854.9	27774.2	20940.6	33358.4	22695.1	42689.1	49092.9	47370.7	76497.6	57304.4	35834.4	31035.9	32131.6	50039	76426.1
11.21_523.3634n	524.371	11.2069	pos	LysoPC(18:0)	HMDB0010384	Lipids and lipid-like molecules	Glycerophospholipids	Glycerophosphocholines	M+H, M+Na, M+H-H2O	C26H54NO7P	57.6	90.4	-0.811242	22.4159	0.0120219	0.0814705	-0.874648	0.545387	1.26073e+07	2.31163e+07	1.72556e+07	7.80202e+06	2.78061e+07	1.15427e+07	1.23122e+07	1.20342e+07	7.50927e+06	1.51045e+07	6.00557e+06	8.70093e+06	1.42014e+07	2.41788e+07	1.82937e+07	2.93148e+07	3.73535e+07	1.05377e+07	1.61193e+07	1.30877e+07	3.13214e+07	3.67543e+07
12.81_334.3098m/z	334.31	12.8082	pos	2,4,12-Octadecatrienoic acid isobutylamide	HMDB0032033	Lipids and lipid-like molecules	Fatty Acyls	Fatty amides	M+H	C22H39NO	38	0	-1.98499	1.26874	0.0420856	0.161893	-0.878581	0.543902	33704.5	61968	29130.2	32415.5	25926.9	43768.1	48884.9	46723.9	42573.7	20697.6	28698.4	18225.9	48490	52213.3	37861.3	153719	101810	65609.3	25252	21905.7	52782.6	60036.6
1.15_551.1724n	550.165	1.15305	neg	Haloperidol glucuronide	HMDB0060904	Organic oxygen compounds	Organooxygen compounds	Carbohydrates and carbohydrate conjugates	M-H, M+FA-H	C27H31ClFNO8	34.1	2.39	0.336668	2.51806	0.0153344	0.0927228	-0.880833	0.543054	194077	357382	280617	195126	7.93017e-07	177449	289267	164006	278837	207765	136355	211352	615867	246841	282267	715266	354779	305310	337407	277747	157063	281271
10.14_495.3320n	496.339	10.141	pos	PC(0:0/16:0)	LMGP01050074	Lipids and lipid-like molecules	Glycerophospholipids	Glycerophosphocholines	M+H, M+K, M+Na, 2M+H, M+H-H2O	C24H50NO7P	55.3	79.3	-1.08729	26.0524	0.00713791	0.0637503	-0.883747	0.541958	1.48847e+07	2.74647e+07	2.27298e+07	1.17373e+07	2.74468e+07	1.87509e+07	1.56792e+07	1.0463e+07	1.00445e+07	1.61936e+07	6.3212e+06	9.48072e+06	1.99093e+07	2.26497e+07	2.37977e+07	4.30138e+07	4.09794e+07	1.33011e+07	1.88171e+07	1.63665e+07	3.47022e+07	4.11099e+07
10.06_520.2658m/z	520.266	10.0595	neg	LysoPE(0:0/18:3(6Z,9Z,12Z))	HMDB0011478	Lipids and lipid-like molecules	Glycerophospholipids	Glycerophosphoethanolamines	M+FA-H	C23H42NO7P	38.6	2.18	-4.8291	2.09402	0.000850746	0.0346339	-0.887024	0.540728	79952.8	147861	134815	65115.4	46912.9	96561.5	96272.9	80655.2	65146.6	120616	30334.8	63096.8	116075	147086	138948	206136	184274	109927	104010	94256.1	165414	212486
9.60_525.2851n	526.292	9.6028	pos	LysoPE(0:0/22:6(4Z,7Z,10Z,13Z,16Z,19Z))	HMDB0011496	Lipids and lipid-like molecules	Glycerophospholipids	Glycerophosphoethanolamines	M+H, M+Na	C27H44NO7P	55.6	85.1	-0.877346	13.1732	0.000356175	0.0304275	-0.89339	0.538348	3.38127e+06	6.28084e+06	3.40892e+06	3.13373e+06	2.64359e+06	5.74225e+06	4.18084e+06	2.4999e+06	3.07174e+06	3.53061e+06	2.07228e+06	3.52886e+06	4.63536e+06	4.89238e+06	5.18032e+06	8.80051e+06	7.93161e+06	4.64621e+06	4.44162e+06	5.77961e+06	7.58088e+06	8.91984e+06
10.11_527.3003n	528.308	10.1125	pos	LysoPE(22:5(4Z,7Z,10Z,13Z,16Z)/0:0)	HMDB0011524	Lipids and lipid-like molecules	Glycerophospholipids	Glycerophosphoethanolamines	M+H, M+Na	C27H46NO7P	56.8	89.7	-1.64187	16.4771	0.000659741	0.0343983	-0.89607	0.537349	4.83407e+06	8.99616e+06	5.78791e+06	4.37805e+06	2.30326e+06	8.53974e+06	6.56655e+06	4.05207e+06	4.08919e+06	5.35041e+06	2.54407e+06	4.72946e+06	6.73815e+06	7.78253e+06	6.8236e+06	1.37025e+07	1.2029e+07	7.82206e+06	7.09558e+06	7.55928e+06	8.10592e+06	1.23029e+07
11.44_320.2350n	319.228	11.443	neg	3R-HETE	LMFA03060023	Lipids and lipid-like molecules	Fatty Acyls	Eicosanoids	M-H, 2M-H	C20H32O3	44.6	26.4	-0.393682	4.21125	0.00906179	0.0715034	-0.908098	0.532887	422500	792851	534794	570136	20179.3	852425	469553	770555	205541	316974	241137	243707	831966	969481	377844	725983	1.21555e+06	903051	472313	891298	381563	1.15946e+06
11.09_581.3079m/z	581.308	11.093	pos	1-Oleoylglycerophosphoinositol	HMDB0061693	Lipids and lipid-like molecules	Glycerophospholipids	Glycerophosphoinositols	M+H-H2O	C27H51O12P	37.6	0	-0.999008	1.33932	0.0323107	0.139352	-0.914558	0.530506	44022.6	82982.2	112969	54621.9	7.93017e-07	29878.1	79772.7	45353.5	33813	41624.6	7.93017e-07	42193.4	80631.3	113385	26231.9	63881.3	110351	54264.2	93224.1	62857.3	54575.2	170420
8.15_288.2893m/z	288.289	8.15322	pos	Heptadecanoic acid	HMDB0002259	Lipids and lipid-like molecules	Fatty Acyls	Fatty acids and conjugates	M+NH4	C17H34O2	44.6	27.7	-1.31727	1.75753	0.00397284	0.050474	-0.922782	0.527491	161656	306463	97114.5	149778	212853	152789	246630	113590	140636	166680	150390	186102	515934	467176	139101	311589	146210	386500	271373	210252	395259	221234
9.91_540.3309m/z	540.331	9.91368	neg	LysoPC(0:0/16:0)	HMDB0240262	Lipids and lipid-like molecules	Glycerophospholipids	Glycerophosphocholines	M+FA-H	C24H50NO7P	55.6	79.5	0.318602	3.77657	0.00336543	0.0475795	-0.925223	0.526599	292794	556010	415316	248478	536156	315323	288887	195085	213189	304509	198789	212211	443671	430845	437777	894445	733722	341176	371576	344217	671667	891003
10.69_574.3099m/z	574.31	10.6948	pos	Pentoxifylline	HMDB0014944	Organoheterocyclic compounds	Imidazopyrimidines	Purines and purine derivatives	2M+NH4	C13H18N4O3	39.3	0	0.523007	2.06032	0.0112167	0.0790409	-0.926606	0.526095	75735.4	143958	124730	84504.5	31486.1	115094	82843.4	73912.2	62939.8	78063.3	32270.2	71510.6	132671	156227	116525	242210	224190	70076.8	96790.8	91356.8	63755.8	245775
13.65_861.6188n	844.616	13.6543	pos	Manbeta1-4Glcbeta-Cer(d18:1/16:0)	LMSP0501AD01	Lipids and lipid-like molecules	Sphingolipids	Neutral glycosphingolipids	M+H-H2O, M+Na	C46H87NO13	36.2	0	1.26119	1.01052	0.0135153	0.0867062	-0.944545	0.519594	27159.9	52271.4	43496.5	23256.1	22864.8	8453.68	55149.8	51400.7	4130.39	25969.6	24197.6	12679.6	17044.2	36031.4	34543.9	102703	67072.9	54123.8	56205.5	59265.5	55308.2	40415.7
9.79_656.3184m/z	656.318	9.78973	neg	OKOOA-PS	LMGP20040029	Lipids and lipid-like molecules	Glycerophospholipids	Oxidized glycerophospholipids	M-H2O-H	C32H54NO12P	42.5	22.6	-3.08741	1.68592	0.00200593	0.0402453	-0.944759	0.519516	47429.2	91294.8	56359.2	29649.5	40318.8	48433.6	48731.2	75799	31798.5	82187.7	6524.05	54490.1	81861.8	100155	65126.1	135476	104691	76401.3	66135.3	66883.1	64147	152071
10.08_313.2731m/z	313.273	10.084	pos	MG(i-16:0/0:0/0:0)	HMDB0072844	Lipids and lipid-like molecules	Glycerolipids	Monoradylglycerols	M+H-H2O	C19H38O4	38.2	0	-1.98391	1.06908	0.000871007	0.0347479	-0.950321	0.517517	20217.3	39065.8	31820.6	17774.5	11593.7	22054.2	24969.3	21647.3	16564	23016	15456.7	17276.2	28334.6	36602.2	31371.4	50512.8	56183.7	23508.4	26731.6	26979.2	50074.4	60360.1
9.93_495.3314n	496.339	9.92822	pos	LysoPC(16:0)	HMDB0010382	Lipids and lipid-like molecules	Glycerophospholipids	Glycerophosphocholines	M+H-H2O, 2M+H, M+H	C24H50NO7P	57	90.1	-2.21849	8.14236	0.00555399	0.058066	-0.958128	0.514724	1.34545e+06	2.61392e+06	1.92247e+06	1.0948e+06	2.52201e+06	1.59783e+06	1.45197e+06	885880	910390	1.2944e+06	762640	1.01207e+06	1.88076e+06	1.96611e+06	1.89088e+06	3.82195e+06	3.74329e+06	1.35389e+06	1.72324e+06	1.61531e+06	3.90908e+06	4.23464e+06
12.28_304.2395n	305.247	12.2782	pos	(-)-Cladielline	LMPR0104210003	Lipids and lipid-like molecules	Prenol lipids	Isoprenoids	M+H-H2O, M+H	C20H32O2	54.5	78.5	-2.5215	6.34415	0.00561838	0.058066	-0.960476	0.513887	864304	1.68189e+06	978567	596127	1.61936e+06	1.38781e+06	621994	1.22228e+06	413438	835791	514447	453219	1.58922e+06	1.66829e+06	1.35171e+06	2.05524e+06	1.81885e+06	886639	1.25213e+06	1.23914e+06	1.49973e+06	3.458e+06
9.86_361.2731m/z	361.273	9.85757	pos	O-Arachidonoyl Glycidol	44872	Unclassified	Unclassified	Unclassified	M+H	C23H36O3	55.1	82.7	-1.77037	4.60399	0.00227288	0.0414267	-0.968273	0.511117	332054	649662	379426	282643	66715.2	458377	365637	526732	250143	463066	163117	364681	523388	608582	525393	1.01176e+06	939157	470568	439728	495026	449357	1.03366e+06
11.44_456.2983m/z	456.298	11.443	neg	(9Z,12Z)-3-hydroxyhexadecadienoylcarnitine	LMFA07070026	Lipids and lipid-like molecules	Fatty Acyls	Fatty esters	M+FA-H	C23H41NO5	39	3.21	3.86791	1.05089	0.00491736	0.0550384	-0.976886	0.508075	22509.5	44303.4	30870.1	32085	208.288	44379.5	26355.4	39735.1	10840.9	18240.6	10030.7	12349.2	44285	48634.3	21431.5	40579.7	69576.8	48627.7	29946.4	48381.8	25032.7	66538.4
10.04_638.3292m/z	638.329	10.0415	pos	Desmethylcitalopram	HMDB0060576	Benzenoids	Benzene and substituted derivatives	Phenylbutylamines	2M+NH4	C19H19FN2O	38.8	0	-1.39463	1.06524	0.00375209	0.0494562	-0.978912	0.507362	21827	43020.5	33242	26671.5	1160.1	19537.1	18071.2	49346.5	14213.5	23831.4	4762.18	27434.5	43174	47164.6	23867.2	53176.7	55692.3	34428.3	37562.4	45103.7	21075.1	68961
10.06_619.2890m/z	619.289	10.0595	neg	1-Arachidonoylglycerophosphoinositol	HMDB0061690	Lipids and lipid-like molecules	Glycerophospholipids	Glycerophosphoinositols	M-H	C29H49O12P	49.4	48.2	0.200467	16.5227	0.000487275	0.033665	-0.980257	0.506889	4.54415e+06	8.96478e+06	5.93925e+06	4.47325e+06	882791	5.01459e+06	4.46004e+06	7.59943e+06	3.58122e+06	5.95994e+06	2.69066e+06	4.84038e+06	7.55344e+06	8.1837e+06	6.81917e+06	1.23312e+07	9.71384e+06	8.49816e+06	7.73147e+06	7.34876e+06	6.4605e+06	1.50076e+07
10.72_454.3884m/z	454.388	10.7232	pos	27-Deoxy-5b-cyprinol	HMDB0001231	Lipids and lipid-like molecules	Steroids and steroid derivatives	Bile acids, alcohols and derivatives	M+NH4	C27H48O4	38.4	0	-1.4732	1.6859	0.0456998	0.170143	-0.982686	0.506037	50913.6	100612	38950.1	48288.6	74394.9	134151	27301	69583.6	20413.9	31327.6	6641.75	58083.5	44223.3	83215.7	91084.7	183853	128950	33652.5	36523.9	47316.8	151605	205700
8.02_271.2508n	272.258	8.01627	pos	2S-aminohexadecanoic acid	LMFA01100017	Lipids and lipid-like molecules	Fatty Acyls	Fatty Acids and Conjugates	M+H-H2O, M+H	C16H33NO2	41.3	11.6	-1.38419	1.63988	0.00763445	0.0659346	-0.987671	0.504291	44043.5	87337.4	43355.1	39122.2	45337.1	51705	50384.1	31455.8	52807	46952.5	37676.3	41639.5	63112.9	77183.7	57458.1	136136	134026	61525.1	41209.2	39545.6	91890.6	171286
10.33_497.2748n	498.282	10.3255	pos	PS(16:0/0:0)	LMGP03050002	Lipids and lipid-like molecules	Glycerophospholipids	Glycerophosphoserines	M+H, M+Na	C22H44NO9P	53.4	72.2	-1.11475	3.89928	0.00127916	0.0361887	-0.989889	0.503517	283006	562059	561898	382088	74391.1	384154	287035	207896	308161	281322	124416	218700	380549	509596	400662	890115	639621	290365	572737	499476	759029	678441
13.04_284.2944m/z	284.294	13.0402	pos	Stearamide	LMFA08010003	Lipids and lipid-like molecules	Fatty Acyls	Fatty amides	M+H	C18H37NO	49	49.4	-1.48978	7.45217	0.0220454	0.112157	-0.990529	0.503293	964202	1.91579e+06	1.40454e+06	802550	819873	1.19723e+06	675098	1.39705e+06	882071	1.05897e+06	825882	578762	1.50887e+06	1.23725e+06	1.16553e+06	5.05084e+06	1.98093e+06	1.66825e+06	1.41779e+06	1.05608e+06	1.77964e+06	2.29268e+06
10.42_634.3342m/z	634.334	10.4209	neg	OHHdiA-PE	LMGP20020043	Lipids and lipid-like molecules	Glycerophospholipids	Oxidized glycerophospholipids	M-H	C30H54NO11P	38.9	5.55	-3.07377	1.94762	0.00109131	0.0357052	-1.00026	0.49991	62779.1	125581	110668	71242.8	37596.3	68601.7	65027.9	65388.6	58747.9	78822.5	12022.6	59672.9	95843.6	133052	112813	154394	159908	83001.3	89234	78675.7	127412	221474
11.60_557.2886m/z	557.289	11.6037	neg	OHOHA-PA	LMGP20070027	Lipids and lipid-like molecules	Glycerophospholipids	Oxidized glycerophospholipids	M-H2O-H	C28H49O10P	39.5	0.597	0.1035	6.34278	0.00701504	0.0631482	-1.00342	0.498817	636037	1.27509e+06	878844	698437	159926	1.3902e+06	704288	721833	310061	676094	212318	608364	733018	1.25625e+06	878907	2.39192e+06	1.52467e+06	1.03252e+06	1.18677e+06	1.12466e+06	617905	2.00427e+06
10.11_387.2886m/z	387.289	10.1125	pos	1alpha,25-dihydroxy-24-nor-22-oxavitamin D3 / 1alpha,25-dihydroxy-24-nor-22-oxacholecalciferol	LMST03020030	Lipids and lipid-like molecules	Sterol Lipids	Secosteroids	M+H-H2O	C25H40O4	38	0	-1.9534	1.63187	0.000227976	0.0272864	-1.01001	0.496544	41173.6	82920.2	50859.8	33617	9577.53	75453.7	51657.3	44915.7	35428.3	56038.3	22832.6	31355.5	60436.9	83694.9	73424.2	125040	107578	77322.7	62623.9	67565.9	67848.3	103668
10.45_480.3443m/z	480.344	10.453	pos	1-(2-methoxy-octadecanyl)-sn-glycero-3-phosphoethanolamine	LMGP02060021	Lipids and lipid-like molecules	Glycerophospholipids	Glycerophosphoethanolamines	M+H-H2O	C24H52NO7P	38.5	0	-1.19869	1.90759	0.0178363	0.0998714	-1.01457	0.494978	74447.8	150406	92656.2	47386.6	206787	102157	74705.1	47144.9	32073.4	59916.7	27408.3	54243.1	95379.8	129599	104127	239013	232862	54421.8	102759	85016.9	192601	268284
16.90_385.3458m/z	385.346	16.9029	pos	7-dehydrocholesterol	3902	Lipids and lipid-like molecules	Steroids and steroid derivatives	Cholestane steroids	M+H	C27H44O	54.5	79.5	-1.86521	1.05219	0.0239114	0.117838	-1.01678	0.494218	37192.5	75255.2	90649.8	62640.9	26585.7	34206.1	27333.9	29366.4	45332.1	24176.4	10378.7	21254.9	57677.9	72428.1	134034	73935	77204.9	20424.1	27728.1	34236.9	138979	115903
7.89_230.2475m/z	230.247	7.88525	pos	Xestoaminol C	53933	Unclassified	Unclassified	Unclassified	M+H	C14H31NO	45.1	29.5	-1.50388	5.21026	0.00895643	0.0712673	-1.03124	0.489291	413448	844994	468678	312551	362553	447768	554120	301554	417359	517607	289584	462708	496740	701902	479787	1.24124e+06	1.3194e+06	583424	392756	399416	1.20477e+06	1.6305e+06
12.13_385.1665m/z	385.167	12.134	pos	3b,16a-Dihydroxyandrostenone sulfate	HMDB0000386	Lipids and lipid-like molecules	Steroids and steroid derivatives	Sulfated steroids	M+H	C19H28O6S	36.1	0	-3.66135	1.00116	0.00795068	0.0674234	-1.04105	0.485973	17241.2	35477.7	15941.4	10104.4	23505.6	34478	12682.1	30079.8	7861.38	21350.5	4851.97	11556.7	19690.5	29530	43496.7	65289.8	46381.9	22463.8	24050.4	28497.2	17935.9	57440.2
9.76_501.2850n	502.292	9.75845	pos	LysoPE(20:4(8Z,11Z,14Z,17Z)/0:0)	HMDB0011518	Lipids and lipid-like molecules	Glycerophospholipids	Glycerophosphoethanolamines	M+H, M+Na, M+H-H2O	C25H44NO7P	54.1	73.8	-1.16515	13.204	0.00222043	0.0412704	-1.04869	0.483405	2.64512e+06	5.47185e+06	3.8788e+06	2.42555e+06	1.2855e+06	3.07555e+06	2.68141e+06	3.69485e+06	1.84239e+06	3.74969e+06	797406	3.02006e+06	4.64954e+06	5.51204e+06	4.09831e+06	6.61718e+06	6.67855e+06	3.16061e+06	3.32216e+06	4.0015e+06	5.82889e+06	1.08497e+07
11.80_378.2764n	379.284	11.8039	pos	1-AG	62360	Unclassified	Unclassified	Unclassified	M+H-H2O, M+H	C23H38O4	55.6	85.1	-1.69826	1.65919	0.0163991	0.0955059	-1.04983	0.483024	49698.6	102891	47085.6	24280.9	129682	56338.8	57603.9	49813.8	21233.2	42939.7	27033.9	40974.4	100577	83933	68080.9	188575	139071	65876.2	48140.4	52505	79039	203108
7.93_186.2214m/z	186.221	7.92942	pos	1-Dodecene	HMDB0059874	Hydrocarbons	Olefins	Acyclic olefins	M+NH4	C12H24	42	13.3	-1.19638	1.67628	0.0165162	0.095922	-1.05455	0.481446	42116.3	87478.8	46992.4	24515.8	37030.8	47763.8	60649.4	31602	46193.3	57497.2	24672.4	44246.2	44301.6	84366.3	48655.4	116964	129598	53812.6	40805.1	36723.1	122850	196713
10.41_635.3802n	616.362	10.4059	neg	PHOHA-PC	LMGP20010012	Lipids and lipid-like molecules	Glycerophospholipids	Oxidized glycerophospholipids	M-H2O-H, M+FA-H	C31H58NO10P	50.5	59.5	0.507691	1.61845	0.0154912	0.0929582	-1.0549	0.481329	42389.9	88068.5	98923.5	64413.3	15965.3	56467.7	30858.2	36849.9	42905.9	44920.4	4704.47	27890.7	59111.9	77923	86259.7	135849	163113	41765.9	33619.6	32153.6	126348	124541
10.52_572.2977m/z	572.298	10.5237	pos	PS(20:2(11Z,14Z)/0:0)	LMGP03050021	Lipids and lipid-like molecules	Glycerophospholipids	Glycerophosphoserines	M+Na	C26H48NO9P	45.9	62.7	3.31284	5.43393	0.00118663	0.0357706	-1.05595	0.48098	460642	957715	637044	412955	80874.1	756139	523750	685024	333642	507442	191908	477642	782297	1.08363e+06	538454	1.42883e+06	982368	629124	962170	999484	581974	1.58881e+06
13.50_319.2626m/z	319.263	13.5012	pos	Arachidonic Acid methyl ester	62953	Unclassified	Unclassified	Unclassified	M+H	C21H34O2	53.1	71.2	-1.71089	1.22465	0.0153955	0.0927883	-1.05642	0.480822	23112.8	48069.3	21872.2	16582.8	26262.6	44713.6	18188.4	37046.1	5945.28	36845.9	3009.52	20661.6	34986	63597	38152.2	90146.3	49950.6	12413.4	26081.2	38997.2	34788.4	91580.7
17.49_369.3510m/z	369.351	17.4922	pos	Lathosterol	LMST01010089	Lipids and lipid-like molecules	Sterol Lipids	Sterols	M+H-H2O	C27H46O	38.8	0	-1.41101	7.45089	0.00360407	0.0487153	-1.07091	0.47602	929794	1.95327e+06	1.47069e+06	704763	1.35292e+06	1.085e+06	976408	764946	656333	864317	740623	681937	1.47349e+06	1.97677e+06	1.02271e+06	2.26967e+06	2.77366e+06	964606	1.35477e+06	1.33912e+06	2.442e+06	3.91589e+06
9.60_564.3308m/z	564.331	9.60382	neg	LysoPC(18:2(9Z,12Z))	HMDB0010386	Lipids and lipid-like molecules	Glycerophospholipids	Glycerophosphocholines	M+FA-H	C26H50NO7P	56	84	0.2564	1.54453	0.00950939	0.0732616	-1.07285	0.475379	39596.3	83294.1	46064.9	28559.6	83391.1	40220.1	35604.4	33824.6	19971.4	46770.7	22887.8	38668.4	66185.1	88531.6	57422.4	143261	147054	36210.9	32015.1	38336.5	97822.1	126103
7.84_274.1279m/z	274.128	7.83843	pos	2-hydroxy-3-(3,4,5-trimethoxyphenyl)propanoic acid	HMDB0141330	Phenylpropanoids and polyketides	Phenylpropanoic acids	Unclassified	M+NH4	C12H16O6	38.6	0	-2.20394	1.03662	0.00867282	0.0700238	-1.07428	0.47491	16007.9	33707.3	12423.6	14557.2	11851.8	16693.7	22072.8	16198.7	17601.9	21147.8	9554.54	17977.2	16949.4	36162.7	16400.3	39534.6	62753.4	32606.7	18907.7	15373.5	31752.2	66632.9
10.64_572.2955n	555.292	10.6378	pos	1-Palmitoylglycerophosphoinositol	HMDB0061695	Lipids and lipid-like molecules	Glycerophospholipids	Glycerophosphoinositols	M+H-H2O, M+Na	C25H49O12P	51.6	76.3	-1.20209	6.30265	0.00220667	0.0412704	-1.07492	0.474697	602815	1.26989e+06	927872	603694	401518	1.00209e+06	747021	582600	400930	656076	242623	463725	1.12903e+06	1.16617e+06	1.03424e+06	2.54261e+06	1.56076e+06	775413	1.06021e+06	1.03418e+06	705911	1.6904e+06
10.74_507.3685n	508.376	10.7374	pos	LysoPC(P-18:0)	HMDB0013122	Lipids and lipid-like molecules	Glycerophospholipids	Glycerophosphocholines	M+H, M+Na	C26H54NO6P	42.5	18.9	-0.70673	3.25426	0.00636526	0.0603968	-1.07642	0.474205	168357	355029	350667	168575	249769	280354	172311	96422.5	72564.8	155311	42059.9	95530.7	212191	295992	325656	610443	522128	157306	243030	194388	436611	552547
11.90_526.3132m/z	526.313	11.9048	pos	PG(18:2(9Z,12Z)/0:0)	LMGP04050014	Lipids and lipid-like molecules	Glycerophospholipids	Glycerophosphoglycerols	M+NH4	C24H45O9P	37.9	0	-1.37869	3.00923	0.00208795	0.040977	-1.08419	0.471658	186404	395209	345235	257275	105229	196892	226715	122959	127663	170686	121333	190049	287329	455636	252488	410911	419967	162046	307322	339035	739711	577646
9.75_500.2785m/z	500.278	9.74502	neg	LysoPE(20:4(5Z,8Z,11Z,14Z)/0:0)	HMDB0011517	Lipids and lipid-like molecules	Glycerophospholipids	Glycerophosphoethanolamines	M-H	C25H44NO7P	52.1	62.4	0.375003	7.79156	0.00130422	0.0364025	-1.08514	0.471345	849790	1.8029e+06	1.29138e+06	801485	331136	937705	761838	1.21474e+06	631470	1.34823e+06	252354	927562	1.48163e+06	1.81253e+06	1.38748e+06	2.32487e+06	2.14706e+06	1.24725e+06	1.08812e+06	1.2499e+06	1.88034e+06	3.40985e+06
10.89_574.3121m/z	574.312	10.8941	pos	PS(20:1(11Z)/0:0)	LMGP03050020	Lipids and lipid-like molecules	Glycerophospholipids	Glycerophosphoserines	M+Na	C26H50NO9P	38.1	0	1.05123	2.20599	0.000721403	0.0343983	-1.08857	0.470227	78573.4	167097	95067	63722.6	82448.5	119927	68257.7	87099.1	47011	90178.9	56364.7	75657.6	137433	165247	136484	235105	164223	93992.4	120494	166748	131377	319862
10.38_529.3162n	530.324	10.3821	pos	LysoPE(0:0/22:4(7Z,10Z,13Z,16Z))	HMDB0011493	Lipids and lipid-like molecules	Glycerophospholipids	Glycerophosphoethanolamines	M+H, M+Na	C27H48NO7P	57.5	91	-1.12046	10.0328	0.000254857	0.0273714	-1.09386	0.468507	1.43155e+06	3.05556e+06	1.93752e+06	1.40409e+06	882499	2.74548e+06	1.74653e+06	1.0827e+06	1.18895e+06	1.53118e+06	712707	1.08382e+06	2.47447e+06	2.48147e+06	2.35189e+06	4.10902e+06	4.31376e+06	2.32629e+06	2.01039e+06	2.42048e+06	3.52482e+06	4.54296e+06
10.40_437.2901n	438.297	10.3963	pos	PE(P-16:0/0:0)	LMGP02070001	Lipids and lipid-like molecules	Glycerophospholipids	Glycerophosphoethanolamines	M+H, M+Na	C21H44NO6P	50.2	57	-1.18039	5.01333	0.00303489	0.0460062	-1.11205	0.462635	425345	919397	543969	302051	902786	577337	487365	298680	217198	391598	251147	281324	606513	838664	706953	1.37289e+06	1.21816e+06	432400	582701	554711	1.37582e+06	1.50516e+06
11.49_293.1794m/z	293.179	11.4898	neg	Sodium Tetradecyl Sulfate	HMDB0014607	Organic acids and derivatives	Organic sulfuric acids and derivatives	Sulfuric acid esters	M-H	C14H30O4S	38.4	0	0.608634	2.31126	0.000557913	0.0343983	-1.11303	0.462321	78971.2	170815	89943.5	85858.3	79524.6	141573	71039.5	60824.8	58932.6	60756.1	55750.3	85509	108710	174207	102623	241422	187404	171464	97785.1	114164	232634	277733
10.10_526.2939m/z	526.294	10.1047	neg	PE(22:5(4Z,7Z,10Z,13Z,16Z)/0:0)	LMGP02050069	Lipids and lipid-like molecules	Glycerophospholipids	Glycerophosphoethanolamines	M-H	C27H46NO7P	53.2	68.7	-0.0986824	8.83949	0.000239588	0.0273714	-1.11759	0.460863	1.0562e+06	2.29178e+06	1.46745e+06	967440	489961	1.75612e+06	1.29369e+06	893372	909826	1.06463e+06	806506	912977	1.89415e+06	2.13325e+06	1.82864e+06	3.62728e+06	3.18531e+06	1.74315e+06	1.53975e+06	1.60488e+06	2.05002e+06	3.31139e+06
9.79_588.3310m/z	588.331	9.78973	neg	PC(20:4(8Z,11Z,14Z,17Z)/0:0)	LMGP01050140	Lipids and lipid-like molecules	Glycerophospholipids	Glycerophosphocholines	M+FA-H	C28H50NO7P	55.8	80.1	0.474952	6.65709	0.00124262	0.0361569	-1.11996	0.460106	582797	1.26666e+06	717337	383494	536156	609195	571084	918675	336694	1.02206e+06	103304	629978	1.06196e+06	1.26678e+06	922926	1.87754e+06	1.62974e+06	983984	860698	835169	949930	2.27786e+06
10.22_634.3341m/z	634.334	10.2241	neg	Pentasine	HMDB0029803	Organic acids and derivatives	Carboxylic acids and derivatives	Pentacarboxylic acids and derivatives	M-H2O-H	C30H49N6O10+	37.3	0	1.47135	1.72215	0.00234195	0.0420001	-1.12326	0.459055	38127.5	83056.5	68801.6	40196.2	4288.82	53489.2	48476.9	43578.8	35260.2	49327.8	3990.25	33865.5	64559	92520.3	66926.5	124050	126767	50802.5	46695.1	46433.1	76833.8	134977
9.75_600.2038m/z	600.204	9.74502	neg	2-amino-4-({1-[(carboxymethyl)-C-hydroxycarbonimidoyl]-2-[(1-{3,5-dihydroxy-4-[(1E)-3-methylbut-1-en-1-yl]phenyl}-2-hydroxy-2-(4-hydroxyphenyl)ethyl)sulfanyl]ethyl}-C-hydroxycarbonimidoyl)butanoic acid	HMDB0129017	Organic acids and derivatives	Carboxylic acids and derivatives	Amino acids, peptides, and analogues	M-H2O-H	C29H37N3O10S	38.2	0	2.70115	1.08348	0.00138976	0.036962	-1.13149	0.456443	15589.3	34154	27039.5	14846	3653.52	16511	12957.8	26929.1	11844.5	24370.8	1898.87	15842.2	29045.3	39479.6	28369.1	46638.4	39220.1	23654.2	19741	21288.6	32855.7	61247.7
10.18_545.3478n	546.355	10.1838	pos	LysoPC(20:3(5Z,8Z,11Z))	HMDB0010393	Lipids and lipid-like molecules	Glycerophospholipids	Glycerophosphocholines	M+H, M+Na	C28H52NO7P	58.1	94.8	-0.577551	4.13846	0.000992969	0.0350162	-1.13208	0.456257	244169	535156	316740	167338	319693	253716	253292	408177	122143	326583	49762.7	224241	480785	682487	415489	746307	696380	297037	274785	322666	567880	867747
10.67_522.2838m/z	522.284	10.6671	neg	PS(18:1(9Z)/0:0)	40829	Unclassified	Unclassified	Unclassified	M-H	C24H46NO9P	56.1	85.7	0.117371	3.15618	0.00127518	0.0361887	-1.13449	0.455496	152410	334602	261029	206003	34597.4	199992	154797	160356	119160	151397	59624.1	177141	255170	319121	217536	367189	302057	260505	278866	269435	385917	690220
9.87_444.3678m/z	444.368	9.8717	pos	3-hydroxyoctadecanoylcarnitine	LMFA07070043	Lipids and lipid-like molecules	Fatty Acyls	Fatty esters	M+H	C25H49NO5	38.3	0	-1.17318	1.44773	0.021237	0.109934	-1.13822	0.454319	35014.1	77069.5	27961.3	32303.3	45362.2	108834	33657.6	31371.5	13080.1	21450.4	8938.74	27182.6	41047.1	55329.8	62515.6	149123	120320	19074.5	50711.9	49196.2	140693	82684.6
9.42_493.3164n	494.324	9.42435	pos	LysoPC(16:1(9Z)/0:0)	HMDB0010383	Lipids and lipid-like molecules	Glycerophospholipids	Glycerophosphocholines	M+H, M+Na	C24H48NO7P	54.9	81.5	-0.953286	4.41083	0.00095521	0.0350162	-1.14611	0.451841	280089	619883	409061	336008	303366	339015	296879	245245	226240	285043	77589.5	282441	529285	513899	536473	903390	918980	288420	353557	366146	833634	955050
10.65_465.3216n	466.329	10.6521	pos	PE(O-18:1(9Z)/0:0)	LMGP02060004	Lipids and lipid-like molecules	Glycerophospholipids	Glycerophosphoethanolamines	M+H, M+Na	C23H48NO6P	55.2	80.2	-0.604818	4.14066	0.0111791	0.0789045	-1.14759	0.451378	228179	505516	592647	190181	31845.9	436383	224238	195562	129053	283557	55022.3	143296	263919	439423	363290	700717	888210	210911	488846	337189	403557	959095
10.44_521.3477n	522.355	10.4389	pos	LysoPC(18:1(11Z))	HMDB0010385	Lipids and lipid-like molecules	Glycerophospholipids	Glycerophosphocholines	M+H, M+Na	C26H52NO7P	56.1	83.2	-0.866209	17.3315	0.000959655	0.0350162	-1.14947	0.450791	4.21436e+06	9.3488e+06	7.34121e+06	4.26051e+06	3.17102e+06	4.81312e+06	4.76266e+06	4.8251e+06	3.26698e+06	5.1456e+06	938131	3.61928e+06	6.97731e+06	9.14683e+06	7.72216e+06	1.07638e+07	1.26425e+07	5.00676e+06	6.36852e+06	6.04264e+06	1.14896e+07	1.7328e+07
11.11_548.2973m/z	548.297	11.1127	neg	6alpha-Glucuronosylhyodeoxycholate	LMST05010016	Lipids and lipid-like molecules	Sterol Lipids	Steroid conjugates	M-H2O-H	C30H47O10-	49.9	62.5	-3.19518	2.11989	0.00104544	0.0350281	-1.15444	0.44924	56120	124922	88189.8	38360.1	42870.5	58223.5	65143	64755.9	44174.7	85740.9	25893	47848.8	77876.4	140361	91513.3	201210	169042	80747.3	85682.7	76124.1	117800	208866
11.73_354.2763n	355.283	11.733	pos	2-Linoleoyl Glycerol	63032	Unclassified	Unclassified	Unclassified	M+H-H2O, M+H	C21H38O4	57.1	93.6	-1.97962	1.58534	0.00203383	0.0404945	-1.161	0.447204	41878.2	93644.5	64040.3	50668.3	36293.9	58290.8	40917.3	33978.9	23856.2	33437.9	29998.8	47299.5	136932	95327.7	54505.6	157929	135626	90570.3	35857.6	36325.6	120392	72979.6
9.74_477.2851n	478.292	9.74405	pos	LysoPE(18:2(9Z,12Z)/0:0)	HMDB0011507	Lipids and lipid-like molecules	Glycerophospholipids	Glycerophosphoethanolamines	M+H, M+Na	C23H44NO7P	55.1	82.9	-0.911435	2.39363	0.00568234	0.0581719	-1.16274	0.446664	103980	232793	139754	125265	176976	89805.8	89581.7	92276.6	58840.2	101030	42399.4	123873	177636	233227	165665	273996	288512	86399	102609	142796	462589	394501
15.50_429.3722m/z	429.372	15.4999	pos	26:2(5Z,9Z)(24Me)	LMFA01020360	Lipids and lipid-like molecules	Fatty Acyls	Fatty Acids and Conjugates	M+Na	C27H50O2	56	90	4.58049	1.57793	0.00256026	0.0427736	-1.1645	0.44612	34090.7	76416	42505.9	25058.3	28038.4	71642.9	39657.2	38406.8	22772.2	37744.3	17581.8	17499.2	51885.2	43000.6	69617.7	95730.6	110703	48984.8	53168.4	53045.5	87020	151004
1.12_617.1053m/z	617.105	1.12177	pos	Procyanidin B3	HMDB0033974	Phenylpropanoids and polyketides	Flavonoids	Biflavonoids and polyflavonoids	M+K	C30H26O12	35.3	0	-0.536418	1.52736	0.00265797	0.0432475	-1.16656	0.445481	86189.3	193475	109676	53809	7.93017e-07	170156	42807.3	187418	54305.6	10981.3	170254	62486.6	212122	278908	131026	71239.4	230763	199574	137171	301622	183192	189129
10.06_453.2856n	452.278	10.0595	neg	1-(2-methoxy-13-methyl-6Z-tetradecenyl)-sn-glycero-3-phosphoethanolamine	LMGP02060010	Lipids and lipid-like molecules	Glycerophospholipids	Glycerophosphoethanolamines	M-H, 2M-H	C21H44NO7P	46.8	35.2	0.22281	9.32782	0.00102746	0.0350162	-1.17172	0.443892	1.07774e+06	2.42794e+06	1.96459e+06	885548	525428	1.33237e+06	1.28578e+06	1.08451e+06	944632	1.60269e+06	365789	786068	1.64503e+06	2.16305e+06	2.18926e+06	3.71342e+06	3.4174e+06	1.50228e+06	1.58427e+06	1.32496e+06	2.78601e+06	3.95372e+06
9.83_356.3517m/z	356.352	9.82925	pos	cis-erucic acid	LMFA01030089	Lipids and lipid-like molecules	Fatty Acyls	Fatty Acids and Conjugates	M+NH4	C22H42O2	38.3	0	-1.84771	1.62301	0.00581288	0.0587796	-1.17726	0.442192	32547.6	73605.2	39969.8	27971.6	27381.8	53352.4	42396	26394.8	32114.4	29169	12404.4	34321.9	47749.7	63382.4	47755.5	111503	120479	48478.4	31121	33125.8	87656.9	144801
10.38_436.2833m/z	436.283	10.3759	neg	PE(P-16:0e/0:0)	HMDB0011152	Lipids and lipid-like molecules	Glycerophospholipids	Glycerophosphoethanolamines	M-H	C21H44NO6P	46.8	38.7	-0.120448	2.8419	0.00152625	0.038071	-1.18801	0.438908	114264	260337	162886	88044.3	226618	155007	121771	73066.2	62249.1	114974	59596.1	78428.1	177238	230795	191331	434194	327747	145996	182185	149954	339797	424132
11.08_597.3049m/z	597.305	11.0795	neg	PI(18:1(9Z)/0:0)	LMGP06050005	Lipids and lipid-like molecules	Glycerophospholipids	Glycerophosphoinositols	M-H	C27H51O12P	45.5	38.3	0.535542	4.54598	0.00109971	0.0357136	-1.18817	0.438859	257497	586742	470370	275640	15313.4	306355	309279	297338	252774	363541	77687	206673	365905	526233	540490	895324	744981	474783	506310	359611	405523	1.04826e+06
12.13_328.2396n	329.247	12.134	pos	DHA	LMFA01030185	Lipids and lipid-like molecules	Fatty Acyls	Fatty Acids and Conjugates	M+H-H2O, M+H	C22H32O2	54.8	79.2	-1.85929	7.96843	0.00512279	0.0558831	-1.19001	0.4383	873004	1.9918e+06	1.1292e+06	516998	1.39942e+06	1.34129e+06	856004	1.38748e+06	335982	792928	433188	537546	1.29137e+06	1.90827e+06	1.13099e+06	2.76433e+06	2.87568e+06	891833	1.70616e+06	1.52288e+06	1.54926e+06	4.27718e+06
12.68_328.3204m/z	328.32	12.678	pos	Stearoylethanolamide	3720	Organic nitrogen compounds	Organonitrogen compounds	Amines	M+H	C20H41NO2	54.7	81.3	-1.86453	1.2321	0.00219804	0.0412704	-1.1953	0.436697	23726.3	54331.3	39088.4	24508.9	36317.3	27441.4	26432.8	23155.8	12963.8	23360	11883.6	12111	28728.1	49716.7	56228	65199.8	72617.9	23447.3	35791.4	30736.9	79899.1	100948
10.44_526.3515m/z	526.352	10.4361	neg	PC(O-16:0/0:0)	LMGP01060010	Lipids and lipid-like molecules	Glycerophospholipids	Glycerophosphocholines	M+FA-H	C24H52NO6P	54.8	75	0.17296	2.59076	0.0127771	0.084091	-1.19595	0.436499	92281.1	211412	199247	87661.6	129179	132882	87225.7	43764.6	53166.6	97671.9	38550.9	53462.3	190691	150695	151024	525419	300414	106029	129292	105135	213677	241743
10.52_529.3165n	530.324	10.5237	pos	LysoPE(22:4(7Z,10Z,13Z,16Z)/0:0)	HMDB0011523	Lipids and lipid-like molecules	Glycerophospholipids	Glycerophosphoethanolamines	M+H, M+Na	C27H48NO7P	56.5	87.6	-0.713214	4.30546	0.00202199	0.0404246	-1.19841	0.435755	237106	544128	335860	237158	233375	340360	267290	219525	181474	265632	84816	205572	453533	471859	382522	737829	728010	290683	312704	371328	562184	1.13062e+06
9.76_612.3308m/z	612.331	9.7603	neg	PC(22:6(4Z,7Z,10Z,13Z,16Z,19Z)/0:0)	LMGP01050056	Lipids and lipid-like molecules	Glycerophospholipids	Glycerophosphocholines	M+FA-H	C30H50NO7P	56.4	82.8	0.21971	3.24308	0.00239237	0.0421478	-1.19905	0.435563	138194	317277	141716	75477.7	205767	158936	134598	219281	76106.2	202217	29683.5	138158	231534	344882	233976	475871	375525	245709	214697	222673	179961	647940
9.66_543.3319n	544.339	9.65928	pos	LysoPC(20:4(8Z,11Z,14Z,17Z))	HMDB0010396	Unclassified	Unclassified	Unclassified	M+H, M+Na, M+H-H2O	C28H50NO7P	58	93.8	-1.07459	13.4319	0.00495641	0.0550954	-1.19905	0.435561	2.07715e+06	4.76891e+06	2.28695e+06	1.34669e+06	1.22381e+06	3.42652e+06	2.6266e+06	2.52337e+06	1.38066e+06	3.17222e+06	720448	2.06422e+06	3.11343e+06	4.21291e+06	3.29539e+06	8.17717e+06	8.78057e+06	2.26644e+06	2.56817e+06	2.79816e+06	4.77761e+06	7.69921e+06
10.16_590.3465m/z	590.347	10.1649	neg	LysoPC(20:3(8Z,11Z,14Z))	HMDB0010394	Lipids and lipid-like molecules	Glycerophospholipids	Glycerophosphocholines	M+FA-H	C28H52NO7P	55	78.6	0.30654	1.79037	0.000681356	0.0343983	-1.20255	0.434505	40251.1	92636.7	54517.1	28933.4	46512.4	38799.1	39120.3	70026	25482.1	56567.3	6023.95	36529.8	83731.1	112059	69525.5	132275	120210	62979.7	46007.8	50174.4	96681	152723
10.74_548.3706m/z	548.371	10.7374	pos	LysoPC(20:2(11Z,14Z))	HMDB0010392	Lipids and lipid-like molecules	Glycerophospholipids	Glycerophosphocholines	M+H	C28H54NO7P	53.6	75.6	-0.915494	2.31657	0.00606922	0.059538	-1.2063	0.433378	80726.6	186273	114136	50782.8	191391	75460.2	75896	100965	33775.7	88567.1	18792.3	57500.4	119155	220231	162914	252096	290017	68595.3	90844.5	85927.7	223177	349773
10.42_566.3464m/z	566.346	10.4209	neg	PC(18:1(11Z)/0:0)	LMGP01050138	Lipids and lipid-like molecules	Glycerophospholipids	Glycerophosphocholines	M+FA-H	C26H52NO7P	55.7	79.2	0.206096	7.59433	0.000568995	0.0343983	-1.20666	0.43327	721083	1.66428e+06	1.27645e+06	737030	478283	796772	757014	784849	650699	958801	139747	631183	1.21837e+06	1.61469e+06	1.41458e+06	2.15232e+06	2.16131e+06	1.08266e+06	1.19782e+06	972836	1.74335e+06	3.0849e+06
12.09_404.2919n	405.299	12.0914	pos	MG(0:0/22:5(4Z,7Z,10Z,13Z,16Z)/0:0)	62338	Lipids and lipid-like molecules	Glycerolipids	Monoradylglycerols	M+H-H2O, M+H	C25H40O4	53.6	76.3	-1.85569	2.27034	0.0279684	0.128109	-1.20958	0.432395	62963.9	145617	71391.8	56963.7	7283.62	176278	85615.9	74680.3	51303.9	68689.3	5271.82	32159.8	84247.6	126988	155586	236525	287838	63068.7	51866.3	70647.7	70039.4	309359
10.08_453.2850n	454.292	10.084	pos	PE(16:0/0:0)	40776	Unclassified	Unclassified	Unclassified	M+H, 2M+Na, 2M+H, M+Na, M+H-H2O	C21H44NO7P	59.2	98.1	-1.17279	16.7264	0.00108717	0.0357052	-1.21933	0.429481	3.35428e+06	7.81009e+06	5.75638e+06	2.63445e+06	1.77321e+06	4.46758e+06	4.26292e+06	3.69848e+06	2.75908e+06	4.57968e+06	1.12972e+06	2.48134e+06	4.97296e+06	7.06748e+06	7.1128e+06	1.17487e+07	1.12436e+07	3.86517e+06	5.00332e+06	4.51228e+06	9.70336e+06	1.28712e+07
9.62_472.3419m/z	472.342	9.61683	pos	Cervonyl carnitine	HMDB0006510	Lipids and lipid-like molecules	Fatty Acyls	Fatty acid esters	M+H	C29H45NO4	38.6	0	-0.518489	1.61942	0.0439921	0.166538	-1.23462	0.424955	35973.4	84652.3	35146	17197.2	20097.6	89920.6	25441.7	61514.6	9634.92	45803.6	875.647	54102.5	36191.4	95006.9	56088.1	59719.6	131416	47008.1	44639.4	46487.2	77313.3	252652
10.20_504.3081m/z	504.308	10.198	pos	PE(18:0/0:0)	LMGP02050001	Lipids and lipid-like molecules	Glycerophospholipids	Glycerophosphoethanolamines	M+Na	C23H48NO7P	56.2	87.9	4.15118	4.00051	0.00025455	0.0273714	-1.23684	0.424301	196521	463164	283091	184978	50672.1	297214	239035	300794	146897	247307	58841.7	156378	379089	559360	410869	554025	607816	285957	254918	298911	538914	741779
9.71_524.2783m/z	524.278	9.71383	neg	PE(22:6(4Z,7Z,10Z,13Z,16Z,19Z)/0:0)	LMGP02050013	Lipids and lipid-like molecules	Glycerophospholipids	Glycerophosphoethanolamines	M-H	C27H44NO7P	50.8	59.9	0.0688249	4.80202	0.000609803	0.0343983	-1.24635	0.421514	271827	644883	373761	242777	207598	366728	254989	330329	205490	334391	87092	315116	519726	620183	454153	916587	736485	457146	428063	477528	558151	1.28081e+06
9.97_504.3081m/z	504.308	9.97058	pos	LysoPE(0:0/20:3(11Z,14Z,17Z))	HMDB0011484	Lipids and lipid-like molecules	Glycerophospholipids	Glycerophosphoethanolamines	M+H	C25H46NO7P	55.3	79.9	-0.789427	4.79902	0.000451433	0.033089	-1.26225	0.416893	271212	650554	414873	254757	83383	411144	341273	330065	212477	334007	106712	223425	469470	706056	539618	808601	991894	363982	355872	415556	828741	1.02575e+06
9.95_502.2943m/z	502.294	9.94557	neg	PE(0:0/20:3(8Z,11Z,14Z))	LMGP02050050	Lipids and lipid-like molecules	Glycerophospholipids	Glycerophosphoethanolamines	M-H	C25H46NO7P	53	69.6	0.689376	2.70006	0.00041196	0.0323267	-1.27359	0.41363	86196.2	208390	134205	78137.1	38590.8	112961	92920.3	97268.2	65845.8	97966.8	69894.3	74171.5	157572	227086	173489	267086	306369	130554	104457	111120	258040	348121
10.38_389.3044m/z	389.304	10.3821	pos	Methyl 2-(10-heptadecenyl)-6-hydroxybenzoate	HMDB0038523	Benzenoids	Benzene and substituted derivatives	Benzoic acids and derivatives	M+H	C25H40O3	37.9	0	-1.64686	1.1588	0.00024588	0.0273714	-1.27975	0.411868	15104.3	36672.8	21302	16031.7	7230.42	32223.5	19437.2	12704.5	11125.2	15915.6	5168.6	9904.73	30811.6	28231.1	27224.5	49188.4	50948.1	29564.1	23085.9	25707.9	42695.3	59270.9
10.19_502.2941m/z	502.294	10.1948	neg	LysoPE(0:0/20:3(5Z,8Z,11Z))	HMDB0011485	Lipids and lipid-like molecules	Glycerophospholipids	Glycerophosphoethanolamines	M-H	C25H46NO7P	53.2	71.2	0.396655	2.3085	0.000182968	0.0269668	-1.28183	0.411273	62092.8	150977	96126.8	58950.8	19784.5	84571.2	73714.7	86742.3	45318.8	71808.4	30670.6	53239.8	112227	181469	127285	180001	206965	113221	83937.4	83104.5	178778	242783
11.51_467.3373n	468.345	11.5054	pos	PE(O-18:0/0:0)	LMGP02060003	Lipids and lipid-like molecules	Glycerophospholipids	Glycerophosphoethanolamines	M+H, M+Na	C23H50NO6P	54.7	78.9	-0.491442	2.99819	0.00444462	0.0526923	-1.29218	0.408333	96946.5	237420	247647	62946.2	45559.6	150735	78574.4	85403.7	65039.8	127524	41331.3	64703.6	137344	202238	148600	400190	398983	90453.6	190999	160038	232806	412552
10.56_616.3621m/z	616.362	10.5592	neg	LysoPC(22:4(7Z,10Z,13Z,16Z))	HMDB0010401	Lipids and lipid-like molecules	Glycerophospholipids	Glycerophosphocholines	M+FA-H	C30H54NO7P	53.8	73.2	0.151144	1.39364	0.00471876	0.053709	-1.30457	0.404842	22284.4	55044.7	26403.8	15499.5	32241.3	30176	22611.2	30302.3	10460.5	31130.6	3905.84	20113.3	39959.9	57126.1	37060.8	78990.7	72088	37665.3	36710.7	30915.6	32173	127757
11.66_300.2892m/z	300.289	11.662	pos	Palmitoyl Ethanolamide	43210	Unclassified	Unclassified	Unclassified	M+H	C18H37NO2	55.3	82.4	-1.71795	1.62418	0.00125727	0.0361887	-1.30538	0.404614	31110.2	76888.7	54576.7	26049.9	35680.4	51603.6	32032.2	26122.2	16086.6	31750.6	13493.3	23706.6	52465	65099.1	58420.2	106628	92546.2	38108.3	51271.3	47136.9	109931	147282
10.36_438.2991m/z	438.299	10.3612	neg	PE(O-16:0/0:0)	LMGP02060002	Lipids and lipid-like molecules	Glycerophospholipids	Glycerophosphoethanolamines	M-H	C21H46NO6P	53.3	69.1	0.305479	3.00963	0.00771661	0.0663468	-1.31088	0.403075	101394	251552	251218	79891.6	46537	150405	87037.1	67538.4	86832.5	121970	52246.6	70267.3	260037	175590	127405	593721	382730	117039	184818	137712	253149	283317
10.45_502.3886m/z	502.389	10.453	pos	3b,18b-3-Methoxy-11-oxo-12-oleanen-30-oic acid	HMDB0034516	Lipids and lipid-like molecules	Prenol lipids	Triterpenoids	M+NH4	C31H48O4	38.5	0	-0.981559	1.71352	0.035967	0.148086	-1.31511	0.401896	32636	81205.2	45239.8	14200.1	7.93017e-07	107953	31644.7	47374.7	4609.71	47341.9	7.93017e-07	27996.3	38713.2	108843	42586	74863.9	139596	27727.9	40111.8	42265.8	81220.3	216125
10.59_506.3238m/z	506.324	10.5948	pos	LysoPE(20:2(11Z,14Z)/0:0)	HMDB0011513	Lipids and lipid-like molecules	Glycerophospholipids	Glycerophosphoethanolamines	M+H	C25H48NO7P	38	0	-0.693634	2.59228	0.00115489	0.0357706	-1.31702	0.401362	73597.8	183370	126890	81377.8	21937.5	109243	100317	98487.6	61049.9	76352	13187.5	47136.4	146615	197388	168302	257274	277322	98285.5	98619.7	101613	155666	332616
11.14_481.3164n	482.324	11.1359	pos	LysoPE(0:0/18:0)	HMDB0011129	Lipids and lipid-like molecules	Glycerophospholipids	Glycerophosphoethanolamines	M+H, M+Na, 2M+Na, 2M+H, M+H-H2O	C23H48NO7P	52.9	67	-1.00579	16.3417	0.000907343	0.0348894	-1.31811	0.401059	2.96135e+06	7.38384e+06	4.74829e+06	2.01627e+06	3.22974e+06	3.3122e+06	3.27497e+06	3.22994e+06	1.91203e+06	4.3179e+06	1.40903e+06	2.16316e+06	4.38036e+06	7.32271e+06	6.13215e+06	1.13474e+07	1.15576e+07	3.25391e+06	4.58632e+06	4.26833e+06	9.10842e+06	1.18811e+07
8.75_302.3049m/z	302.305	8.74873	pos	Safingol ( L-threo-sphinganine)	LMSP01080055	Lipids and lipid-like molecules	Sphingolipids	Sphingoid bases	M+H	C18H39NO2	49.3	51.5	-1.46001	3.53248	0.00345129	0.0480092	-1.31828	0.401013	129271	322362	149913	98786.8	103953	194129	157328	108740	127217	149531	78125.3	124988	224700	240850	181704	543710	587967	215331	137823	155193	383138	553200
11.11_481.3169n	480.31	11.1127	neg	1-(2-methoxy-6Z-heptadecenyl)-sn-glycero-3-phosphoethanolamine	LMGP02060019	Lipids and lipid-like molecules	Glycerophospholipids	Glycerophosphoethanolamines	M-H, 2M-H	C23H48NO7P	50.7	54.9	0.132758	8.16884	0.00111689	0.0357706	-1.32107	0.400237	695998	1.73896e+06	1.16266e+06	495513	576710	720991	770933	751062	528587	1.06351e+06	349441	540567	999706	1.74574e+06	1.27839e+06	2.83747e+06	2.62407e+06	971795	1.10217e+06	944272	1.9067e+06	2.97932e+06
9.57_477.2851n	478.292	9.57457	pos	LysoPE(0:0/18:2(9Z,12Z))	HMDB0011477	Lipids and lipid-like molecules	Glycerophospholipids	Glycerophosphoethanolamines	M+H, M+Na	C23H44NO7P	55.6	85.1	-0.922299	3.23732	0.00233878	0.0419866	-1.32229	0.399901	136056	340225	178371	164351	97081.5	193015	157837	124380	104385	134462	69886.5	136795	230818	291328	223590	418344	518624	149820	156370	232160	671233	509965
11.46_465.3215n	466.329	11.4627	pos	PE(P-18:0/0:0)	LMGP02070002	Lipids and lipid-like molecules	Glycerophospholipids	Glycerophosphoethanolamines	M+H, M+Na	C23H48NO6P	48	46.9	-0.874543	2.77737	0.00447281	0.0526923	-1.323	0.399704	102842	257295	135022	67803.1	243265	139465	92803.3	77922.9	47138.2	87403.3	59927.8	77664.7	143333	218722	219326	387258	369398	79167.2	131105	148755	395043	480840
9.31_541.3163n	542.324	9.30627	pos	LysoPC(20:5(5Z,8Z,11Z,14Z,17Z))	HMDB0010397	Lipids and lipid-like molecules	Glycerophospholipids	Glycerophosphocholines	M+H, M+Na	C28H48NO7P	54.6	80.8	-0.993997	1.5995	0.000361247	0.0305217	-1.32518	0.399099	30659.4	76821.5	41947.4	29446.5	12845.2	27096.7	40994.7	53627.4	18130.7	36075.9	8978.53	37450.8	76796.5	92693.5	56849.7	90891.6	127623	40199	54274.1	56300.5	52217.8	120369
11.68_378.2764n	379.284	11.6762	pos	MG(0:0/20:4(5Z,8Z,11Z,14Z)/0:0)	43423	Unclassified	Unclassified	Unclassified	M+H-H2O, M+H	C23H38O4	53.3	73.9	-1.66324	1.96881	0.0075943	0.0656859	-1.32844	0.3982	40525	101771	52101.5	29498.6	26278.4	81927.1	50804	48186.1	23962.5	46012	9288.01	37191.8	81265.3	92021.6	85616.6	184821	204705	41653.3	32712.4	48750.3	82011.3	164149
9.84_474.3574m/z	474.357	9.84347	pos	23-Acetoxysoladulcidine	HMDB0031402	Lipids and lipid-like molecules	Steroids and steroid derivatives	Steroidal alkaloids	M+H	C29H47NO4	47.7	45.5	-0.919064	1.74914	0.0368671	0.150258	-1.33289	0.396971	36391.2	91672.2	50317.7	18383.6	7091.97	75413.3	27587.5	72470.1	12571.4	48238.5	6129.57	45708.6	37161.5	107318	60281.6	63765.1	162321	40483	38721.8	40784.2	100841	265045
9.69_286.3100m/z	286.31	9.68753	pos	Oleyl alcohol	LMFA05000684	Lipids and lipid-like molecules	Fatty Acyls	Fatty alcohols	M+NH4	C18H36O	56.8	89.5	-1.71973	2.03932	0.00657804	0.061186	-1.33852	0.395427	48200.7	121895	68662.3	32436.5	103309	88092.9	48311.9	24987.3	24099.5	31959.9	35224.7	24923.4	99650.5	87011.2	61138.7	264272	191981	59960.3	66808.3	64332.7	146839	176960
11.80_524.2993m/z	524.299	11.8025	neg	L-a-Lysophosphatidylserine	34531	Unclassified	Unclassified	Unclassified	M-H	C24H48NO9P	57.4	95.2	-0.185541	2.37513	0.000749532	0.0343983	-1.34246	0.394348	70725.3	179347	97850.7	73893.3	34635.2	84881.2	68626.5	60239.6	57666.7	79629.7	68240.7	81589.2	68976.1	169849	122529	231799	211143	93591.6	141273	141273	313803	299237
10.36_479.3012n	478.294	10.3612	neg	PE(18:1(9Z)/0:0)	40778	Unclassified	Unclassified	Unclassified	M-H, 2M-H	C23H46NO7P	58.7	95.1	0.0238286	8.0448	0.000603914	0.0343983	-1.34463	0.393756	675508	1.71555e+06	1.27862e+06	729561	172579	761976	802227	733163	585911	926913	186436	577697	1.18918e+06	1.62338e+06	1.46298e+06	2.38392e+06	2.33203e+06	1.07597e+06	1.102e+06	887228	1.97814e+06	3.12069e+06
10.65_622.3337m/z	622.334	10.6519	neg	PS(22:2(13Z,16Z)/0:0)	LMGP03050024	Lipids and lipid-like molecules	Glycerophospholipids	Glycerophosphoserines	M+FA-H	C28H52NO9P	37.7	2.98	-4.20955	1.67495	0.000609919	0.0343983	-1.34484	0.393696	29040.6	73764	45999.9	29149.1	29836.8	45908.9	28700.4	21880.6	19709.5	29860.8	7415.54	31944.8	49316.4	87124.4	44003.7	108978	100702	61731.9	44308.2	34986.1	76654.5	129836
10.24_566.3464m/z	566.346	10.2391	neg	2-oleoyl-sn-glycero-3-phosphocholine	HMDB0062651	Lipids and lipid-like molecules	Glycerophospholipids	Glycerophosphocholines	M+FA-H	C26H52NO7P	55.7	79	0.113805	6.96157	0.00182075	0.0388929	-1.34495	0.393668	478691	1.21598e+06	845122	503271	77506	693372	587140	542307	427996	630977	83612.6	395602	932822	1.21981e+06	937996	1.95058e+06	1.97189e+06	666986	616755	588731	1.16631e+06	2.10788e+06
17.48_599.3205m/z	599.321	17.4759	neg	2-Stearoylglycerophosphoinositol	HMDB0061704	Lipids and lipid-like molecules	Glycerophospholipids	Glycerophosphoinositols	M-H	C27H53O12P	48.7	47.8	0.570829	4.81833	0.00876856	0.0703676	-1.35072	0.392097	234509	598089	302820	163078	49166.5	263153	383010	228459	225844	454868	117294	157398	187334	371926	420120	1.02248e+06	1.24649e+06	376878	491288	303631	483561	1.07719e+06
9.65_567.3320n	568.339	9.64508	pos	LysoPC(22:6(4Z,7Z,10Z,13Z,16Z,19Z))	HMDB0010404	Lipids and lipid-like molecules	Glycerophospholipids	Glycerophosphocholines	M+H, M+Na	C30H50NO7P	57.9	92.5	-0.938733	6.18808	0.00649454	0.0608513	-1.35407	0.391187	377241	964351	377651	211412	312619	694621	483048	504439	234144	513176	91989.7	349312	617370	882669	740148	1.86448e+06	1.79405e+06	404244	413766	519766	761723	1.64529e+06
11.76_302.2242n	303.231	11.7613	pos	Eicosapentaenoic acid	HMDB0001999	Lipids and lipid-like molecules	Fatty Acyls	Fatty acids and conjugates	M+H-H2O, M+H	C20H30O2	55	80.8	-1.39786	2.0873	0.000353069	0.0303115	-1.3558	0.390718	62306.5	159466	86016.9	68325.2	113144	72604.1	53158	62623.5	30882.1	46290.5	52912.7	37107.6	166777	140192	155396	160837	235466	90427.9	113711	110856	115395	305607
11.32_581.3072m/z	581.307	11.3206	pos	Oxamniquine	HMDB0015228	Organoheterocyclic compounds	Quinolines and derivatives	Nitroquinolines and derivatives	2M+Na	C14H21N3O3	39	0	2.50881	2.03721	0.00391655	0.0502625	-1.36928	0.387083	44635.8	115313	95485.3	36441	103.511	71874.3	39120.9	64599.8	35790	76518	318.932	26106.3	66674.2	88874.9	142310	204370	125240	49375.5	87545.5	85214.7	76318.2	227209
12.80_355.1581m/z	355.158	12.7964	neg	Hydroxyzine	HMDB0014697	Benzenoids	Benzene and substituted derivatives	Diphenylmethanes	M-H2O-H	C21H27ClN2O2	37.3	13.4	-0.464417	1.98732	1.72113e-05	0.0129333	-1.37206	0.38634	44786	115924	88561.2	53484.4	25757.5	51230.4	35150.1	56041.7	40264.9	42416.8	13275.9	41677.3	93989	148694	82066.7	138491	136843	85216.9	75940.7	92282.3	137960	167754
11.68_402.2766n	403.284	11.6762	pos	MG(22:6(4Z,7Z,10Z,13Z,16Z,19Z)/0:0/0:0)	62369	Lipids and lipid-like molecules	Glycerolipids	Monoradylglycerols	M+H-H2O, M+H	C25H38O4	51.9	66.2	-0.979912	1.95229	0.0254894	0.122245	-1.37496	0.385564	44664.4	115842	39777.1	20715	113655	79186.9	48653.5	49263.9	21896.7	31558.6	13570.8	28366.8	71592.6	79209.2	79716.4	187020	177035	62886.6	58166.4	58997.8	61499.5	322294
10.54_571.2888m/z	571.289	10.5437	neg	1-hexadecanoyl-sn--glycero-3-phospho-D-myo-inositol	LMGP02060006	Lipids and lipid-like molecules	Glycerophospholipids	Glycerophosphoinositols	M-H	C25H49O12P	49.6	50.2	-0.112821	8.47014	0.00283096	0.0443893	-1.37524	0.385488	714429	1.85331e+06	1.22943e+06	645764	122870	899493	919453	699245	690219	1.01489e+06	350226	572702	1.47845e+06	1.40807e+06	1.39064e+06	4.29804e+06	2.38153e+06	1.20529e+06	1.29646e+06	1.04219e+06	1.47086e+06	2.56154e+06
8.53_315.2769n	298.274	8.53218	pos	4-hydroxy-8cis-sphingenine	LMSP01080009	Lipids and lipid-like molecules	Sphingolipids	Sphingoid bases	M+H-H2O, M+H	C18H37NO3	38.8	0	-1.3123	1.94742	0.00112479	0.0357706	-1.38165	0.38378	40806	106327	50210.8	37946.2	30392.1	79955.4	40207.2	40493.8	21988.4	40060.5	14516.7	52289	59148.1	95884.9	92789.9	135713	155587	48413.7	67927	67107	134821	205875
11.43_549.3789n	550.386	11.4342	pos	LysoPC(20:1(11Z))	HMDB0010391	Lipids and lipid-like molecules	Glycerophospholipids	Glycerophosphocholines	M+H, M+Na	C28H56NO7P	57.4	92.1	-1.00745	3.83892	0.00180244	0.0388929	-1.38203	0.383678	163024	424898	254740	124589	167053	161533	196150	221442	97410.8	253777	33565.2	119980	250126	502396	411163	514539	665436	158248	223455	200095	522445	801082
9.60_385.2731m/z	385.273	9.6028	pos	24-Nor-5beta-chol-22-ene-3alpha,7alpha,12alpha-triol	LMST04060012	Lipids and lipid-like molecules	Sterol Lipids	Bile acids and derivatives	M+Na	C23H38O3	52.8	74.2	4.81747	1.61553	0.00012492	0.0257901	-1.3842	0.383101	26481.6	69124.4	34938.4	19922.8	17678.2	57484.2	29653.9	22256.2	17807.9	26452.1	11092.6	27529.8	51492.6	52448.9	53046.8	106766	92639	46648.5	44551.6	58829.4	79991.3	104830
17.49_524.2988m/z	524.299	17.4904	neg	LysoPE(18:1(9Z)/0:0)	HMDB0011506	Lipids and lipid-like molecules	Glycerophospholipids	Glycerophosphoethanolamines	M+FA-H	C23H46NO7P	37.1	0	-1.19439	1.00083	0.000977075	0.0350162	-1.38495	0.382903	14809.1	38675.8	37242.4	17438	6940.3	19132.9	11186.5	7138.24	11926.1	16257.4	9061.84	11767.2	30667	46816.6	37355	43240.4	41625.1	11786.8	24000.9	27909	74448	48909
9.26_499.2693n	500.277	9.2635	pos	LysoPE(0:0/20:5(5Z,8Z,11Z,14Z,17Z))	HMDB0011489	Lipids and lipid-like molecules	Glycerophospholipids	Glycerophosphoethanolamines	M+H, M+Na	C25H42NO7P	55.2	83.1	-1.10182	1.57709	0.00056933	0.0343983	-1.38697	0.382367	28648.7	74924.6	43514.7	32600.6	3267.33	27814.7	37106.4	47955.7	15431.3	31861.1	9235.73	37699.8	62789.8	90878.7	60324.2	71122.9	105270	38453.4	43165	54229.8	79139.6	143873
11.18_456.4041m/z	456.404	11.1785	pos	Arachidyl carnitine	HMDB0006460	Lipids and lipid-like molecules	Fatty Acyls	Fatty acid esters	M+H	C27H53NO4	38.2	0	-1.42525	1.9302	0.015839	0.0939721	-1.39017	0.381521	36803.3	96464.8	39070.4	43941.8	13240	107101	20869.8	50284.9	29740.8	19261.5	2308.48	42214.8	56077.6	69178.6	79904.8	246872	123777	44043.7	50506.9	46842.4	86482	160963
10.17_569.3474n	570.355	10.1695	pos	LysoPC(22:5(4Z,7Z,10Z,13Z,16Z))	HMDB0010402	Unclassified	Unclassified	Unclassified	M+H, M+Na	C30H52NO7P	57.9	93.5	-1.2837	9.62927	0.00707147	0.0634749	-1.39118	0.381253	863927	2.26602e+06	1.05382e+06	601544	165588	1.79021e+06	1.1817e+06	1.27257e+06	519872	1.20353e+06	105858	744587	1.70117e+06	2.32841e+06	1.64432e+06	4.90453e+06	4.02695e+06	1.0645e+06	1.06965e+06	1.23195e+06	1.37042e+06	3.31828e+06
10.15_614.3464m/z	614.346	10.1497	neg	PC(22:5(7Z,10Z,13Z,16Z,19Z)/0:0)	LMGP01050143	Lipids and lipid-like molecules	Glycerophospholipids	Glycerophosphocholines	M+FA-H	C30H52NO7P	56	81.8	0.0967113	3.70989	0.00989977	0.0743682	-1.39709	0.379694	126963	334382	164299	79402.3	17365.4	257719	185359	176160	72625	200747	10749	105206	263388	347095	235446	780279	581599	180910	153404	163892	170470	467340
10.65_554.3462m/z	554.346	10.6519	neg	LysoPC(17:0)	HMDB0012108	Lipids and lipid-like molecules	Glycerophospholipids	Glycerophosphocholines	M+FA-H	C25H52NO7P	54.6	74.5	-0.316319	6.04381	0.000620223	0.0343983	-1.39959	0.379036	355414	937678	582176	343683	403287	559442	340421	246853	256783	383086	99306.5	339098	648009	992238	575202	1.42578e+06	1.32038e+06	714769	524830	444905	1.07552e+06	1.65515e+06
12.15_512.5031m/z	512.503	12.1483	pos	Cer(d18:0/14:0)	HMDB0011759	Lipids and lipid-like molecules	Sphingolipids	Ceramides	M+H	C32H65NO3	37.5	0	-1.13209	1.33985	0.0190398	0.103179	-1.40005	0.378917	18538.9	48926	23132.2	19992.2	35132.5	35221.5	9516.88	19786.6	12960.3	8100.8	8946.35	12599.4	31933.6	46077.2	32632.2	104749	81615.4	13342.3	14041.4	19259.3	38549.5	107060
11.05_574.3861m/z	574.386	11.0501	pos	LysoPC(20:0/0:0)	HMDB0010390	Lipids and lipid-like molecules	Glycerophospholipids	Glycerophosphocholines	M+Na	C28H58NO7P	37.8	0	3.20259	1.25778	0.00605417	0.059538	-1.40285	0.378181	14911	39428.2	22742.9	9945.22	2419.84	34163.1	17141.2	25647.6	10230.3	15311.4	7.93017e-07	11508.3	22456.7	41498.5	39579.5	72533.6	55474	15626.2	12348.7	20429.7	38854.1	75480.6
9.60_527.2611m/z	527.261	9.6028	pos	PI(14:0/0:0)	LMGP06050008	Lipids and lipid-like molecules	Glycerophospholipids	Glycerophosphoinositols	M+H-H2O	C23H45O12P	39.4	0	-0.915251	1.14725	0.0151584	0.0920286	-1.40356	0.377995	29833.2	78924.9	46042.5	25785	7.93017e-07	42613.3	32791.9	33063.6	9452.72	13088.3	46090.5	49404.5	81269	172393	55363.4	14494.9	59283.5	47597	42185.6	79875.4	54625	182163
10.37_504.3084m/z	504.308	10.368	pos	LysoSM(d18:1)	HMDB0006482	Lipids and lipid-like molecules	Sphingolipids	Phosphosphingolipids	M+K	C23H50N2O5P+	39.1	0	-1.0391	2.10501	0.000804271	0.0343983	-1.40947	0.37645	47112.6	125150	73643.3	38074.4	2277.92	60496.9	57508.4	102191	32214	58531.8	4959.23	41229	100977	170425	107148	137404	150313	68928.5	63225.6	75118.9	142849	235109
9.60_600.2037m/z	600.204	9.60382	neg	2-amino-4-({1-[(carboxymethyl)-C-hydroxycarbonimidoyl]-2-[(2-{3,5-dihydroxy-4-[(1E)-3-methylbut-1-en-1-yl]phenyl}-2-hydroxy-1-(4-hydroxyphenyl)ethyl)sulfanyl]ethyl}-C-hydroxycarbonimidoyl)butanoic acid	HMDB0129016	Organic acids and derivatives	Carboxylic acids and derivatives	Amino acids, peptides, and analogues	M-H2O-H	C29H37N3O10S	44.4	32.5	2.58454	1.7871	0.000177946	0.0269668	-1.43027	0.371061	33764.5	90994.5	51891.3	29739	20811.5	64855.3	38360.1	32528.1	19905.1	37362.2	13392.5	28799.5	63539.9	77195.2	72182.2	108740	133770	58768.1	56498	62344.6	148292	128615
10.41_545.3484n	546.356	10.4105	pos	PC(20:3(5Z,8Z,11Z)/0:0)	LMGP01050139	Lipids and lipid-like molecules	Glycerophospholipids	Glycerophosphocholines	M+H, M+Na	C28H52NO7P	39	0	0.493193	2.31257	0.000522491	0.0341926	-1.43134	0.370786	54112.8	145941	83933.2	36998.3	7915.82	61672.8	70678.5	130738	28922.4	70928	5821.9	43518.6	115413	200707	118291	168774	197645	101971	76277.7	93637.7	130250	256443
1.48_483.0684m/z	483.068	1.47965	neg	7-chloro-2-(1-hydroxy-3-methoxy-4-oxocyclohexa-2,5-dien-1-yl)-3,5,6,8-tetramethoxy-4H-chromen-4-one	HMDB0135841	Organoheterocyclic compounds	Benzopyrans	1-benzopyrans	M+FA-H	C20H19ClO9	35	3.78	-3.57445	1.06729	0.000401856	0.0318218	-1.43185	0.370655	22611.8	61005	35479.1	16813.5	7.93017e-07	26586	27611.9	24729.5	19466.3	19818.5	31983.8	23629.2	50610	36277.1	34911.1	37594.7	39136.4	55716.9	96060	70127.2	103637	85979.1
7.92_317.2925n	318.3	7.91538	pos	Phytosphingosine	7066	Organic nitrogen compounds	Organonitrogen compounds	Amines	M+H, M+Na	C18H39NO3	43.5	23.1	-1.58021	4.26226	0.003906	0.0502625	-1.43336	0.370268	178488	482050	167490	176380	161829	236063	223405	113776	207679	211967	153957	132332	389095	392526	264169	871619	1.01027e+06	262887	202520	232611	468834	725968
10.25_527.3005n	528.308	10.2547	pos	LysoPE(22:5(7Z,10Z,13Z,16Z,19Z)/0:0)	HMDB0011525	Lipids and lipid-like molecules	Glycerophospholipids	Glycerophosphoethanolamines	M+H, M+Na	C27H46NO7P	57.1	89.3	-1.30463	10.8016	0.00159057	0.038435	-1.43564	0.369683	1.06176e+06	2.87209e+06	1.56437e+06	828030	199313	1.98659e+06	1.2894e+06	1.43275e+06	714703	1.33113e+06	247113	1.02422e+06	2.13022e+06	2.88814e+06	1.62343e+06	4.37223e+06	3.74193e+06	1.75361e+06	2.04047e+06	2.12581e+06	2.00098e+06	6.04406e+06
10.55_548.3705m/z	548.371	10.5521	pos	PC(16:0/4:0)	LMGP01010669	Lipids and lipid-like molecules	Glycerophospholipids	Glycerophosphocholines	M+H-H2O	C28H56NO8P	38.4	0	-0.96409	1.73779	0.00226374	0.0413462	-1.43857	0.368933	29392.6	79669.3	49453.8	26570	17483.6	38365.4	34031.4	45749.1	19506.3	39273.1	1511.21	21982.3	52706.8	99438.6	71578.6	115018	142022	30493.8	25883.8	41505.9	84100.1	133946
10.65_464.3131m/z	464.313	10.6521	pos	LysoPE(18:0/0:0)	HMDB0011130	Lipids and lipid-like molecules	Glycerophospholipids	Glycerophosphoethanolamines	M+H-H2O	C23H48NO7P	49.4	52.6	-0.917374	3.96013	0.000707953	0.0343983	-1.44042	0.368459	161431	438124	227011	118036	222746	244176	200317	173876	81531.8	176673	51798.1	118141	248631	422788	351772	575362	584224	201897	316478	254273	577946	847867
9.38_451.2694n	452.277	9.37957	pos	LysoPE(16:1(9Z)/0:0)	HMDB0011504	Lipids and lipid-like molecules	Glycerophospholipids	Glycerophosphoethanolamines	M+H, M+Na	C21H42NO7P	54.5	78.5	-0.986796	3.03158	0.0010104	0.0350162	-1.44296	0.367812	88111.5	239556	162472	115345	21750.4	112402	100838	87050.9	84049.2	100197	19271	77740.1	196081	180948	192156	404052	394760	119861	117916	125518	324651	339617
10.30_569.3475n	570.355	10.2972	pos	LysoPC(22:5(7Z,10Z,13Z,16Z,19Z))	HMDB0010403	Lipids and lipid-like molecules	Glycerophospholipids	Glycerophosphocholines	M+H, M+Na	C30H52NO7P	57.5	90.2	-1.13246	10.3977	0.000998683	0.0350162	-1.45007	0.366003	956415	2.61314e+06	1.36758e+06	728081	150643	1.66125e+06	1.17569e+06	1.50418e+06	579372	1.32303e+06	129282	945037	2.02795e+06	2.58112e+06	1.66706e+06	4.47542e+06	3.38313e+06	1.49528e+06	1.94193e+06	1.96903e+06	1.70837e+06	4.88205e+06
12.61_330.2553n	331.263	12.6066	pos	22:5(4Z,7Z,10Z,13Z,16Z)	LMFA04000064	Lipids and lipid-like molecules	Fatty Acyls	Docosanoids	M+H-H2O, M+H	C22H34O2	53.1	71.4	-1.77354	3.85981	0.00181318	0.0388929	-1.45037	0.365928	134766	368285	218342	111430	58977.2	267098	185320	157535	50756.3	184847	44191.6	69161	221819	409255	234764	639524	519348	165882	296376	265467	243069	687341
9.62_519.3321n	520.339	9.61683	pos	PC(18:2(9Z,12Z)/0:0)	LMGP01050035	Lipids and lipid-like molecules	Glycerophospholipids	Glycerophosphocholines	M+H, M+Na	C26H50NO7P	54.4	77.2	-0.832925	4.3432	0.00800992	0.067628	-1.45229	0.36544	225826	617954	270594	164296	462423	272832	206166	202118	100529	254321	106677	218299	389806	548424	386672	919177	1.00178e+06	182511	176745	305775	1.35592e+06	912736
9.19_451.2695n	452.277	9.18723	pos	LysoPE(0:0/16:1(9Z))	HMDB0011474	Lipids and lipid-like molecules	Glycerophospholipids	Glycerophosphoethanolamines	M+H, M+Na, M+NH4	C21H42NO7P	56.3	88.4	-0.961885	1.93097	0.000298017	0.0291629	-1.45856	0.363855	34269.6	94184.6	52319.3	43051.6	9563.06	64797.1	41057.5	27623.8	29799.6	32159.8	11558.3	30765.5	72576.5	70057.8	64391.9	155786	138038	61501.5	60641.5	60188.7	121266	137398
10.38_314.3411m/z	314.341	10.3821	pos	Phytol	HMDB0002019	Lipids and lipid-like molecules	Prenol lipids	Diterpenoids	M+NH4	C20H40O	38.4	0	-2.11413	1.604	0.00477556	0.0541293	-1.46262	0.362832	29503.6	81314.6	44572.7	26637.4	47767.1	45283.1	22021.7	23817.5	19133.5	21728.7	12040.8	32033.4	31625.2	57749.4	40722.6	98028.5	88825.3	50144.9	55807.9	57314.4	155383	177545
10.57_504.3099m/z	504.31	10.5746	neg	LysoPE(0:0/20:2(11Z,14Z))	HMDB0011483	Lipids and lipid-like molecules	Glycerophospholipids	Glycerophosphoethanolamines	M-H	C25H48NO7P	37.9	0	0.696872	1.41043	0.000615988	0.0343983	-1.46825	0.361422	18871	52213.3	32510.7	19574.5	6635.93	23329.3	24422.9	26590.1	13544.3	16291.9	11355.7	14454.9	33657.8	56703.2	44235.8	71343.3	73177.8	35144.9	25605.1	23199.9	60628.8	98436.7
11.95_509.2884m/z	509.288	11.9543	neg	1-(11Z-eicosenoyl)-glycero-3-phosphate	HMDB0062305	Lipids and lipid-like molecules	Glycerophospholipids	Glycerophosphates	M+FA-H	C23H45O7P	38.2	0	-0.217343	2.15559	0.00344551	0.0479935	-1.47525	0.359672	41541.7	115499	48500.6	35384.6	50031.5	60108.5	34598	54070.5	16680	54199	21439.5	40405.2	73514.9	113205	67060.2	204562	143242	67930.7	51977.3	60484.4	118142	254870
11.25_600.4014m/z	600.401	11.2494	pos	PC(22:1(13Z)/0:0)	LMGP01050141	Lipids and lipid-like molecules	Glycerophospholipids	Glycerophosphocholines	M+Na	C30H60NO7P	49	53	2.46464	2.12005	0.00432395	0.0521925	-1.47868	0.358817	38696.6	107845	55361.7	38667	9587.35	85582.9	63614.3	42529	19696.5	43676.5	3925.6	24324.9	81689.7	107866	78248.1	200987	202987	57387.2	47181.6	51212.1	73833.2	177057
9.89_476.2743m/z	476.274	9.8859	pos	PC(13:0/0:0)	LMGP01050001	Lipids and lipid-like molecules	Glycerophospholipids	Glycerophosphocholines	M+Na	C21H44NO7P	38.3	0	-1.02468	1.05552	0.000423309	0.0324824	-1.48241	0.357891	10406.6	29077.4	20353.2	8220.15	7722.92	16130.6	11678.5	10122.9	6280.97	14686	2035.72	6834.72	20612.7	22430.7	24017	43667.3	30843.8	15575	21234.7	19801.5	37735.4	54856.3
9.94_450.3574m/z	450.357	9.94228	pos	Neochlorogenin	LMST01080020	Lipids and lipid-like molecules	Sterol Lipids	Sterols	M+NH4	C27H44O4	37.9	0	-0.809247	1.17663	0.0238538	0.117621	-1.48346	0.35763	14014.9	39188.2	15276.9	10034.9	18435.6	32910.9	4301.02	25290.1	1609.16	10990.8	7.93017e-07	21299.6	18988.7	45422.9	28839	43761.6	62738	12101.2	9351.03	11727.9	51334.8	107617
12.21_404.2920n	405.299	12.206	pos	MG(22:5(4Z,7Z,10Z,13Z,16Z)/0:0/0:0)	62367	Lipids and lipid-like molecules	Glycerolipids	Monoradylglycerols	M+H-H2O, M+H	C25H40O4	53.2	72.7	-1.5783	2.73062	0.0140374	0.0882334	-1.4904	0.355914	68033.4	191151	76502.2	51129	21382.1	196730	89060.6	80418.8	48766.9	68313.4	13455.1	34576.3	107428	149221	140419	259882	305006	110512	98818.2	110594	115969	513664
10.61_468.3081m/z	468.308	10.6091	pos	PA(19:1(9Z)/0:0)	LMGP10050025	Lipids and lipid-like molecules	Glycerophospholipids	Glycerophosphates	M+NH4	C22H43O7P	38.8	0	-0.891027	1.66948	0.00347742	0.0481289	-1.49507	0.354763	26512.2	74732.1	39398.4	19202.6	50445.5	30636.2	22531.3	24667.2	14325.2	32364.4	13665.3	17885.6	40786.5	65975.7	51740.2	126384	139384	28984.6	34523.1	34517.8	96944.7	128081
1.14_499.0793m/z	499.079	1.13565	pos	Visnagin	LMPK13110003	Lipids and lipid-like molecules	Polyketides	Aromatic polyketides	2M+K	C13H10O4	38.5	0	0.615353	2.57844	8.00312e-05	0.0236071	-1.49716	0.354251	141976	400777	174506	132887	7.93017e-07	229711	111176	262287	106455	38502.5	211846	152386	460293	548941	270243	133697	473396	467774	298760	596171	386668	371827
10.35_502.2942m/z	502.294	10.3466	neg	PE(20:3(11Z,14Z,17Z)/0:0)	LMGP02050065	Lipids and lipid-like molecules	Glycerophospholipids	Glycerophosphoethanolamines	M-H	C25H46NO7P	38.6	0	0.57352	1.2194	0.000620673	0.0343983	-1.50025	0.353492	14033.2	39698.7	23739.5	11456	423.164	18416.6	15490.7	30140.9	9751.77	17310.2	2577.42	11025.3	32569.7	51484	33781.6	45718	45669.8	27846.5	20360.6	20662.6	39746.8	79147.3
11.24_550.3856m/z	550.386	11.2353	pos	PC(18:1(9Z)e/2:0)	HMDB0011148	Lipids and lipid-like molecules	Glycerophospholipids	Glycerophosphocholines	M+H	C28H56NO7P	37.2	0	-1.97271	1.27429	0.00258176	0.0427736	-1.53286	0.345592	13871.5	40138.4	27847.3	10955.4	6152.14	14643.7	15550.3	22584.7	11602.8	20602.6	7.93017e-07	8776.09	24912.3	50807.8	31582.7	59227.4	60472.2	14804.6	17854.8	15264	48229.1	78228.7
12.25_304.2402n	303.233	12.2529	neg	8,11-eicosadiynoic acid	24087	Lipids and lipid-like molecules	Fatty Acyls	Fatty Acids and Conjugates	M-H, M+FA-H	C20H32O2	47.7	43.8	-0.193351	1.62951	0.00224419	0.0412704	-1.53903	0.344117	23432.5	68094.5	33508.8	15673.8	39474.9	36860.5	18786.3	27171.9	9428.28	26744.3	10107.5	16568.7	44229.2	63039.7	35341.3	100372	99189.2	39175.2	50458.8	38500.1	57165.6	153473
12.89_333.2782m/z	333.278	12.8949	pos	Adrenic Acid	LMFA01030178	Lipids and lipid-like molecules	Fatty Acyls	Fatty Acids and Conjugates	M+H	C22H36O2	53.7	74.9	-1.86663	2.32513	0.00718934	0.063839	-1.54296	0.34318	45127.3	131497	63798.2	21400.1	47684.3	55823.5	44045.2	74151.5	22616.2	83343.3	14196.8	24213.6	95106.3	109971	92557.4	205187	209551	61263.1	65720	52152.2	100822	322642
9.07_299.2821n	300.289	9.07102	pos	Sphingosine	392	Organic nitrogen compounds	Organonitrogen compounds	Amines	M+H-H2O, M+H	C18H37NO2	55.9	83.7	-1.22208	10.4835	0.00194108	0.039837	-1.5498	0.341558	878658	2.5725e+06	1.29799e+06	793112	516086	1.85266e+06	1.22173e+06	712051	414478	1.00853e+06	326208	643743	1.49297e+06	2.26556e+06	1.60646e+06	4.66506e+06	4.12706e+06	1.18696e+06	1.50659e+06	1.35078e+06	2.9571e+06	4.5665e+06
10.00_474.3574m/z	474.357	9.9989	pos	Clupanodonyl carnitine	HMDB0006496	Lipids and lipid-like molecules	Fatty Acyls	Fatty acid esters	M+H	C29H47NO4	38.4	0	-0.845237	1.36259	0.010915	0.0779349	-1.55514	0.340295	14918.2	43839	18560.9	5983.99	648.755	43936	11075.2	27046.3	1805.75	17598.2	3700.57	18826	26409.9	44616.5	27899.1	62406.1	79505.9	15515.9	20739	19267.7	38342	103688
11.56_402.2766n	403.284	11.5627	pos	MG(0:0/22:6(4Z,7Z,10Z,13Z,16Z,19Z)/0:0)	62340	Lipids and lipid-like molecules	Glycerolipids	Monoradylglycerols	M+H-H2O, M+H	C25H38O4	53.2	73.2	-0.982226	1.78448	0.0144406	0.0896311	-1.55731	0.339784	25917.7	76276.9	24634.9	16851.3	16324.6	73865.9	33121.9	37422.5	16199.7	16703.5	4075.62	19976.9	51630	58442.7	56679.4	153013	153880	32143.6	24616.5	38634.5	34819.6	158909
12.16_330.2764n	331.284	12.1626	pos	MG(16:0/0:0/0:0)	HMDB0011564	Lipids and lipid-like molecules	Glycerolipids	Monoradylglycerols	M+H-H2O, M+H	C19H38O4	38.2	0	-1.85128	1.38631	0.00656784	0.061186	-1.57537	0.335557	15889.4	47352.4	19598.8	17496.9	14423.6	23317.3	16553.5	12619.4	18647.9	14735.2	7575.35	13926.6	30280.8	37122.6	39587.2	103163	72197.9	14561.5	16300.8	17325.7	49376.6	93608.1
12.35_330.2764n	331.284	12.3496	pos	MG(0:0/i-16:0/0:0)	HMDB0072873	Lipids and lipid-like molecules	Glycerolipids	Monoradylglycerols	M+H-H2O, M+H	C19H38O4	37.9	0	-1.70869	1.0258	0.00157407	0.0382816	-1.58146	0.334143	8842.68	26463.7	16840.9	9315.15	11734.6	9796.37	13270.6	5783	3579.04	7350.47	2870.9	7885.77	16905.5	27893.9	15451.9	41718.7	44941.9	14670	14550.5	10175.1	29296.7	49033
11.36_507.3321n	508.339	11.3631	pos	LysoPE(20:1(11Z)/0:0)	HMDB0011512	Lipids and lipid-like molecules	Glycerophospholipids	Glycerophosphoethanolamines	M+H, M+Na	C25H50NO7P	55	81.7	-0.776868	2.4969	0.00138874	0.036962	-1.58883	0.332442	51585.2	155171	105132	43585.6	9158.29	53647	59746.7	90485	34973	76333.9	7005.36	35785.6	81937.7	175140	141465	219904	210363	68529.7	73461.1	78952.6	192608	309346
17.49_526.3125m/z	526.313	17.4922	pos	26,26,26,27,27,27-hexafluoro-1alphaa-hydroxyvitamin D3 / 26,26,26,27,27,27-hexafluoro-1alphaa-hydroxycholecalciferol	LMST03020085	Lipids and lipid-like molecules	Sterol Lipids	Secosteroids	M+NH4	C27H38F6O2	36	0	2.19614	1.35391	0.000647893	0.0343983	-1.61235	0.327064	19900.9	60847.2	34774.3	20788	19810.1	26611.8	16324.8	14957.2	10426.2	25516.7	13554.8	16245.6	32677.2	58425.9	59161.4	81711.5	74107.8	8515.28	37528.9	55379.6	117179	83785.8
12.36_379.1582m/z	379.158	12.363	neg	Ecabet	HMDB0015613	Lipids and lipid-like molecules	Prenol lipids	Diterpenoids	M-H	C20H28O5S	41.4	15.5	-0.811831	1.36056	0.00651923	0.0609254	-1.61335	0.326838	23147.9	70823.9	34629.1	26606.1	70998.7	20209.7	12137.8	9832.96	4507.09	7076.47	24554.7	20926.9	57117.8	132614	21048	106142	49037.1	36258.5	25559.4	34253.5	119841	126367
17.21_369.3510m/z	369.351	17.2148	pos	Cholesterol	LMST01010001	Lipids and lipid-like molecules	Sterol Lipids	Sterols	M+H-H2O	C27H46O	38.8	0	-1.46906	8.51462	0.00183938	0.0389959	-1.61846	0.325683	606602	1.86255e+06	991280	401548	896063	1.12549e+06	500833	492448	397506	525269	374768	360812	1.01679e+06	1.56688e+06	1.4399e+06	3.00444e+06	3.02193e+06	527127	1.01868e+06	1.1284e+06	2.27857e+06	3.62282e+06
11.90_326.3048m/z	326.305	11.9048	pos	Oleoyl Ethanolamide	24103	Unclassified	Unclassified	Unclassified	M+H	C20H39NO2	54.7	81	-1.85794	1.69769	0.000732159	0.0343983	-1.62685	0.323793	23188.1	71613.8	46495.7	21726.1	14163.4	40889.2	24092.8	22865.5	12304.4	23190	7144.51	19009	46397.5	64150.4	50303	100840	99912.6	27739	46519.4	43388.2	96984	139904
10.56_639.2767m/z	639.277	10.5592	neg	Hildgardtene	LMPK12020282	Lipids and lipid-like molecules	Polyketides	Flavonoids	2M-H	C21H20O3	38.8	0	2.38328	1.52318	0.00338801	0.0477294	-1.63117	0.322827	18422.4	57065.8	39792.6	16602.2	7.93017e-07	24371.6	22704	16999	21459.8	26628.2	2606.8	13059.5	53859.8	55430.3	44335.2	141158	58668.3	32257.2	35777.4	30435.2	31397.1	87339.1
10.94_556.3393m/z	556.339	10.9368	pos	LysoPE(22:2(13Z,16Z)/0:0)	HMDB0011522	Lipids and lipid-like molecules	Glycerophospholipids	Glycerophosphoethanolamines	M+Na	C27H52NO7P	47.9	49.3	3.61366	3.09737	0.00212739	0.040977	-1.64408	0.31995	68930.6	215442	117783	62291.6	9514.99	125204	90230.3	80630	46045	90631.2	10669.2	56307.4	173973	184988	121110	387651	289637	122415	130015	128452	151807	464372
12.96_381.1737m/z	381.174	12.9588	neg	S-Japonin	HMDB0035802	Lipids and lipid-like molecules	Prenol lipids	Sesquiterpenoids	M+FA-H	C19H28O3S	39.6	7.19	-1.16576	2.89612	0.000104781	0.0246758	-1.66435	0.315487	69757.4	221110	163147	89595.4	22263.7	97160.9	53756.5	80226.3	48718.9	56447.5	16147.9	70109.8	163415	300231	148955	257949	245659	158023	142000	144343	242266	408259
6.58_888.6466m/z	888.647	6.57512	pos	PC(22:0/20:4(8Z,11Z,14Z,17Z))	HMDB0008543	Lipids and lipid-like molecules	Glycerophospholipids	Glycerophosphocholines	M+Na	C50H92NO8P	31.5	0	1.47868	1.29377	0.0350039	0.145643	-1.6652	0.3153	17279.4	54802.9	7.93017e-07	7.93017e-07	7.93017e-07	36878.1	32569	60774.5	1221.79	30584.3	7.93017e-07	10765.9	9701.55	58980.7	13131.2	115310	54164.9	9953.36	126471	54606.8	7.93017e-07	105709
10.04_528.2734m/z	528.273	10.0435	neg	PS(20:3(8Z,11Z,14Z)/0:0)	LMGP03050022	Lipids and lipid-like molecules	Glycerophospholipids	Glycerophosphoserines	M-H2O-H	C26H46NO9P	43.8	25.5	0.38138	1.03355	0.000877073	0.0347479	-1.66684	0.314942	14801	46996.1	41439.2	28456.4	1718.17	22312.6	9518.23	4440.41	13548.8	10864.7	517.345	15194.5	51181.2	36799.9	52109.1	40732.6	93136.4	14397.2	24390.3	65257.5	55530.3	36426.5
15.95_509.4804n	510.488	15.9516	pos	Cer(d18:1/14:0)	41564	Lipids and lipid-like molecules	Sphingolipids	Ceramides	M+H, M+Na, M+H-H2O	C32H63NO3	49.9	55.7	-0.779456	1.66723	0.000963741	0.0350162	-1.66986	0.314284	22555.4	71767.6	35918.8	39896.8	1511.99	34421.6	27971.8	28656.3	14188.7	21374.7	4096.14	17517.3	61586	67906	72127.6	109890	106530	17286.9	34114.8	44805	64301.1	139129
7.97_362.3258m/z	362.326	7.97155	pos	10,20-Dihydroxyeicosanoic acid	HMDB0031923	Lipids and lipid-like molecules	Fatty Acyls	Fatty acids and conjugates	M+NH4	C20H40O4	50	56.8	-1.8514	1.47546	0.00211697	0.040977	-1.67527	0.313108	16778.5	53586.9	14182.7	16300.7	16628.9	25639.9	21855.1	10964.2	20384.6	17430	13884.7	10514.1	43031.9	42254.2	30203.5	99965.4	111039	29757.1	22413.6	24127.8	54279.1	78797.5
12.42_331.2625m/z	331.263	12.4211	pos	DPA	LMFA04000044	Lipids and lipid-like molecules	Fatty Acyls	Docosanoids	M+H	C22H34O2	54.3	77.9	-1.88687	2.96919	0.00462344	0.0533515	-1.67568	0.313019	67401.6	215328	113821	46104.1	47331.3	71551.2	53046.3	116804	32417.2	118024	22372.3	52545	139835	223772	154564	293032	316801	91412.2	94612.8	108992	185001	545256
6.58_762.2713m/z	762.271	6.57512	pos	Trabectedin	HMDB0015609	Benzenoids	Benzene and substituted derivatives	Benzazocines	M+H	C39H43N3O11S	31.3	0	2.86256	1.18353	0.025662	0.122835	-1.70765	0.306159	14540.9	47494.6	7.93017e-07	734.933	391.266	24308.8	31813.6	46579.8	1597.15	31931.9	7.93017e-07	8051.29	10971.4	50973.9	14785.1	93551.7	39584.4	18010	112727	44588.9	3.74386	89749.4
17.46_667.3081m/z	667.308	17.4619	neg	PI(20:3(8Z,11Z,14Z)/0:0)	LMGP06050021	Lipids and lipid-like molecules	Glycerophospholipids	Glycerophosphoinositols	M+FA-H	C29H51O12P	37	0	-3.05543	1.79382	0.00611048	0.0596718	-1.72275	0.302971	21918.6	72345.5	26508.2	14517.4	1769.44	28722.6	32227.7	22218.9	19025.6	55674	5668.86	12853.3	16199.6	40657.1	53312.9	134291	151151	39264.5	60457	30786.3	61974.9	135360
1.14_303.0832m/z	303.083	1.1391	neg	N-Acetylaspartylglutamic acid	44358	Organic acids and derivatives	Carboxylic acids and derivatives	Amino acids, peptides, and analogues	M-H	C11H16N2O8	47.4	43.9	-0.685911	1.61792	0.00772914	0.0664216	-1.73588	0.300226	28148.5	93757.6	22330.4	12275.1	81.3097	9793.01	12390.9	28563.8	66112	34666.7	39124.8	56146.8	168866	64608	14837.2	185341	185472	70736.8	31768.4	69379.9	116581	29984.4
9.06_714.4929m/z	714.493	9.05688	pos	11b,21-Dihydroxy-5b-pregnane-3,20-dione	LMST02030188	Lipids and lipid-like molecules	Sterol Lipids	Steroids	2M+NH4	C21H32O4	35.7	0.33	-1.50351	5.88272	0.00160381	0.0384549	-1.73752	0.299886	245014	817024	433205	242776	184888	403859	373588	178863	109546	249896	106844	166674	544300	728389	526724	1.30124e+06	1.25985e+06	265763	418560	425298	1.0112e+06	1.68891e+06
9.11_499.2694n	500.277	9.114	pos	LysoPE(20:5(5Z,8Z,11Z,14Z,17Z)/0:0)	HMDB0011519	Lipids and lipid-like molecules	Glycerophospholipids	Glycerophosphoethanolamines	M+H, M+Na	C25H42NO7P	55.2	83.6	-1.04293	2.15502	0.000373498	0.030793	-1.7588	0.295495	34069	115295	49105.3	33493.6	8260.7	61297.2	44522.5	39010.3	18641	36665.2	12263.2	37430.8	67954.1	109524	77846.3	132064	224827	57617.2	79479.3	75145.9	135087	193403
10.99_598.3862m/z	598.386	10.9933	pos	LysoPC(22:2(13Z,16Z))	HMDB0010400	Lipids and lipid-like molecules	Glycerophospholipids	Glycerophosphocholines	M+Na	C30H58NO7P	53.1	71.3	3.19941	3.43787	0.00167071	0.0388248	-1.77764	0.29166	76230.3	261367	112410	50424.7	11006	153308	102460	130521	42276.1	97294.2	7647.71	54955.2	183770	245030	134196	413826	370756	157483	187349	163799	163290	594170
16.11_580.4946m/z	580.495	16.1074	neg	N-[(4E,8E)-1,3-dihydroxyoctadeca-4,8-dien-2-yl]hexadecanamide	HMDB0035480	Lipids and lipid-like molecules	Sphingolipids	Ceramides	M+FA-H	C34H65NO3	54.8	81.1	-0.14536	1.66503	0.00236145	0.0420454	-1.79383	0.288406	18307.3	63477.5	39949	18713.7	6121.58	30044.7	15192.7	20529.7	19393.7	18223.1	2119.85	12785	33096.9	56239	37077.1	104089	83354.6	27016.4	36616.9	46096.3	60828.4	150360
11.22_574.3857m/z	574.386	11.2211	pos	PC(O-16:0/4:0)	LMGP01020072	Lipids and lipid-like molecules	Glycerophospholipids	Glycerophosphocholines	M+Na	C28H58NO7P	37.2	0	2.43602	1.16007	0.00139391	0.036962	-1.80601	0.285981	9242.28	32317.8	19108.2	5645.17	7.93017e-07	14786.7	11962.4	18125.6	4136.51	10286.1	7.93017e-07	8372.07	19161.8	38183.9	30100.9	43060.7	58575.2	8706.09	19079	16113.2	27753.5	62444.1
9.16_541.3164n	542.324	9.15735	pos	PC(20:5(5Z,8Z,11Z,14Z,17Z)/0:0)	LMGP01050050	Lipids and lipid-like molecules	Glycerophospholipids	Glycerophosphocholines	M+H, M+Na	C28H48NO7P	38.5	0	-0.823305	1.15163	0.00271784	0.0437224	-1.81812	0.283591	9215.98	32497.5	9766.12	7066.15	2472.3	12233.7	16490.9	15418.3	4828.74	12242.7	1454.22	10186.7	19321.8	37473.1	22364.9	47909.9	78035.8	12844	17361.5	15051.4	26655.6	47956.5
9.41_456.3079m/z	456.308	9.40922	pos	1-(2-methoxy-13-methyl-tetradecanyl)-sn-glycero-3-phosphoethanolamine	LMGP02060011	Lipids and lipid-like molecules	Glycerophospholipids	Glycerophosphoethanolamines	M+H	C21H46NO7P	55.4	83.4	-1.15935	1.05448	0.00235501	0.0420454	-1.83352	0.28058	8677.77	30928	22885.6	5170.72	2896.96	20545.8	8122.5	7390.6	4765.91	7500.42	1073.22	6426.06	16295.8	33356.8	26093.2	25485.8	38184.7	11096.9	18711.1	17379.6	51583.8	71092.6
0.77_499.0793m/z	499.079	0.774933	pos	Wyeronic acid	HMDB0039141	Lipids and lipid-like molecules	Fatty Acyls	Fatty acids and conjugates	2M+K	C13H10O4	37.7	0	0.750118	1.31382	0.00363386	0.0488136	-1.85096	0.277208	32410.2	116917	43824.9	60502.4	7.93017e-07	36838.9	41869.5	43147.6	19866.2	7.93017e-07	21059.9	56992.6	202386	246107	62384.7	7.93017e-07	82859.8	30238.2	106718	122227	140898	175349
10.96_642.3781m/z	642.378	10.9613	neg	OHOHA-PC	LMGP20010033	Lipids and lipid-like molecules	Glycerophospholipids	Oxidized glycerophospholipids	M-H2O-H	C33H60NO10P	53.9	76.7	0.685509	1.28836	0.00409985	0.0510015	-1.86162	0.275166	9927.81	36079.3	15813.8	6714.42	304.658	20133.2	13188.6	17353.4	5188.33	12847.7	7.93017e-07	7733.94	23089.2	33297.7	17876.4	61761.6	46272.1	25489.4	23724.5	19718.9	17682.3	91881
11.41_600.4017m/z	600.402	11.4058	pos	LysoPC(22:1(13Z))	HMDB0010399	Unclassified	Unclassified	Unclassified	M+Na	C30H60NO7P	50.2	59.1	3.01834	1.85987	0.00371199	0.0492904	-1.89099	0.269622	21258.9	78846.9	30962.9	15964.8	47968.8	39216.8	25412.1	17599.2	7715.64	15068.4	1755.6	10924.9	63708.1	59062.2	43039.3	162277	120277	35581	34726.9	37054.3	61462.9	171281
16.38_553.5063n	554.514	16.3813	pos	Cer(d14:1(4E)/20:0(2OH))	102971	Unclassified	Unclassified	Unclassified	M+H, M+Na	C34H67NO4	55.8	87.1	-1.19512	1.29074	0.00515964	0.0561345	-1.89249	0.269342	11486	42644.9	21273.7	12995.5	6990.65	17580.8	6264.78	18400.6	8807.72	17763.6	1218.55	3564.59	28986.7	34285.2	21427.1	42382.2	61635.3	8650.76	23387.1	35526.8	53966.5	116201
12.59_399.3252m/z	399.325	12.5923	pos	23,24-didehydro-25-hydroxyvitamin D3 / 23,24-didehydro-25-hydroxycholecalciferol	42094	Unclassified	Unclassified	Unclassified	M+H	C27H42O2	54.8	82.2	-1.33146	1.82189	0.0453746	0.169478	-1.89719	0.268466	20654.6	76935.7	74533.7	14287.7	7.93017e-07	29031.4	18019.1	40446.9	17101.5	4210.21	7.93017e-07	8915.45	30935.9	59012	22236	146372	73973.9	12338.9	26708.6	33591.3	92591.4	271597
10.42_368.3518m/z	368.352	10.4247	pos	20:2(5Z,9Z)(11Me,15Me,19Me)	LMPR0103010018	Lipids and lipid-like molecules	Prenol lipids	Isoprenoids	M+NH4	C23H42O2	35.1	0	-1.44229	1.07932	0.00178	0.0388929	-1.91935	0.264374	6853.62	25924	10073.3	5351.43	5236.26	24729.9	3882.72	7237.1	2938.2	4730.44	7.93017e-07	4356.82	19530.6	22463.1	22682.1	48189.4	41250.4	8381.02	12996.7	9240.09	26791.9	47714.2
12.11_328.2402n	327.233	12.1068	neg	(4Z,7Z,10Z,13Z,16Z,19Z)-4,7,10,13,1 6,19-Docosahexaenoic acid	3457	Lipids and lipid-like molecules	Fatty Acyls	Fatty acids and conjugates	M-H, M+FA-H	C22H32O2	48.6	47.7	-0.20136	1.47666	0.00717386	0.0637995	-1.9337	0.261757	13653.9	52162.5	17827.6	9157.21	20663.1	19887.2	12515.8	19857.1	5669.62	14449.3	5926.11	10586	28440.8	57735.6	23539.8	85079	62115.9	28822	34073.6	25857.9	26755.8	149205
10.03_554.2873m/z	554.287	10.0272	pos	Vignatic acid A	HMDB0033599	Organic acids and derivatives	Carboxylic acids and derivatives	Amino acids, peptides, and analogues	M+H	C30H39N3O7	38.5	0	2.27325	1.29532	0.000254661	0.0273714	-1.93673	0.261208	16268.6	62282.2	39746	28102.8	7.93017e-07	31868	11576.5	4949.7	17984.5	9862.39	1977.31	16618.7	61223.7	41542.4	64044.6	74942.6	107817	18527.6	32034.7	107981	60550.1	54158.8
9.28_302.3049m/z	302.305	9.27788	pos	Sphinganine	395	Organic nitrogen compounds	Organonitrogen compounds	Amines	M+H	C18H39NO2	58.2	96	-1.58557	2.90372	0.00552706	0.0580559	-1.96602	0.255958	50359.7	196750	74868.6	41775.6	83002	73017.2	67583.4	30656.7	25965.7	40775	33201.9	32750.8	181441	133901	72000.4	516232	320759	65463.7	81407.5	76871.1	259876	259546
8.80_346.3311m/z	346.331	8.79542	pos	20-hydroxy-eicosanoic acid	LMFA01050075	Lipids and lipid-like molecules	Fatty Acyls	Fatty Acids and Conjugates	M+NH4	C20H40O3	55.3	83.2	-1.46827	1.12588	0.00206317	0.0406584	-2.01962	0.246623	6865.97	27839.9	7460.04	5781.9	4990.56	16479.1	8184.12	5494.85	5890.03	7448.73	2811.72	4118.68	20067.7	20875.4	15500.3	51403.2	62201.4	14633.3	9386.9	12290.8	31180.6	40859.6
9.86_314.3412m/z	314.341	9.85757	pos	Thromboxane	LMFA03030015	Lipids and lipid-like molecules	Fatty Acyls	Eicosanoids	M+NH4	C20H40O	39.8	6.18	-1.94965	1.44205	0.0070135	0.0631482	-2.03498	0.244011	18195.9	74570	12959.4	10764.2	38781.7	16933.8	56250.9	8806.41	15903.7	9148.89	5818.71	6591.13	145438	160739	17186	107478	64714.2	11315.5	18461.9	47805	44874.8	127688
12.59_329.2486m/z	329.249	12.5908	neg	7Z, 10Z, 13Z, 16Z, 19Z-docosapentaenoic acid	24096	Unclassified	Unclassified	Unclassified	M-H	C22H34O2	48.3	46.3	-0.0265491	1.25094	0.00305715	0.0461282	-2.05948	0.239903	7705.71	32120.1	14071.6	5409.22	1661.51	19980.6	9859.64	7815.35	2642.74	9430.91	892.518	5293.08	16460.5	31390.6	14751.3	61395	50772.9	15249.2	22263.8	18692.8	16673.7	73551.3
16.66_523.4962n	524.503	16.6584	pos	Cer(d16:1/17:0)	LMSP02010015	Lipids and lipid-like molecules	Sphingolipids	Ceramides	M+H, M+Na, M+H-H2O	C33H65NO3	45.5	33.7	-0.542813	1.97831	0.00192093	0.0395591	-2.14981	0.225343	20310.6	90131.7	42057	23020.8	13346.7	36316.8	16288.8	23315.9	12514.9	24467.3	5063.4	6714.03	63559.1	81771.7	63967.4	128741	109216	21307.3	36306	58864.1	106685	230900
11.49_490.4249m/z	490.425	11.491	pos	1alpha,25-dihydroxy-26,27-dimethyl-24a,24b-dihomovitamin D3 / 1alpha,25-dihydroxy-26,27-dimethyl-24a,24b-dihomocholecalciferol	LMST03020499	Lipids and lipid-like molecules	Sterol Lipids	Secosteroids	M+NH4	C31H52O3	38	0	-1.11486	1.70277	0.0446701	0.168078	-2.21127	0.215944	13610.5	63028	7.93017e-07	7.93017e-07	610.147	84850.8	21546.5	9604.12	7.93017e-07	19493.5	7.93017e-07	7.93017e-07	41026.3	37041.1	14488.8	125151	74688.4	30971.4	37076.6	41688.4	7.93017e-07	228149
12.87_431.1893m/z	431.189	12.869	neg	S-Furanopetasitin	HMDB0036131	Lipids and lipid-like molecules	Prenol lipids	Sesquiterpenoids	M-H	C24H32O5S	38.2	0	-1.10612	2.16807	0.016192	0.0948905	-2.24613	0.210789	21442.1	101723	36911	17054.6	20252.1	32725.1	18968.1	27857.8	8092.51	19111.1	9343.13	24105.6	38352.4	87307	41102	159749	177753	44587.8	40170	34370.8	64837.8	329003
10.52_386.3986m/z	386.399	10.5237	pos	Lignoceric acid	LMFA01010024	Lipids and lipid-like molecules	Fatty Acyls	Fatty Acids and Conjugates	M+NH4	C24H48O2	38.1	0	-1.72066	1.13094	0.0122758	0.0822595	-2.31549	0.200895	6949.03	34590.4	3160.97	3263.53	18424.9	6472.39	24423.6	4342.28	3938.01	2234.56	400.035	2830.09	59180.1	48296.9	7319.03	43395.6	59719.5	3922.76	2907.89	15486.6	13500.1	92175.3
11.47_483.2729m/z	483.273	11.4741	neg	PG(16:0/0:0)[U]	40874	Unclassified	Unclassified	Unclassified	M-H	C22H45O9P	52.2	66.2	0.0255263	1.44617	0.0208728	0.108837	-2.39123	0.190619	9721.03	50997	10849.9	8063.15	17372.2	14469.6	5847.19	6034.54	4812.49	10005.1	12554.3	7201.8	58884.8	27330.6	18062.1	187357	63128.9	16236.3	16746.5	20394.5	50639.9	51190.2
16.37_598.5053m/z	598.505	16.3706	neg	Cer(d18:1(8E)/16:0(2OH[R]))	LMSP02010099	Lipids and lipid-like molecules	Sphingolipids	Ceramides	M+FA-H	C34H67NO4	54.1	79.5	0.0892061	1.27642	0.00285175	0.0445943	-2.47748	0.179558	6274.2	34942.4	13715.2	6923.08	767.158	9226.94	1811.35	12102.7	2993.98	12861.9	7.93017e-07	2339.65	17406.3	25853.3	11259	39148.7	53261.3	13687.8	21184.3	21778.2	51124.9	94720.3
0.76_321.0693n	320.062	0.7611	neg	Beta-Citryl-L-glutamic acid	HMDB0013220	Organic acids and derivatives	Carboxylic acids and derivatives	Amino acids, peptides, and analogues	M-H, 2M-H, M-H2O-H	C11H15NO10	51.9	62	-0.843166	8.30202	0.0410175	0.159759	-2.50623	0.176015	355688	2.02079e+06	403329	252371	36927.8	161951	292391	277714	899217	525253	288810	418914	4.1279e+06	781210	296957	7.90966e+06	2.66769e+06	1.19525e+06	765733	868861	1.23661e+06	357990
17.46_735.2958m/z	735.296	17.4619	neg	Phomopsin B	HMDB0038884	Unclassified	Unclassified	Unclassified	M-H2O-H	C36H46N6O12	34.8	0	-4.96319	1.11678	0.0100652	0.0749148	-2.69396	0.154538	3682.13	23826.6	6504.13	7.93017e-07	7.93017e-07	4992.14	5110.3	6248.58	7.93017e-07	13966.2	7.93017e-07	7.93017e-07	2663.45	8475.39	10599.1	48242.4	56198.5	3972.89	22227.4	10326.9	18358.1	57202.3
10.10_981.5922m/z	981.592	10.0983	pos	PIM1(16:0/18:1(9Z))	LMGP15010007	Lipids and lipid-like molecules	Glycerophospholipids	Glycerophosphoinositolglycans	M+H-H2O	C49H91O18P	37.6	0	1.13856	2.39006	0.00467595	0.0536227	-2.81748	0.141858	15026.9	105929	38905.1	7331.72	7.93017e-07	40280.3	18141.6	14940.2	4478.04	18430.3	7.93017e-07	7761.74	37862	77710.4	65139.9	253774	210536	9059.56	43322.8	37215.9	111210	213465
12.93_481.3322m/z	481.332	12.9309	neg	Ganoderal A	HMDB0035983	Lipids and lipid-like molecules	Prenol lipids	Triterpenoids	M+FA-H	C30H44O2	53.1	68	-0.240289	1.96084	0.00118153	0.0357706	-3.26056	0.104345	7672.15	73526.5	16832.9	6433.88	20192.4	12791.8	2874.49	4298.49	2600.59	3669.79	1634.22	5392.87	28233.2	75278.9	36752.6	146097	86145.2	51817.3	23174.7	29984.3	73553	184229
17.45_650.4980m/z	650.498	17.4479	neg	GlcCer(d14:2(4E,6E)/18:0)	LMSP0501AA53	Lipids and lipid-like molecules	Sphingolipids	Neutral glycosphingolipids	M-H2O-H	C38H71NO8	37.3	0	-3.22839	2.23784	0.0166451	0.096348	-3.42915	0.0928373	8389.32	90365.8	17021.3	13123.7	7.93017e-07	35194.5	7.93017e-07	1922.87	7.93017e-07	16630.9	7.93017e-07	7.93017e-07	45424.7	27459.6	27002.6	326975	163978	33550.2	42025.9	22578.1	66178.3	148486
1.12_503.1497m/z	503.15	1.12177	pos	Eremopetasitenin B2	HMDB0030901	Organoheterocyclic compounds	Naphthofurans	Unclassified	M+K	C24H32O7S	37.1	0	-0.632887	2.29133	0.016808	0.0968209	-3.44943	0.0915415	12229.4	133594	9910.81	2520.49	7.93017e-07	7.93017e-07	7.93017e-07	4210.12	38977.5	25628.8	30756.6	10289.2	219014	44037.2	7.93017e-07	472395	232178	146776	31309.2	69685.1	114618	5923.18
0.76_240.0509m/z	240.051	0.7611	neg	Dopaquinone	HMDB0001229	Organic acids and derivatives	Carboxylic acids and derivatives	Amino acids, peptides, and analogues	M+FA-H	C9H9NO4	38.8	0	-2.38684	1.02285	0.0417793	0.161505	-3.63039	0.0807501	2304.89	28543.5	1462.73	1257.17	4145.9	244.715	1043.21	958.242	8485.16	1952.17	1640.45	1859.17	64824.5	10303.8	184.157	120736	37965.4	17895.2	5631.32	11530.4	13024.7	3339.83
17.15_600.5211m/z	600.521	17.1536	neg	Cer(t18:0/16:0)	LMSP02030001	Lipids and lipid-like molecules	Sphingolipids	Ceramides	M+FA-H	C34H69NO4	53.9	76.2	0.408584	1.7804	0.00244576	0.0421478	-4.19765	0.054498	3228.88	59247.7	18561	1788.56	834.946	4935.37	7.93017e-07	1269.79	7.93017e-07	4899.22	7.93017e-07	7.93017e-07	23744.1	36477.3	11105.2	77692.5	129481	15625.8	34685.6	22977.4	89983.7	150704
10.11_949.6234m/z	949.623	10.1125	pos	di-trans,poly-cis-undecaprenyl diphosphate	LMPR03030008	Lipids and lipid-like molecules	Prenol lipids	Polyprenols	M+Na	C55H92O7P2	35	0	2.5087	1.08489	0.0144092	0.0894679	-4.31421	0.0502682	1123.49	22349.8	7178.71	7.93017e-07	7.93017e-07	7.93017e-07	4056.15	7.93017e-07	7.93017e-07	7.93017e-07	7.93017e-07	7.93017e-07	2487.27	11125.8	8175.71	33873	64912.9	7.93017e-07	3181	3362.72	37095.9	59284
0.76_439.1555m/z	439.156	0.761033	pos	1-Isothiocyanato-7-(methylsulfinyl)heptane	HMDB0038441	Organosulfur compounds	Sulfoxides	Unclassified	2M+H	C9H17NOS2	36.4	0	-4.70249	1.02439	0.0163117	0.095309	-34.9936	2.92329e-11	7.93017e-07	27127.6	7.93017e-07	7.93017e-07	7.93017e-07	7.93017e-07	7.93017e-07	7.93017e-07	7.93017e-07	7.93017e-07	7.93017e-07	7.93017e-07	72156.1	9482.21	7.93017e-07	93751.5	36905.5	19483.5	10060.5	7.93017e-07	29436.3	7.93017e-07

## Sheet: Sa vs. Con-FMT
ID	m/z	Retention time (min)	Ion mode	Metabolites	Compound ID	Super Class	Class	Sub Class	Adducts	Formula	Score	Fragmentation Score	Mass Error (ppm)	VIP	P-value	adj.P-value	log2(FC)	FC	average(T5IMC)	average(T5Sa)	T5IMC-1	T5IMC-2	T5IMC-3	T5IMC-4	T5IMC-5	T5IMC-6	T5IMC-7	T5IMC-8	T5IMC-9	T5IMC-10	T5Sa-1	T5Sa-2	T5Sa-3	T5Sa-4	T5Sa-5	T5Sa-6	T5Sa-7	T5Sa-8	T5Sa-9	T5Sa-10
0.72_192.1228m/z	192.123	0.71945	pos	2-Propylglutaric acid	HMDB0060684	Lipids and lipid-like molecules	Fatty Acyls	Fatty acids and conjugates	M+NH4	C8H14O4	40.3	9.7	-1.5189	3.70848	9.06182e-05	0.0748334	2.29091	4.89363	149139	30476.1	115468	283133	139073	189109	234370	110164	131942	39923.2	87287.9	160916	29206.3	81906.2	25631.2	2503.71	15708.3	23054.2	12025	52800.2	22565.1	39360.4
7.06_227.1284m/z	227.128	7.06283	neg	Traumatic Acid	5882	Lipids and lipid-like molecules	Fatty Acyls	Fatty acids and conjugates	M-H	C12H20O4	55.4	83	-2.28725	1.66281	0.0410624	0.726926	1.99932	3.99811	41018.5	10259.5	41040.4	161625	28160.7	28903.9	51642	33837.4	21970.2	13771.1	12543.6	16690.2	8566.51	13380.5	11038.4	8838.93	8514.02	9444.61	9917.2	12307.7	14187.9	6398.96
6.46_619.3134n	642.305	6.461	pos	Glycylalanylprolylmethionylphenylalanylvalinamide	HMDB0033241	Organic acids and derivatives	Carboxylic acids and derivatives	Amino acids, peptides, and analogues	M+H, M+Na	C29H45N7O6S	37.6	5.88	-2.94743	2.53371	0.022822	0.652086	1.94114	3.84009	91419.6	23806.6	68508.4	271049	167112	58264.3	58767.1	173836	55607.1	16383	21861.2	22807.8	18760.9	14765.9	64387.7	20433.2	19826.3	6488.51	11340.1	26402.4	37768.5	17892.5
0.68_203.1753m/z	203.175	0.6779	pos	N-butylformamide	HMDB0062600	Organic acids and derivatives	Carboxylic acids and derivatives	Carboxylic acid derivatives	2M+H	C5H11NO	39.6	0	-0.55922	1.77086	0.00404693	0.43441	1.92141	3.78792	34844.1	9198.75	23294.5	97342.5	22747.3	41312.7	31601.4	32967.6	24918	13621.2	26713	33923.3	8695.88	22268.3	1859.43	2240.02	5853.47	10013	3524.43	25461.4	6517.26	5554.24
0.66_174.1124m/z	174.112	0.664033	pos	5-oxo-7-octenoic acid	LMFA01060165	Lipids and lipid-like molecules	Fatty Acyls	Fatty Acids and Conjugates	M+NH4	C8H12O3	45.3	35.1	-0.157616	2.40127	7.15345e-06	0.0251764	1.86306	3.63779	63336.1	17410.6	58970.3	98960	82217.1	79241.7	77621.8	52671.9	54536.6	24395.7	49916.9	54828.9	20712.7	35593	14478.5	6098.37	9640.38	17219.4	12035.2	31016	8243.97	19068.6
7.92_313.2368m/z	313.237	7.91538	pos	13-L-Hydroperoxylinoleic acid	HMDB0003871	Lipids and lipid-like molecules	Fatty Acyls	Lineolic acids and derivatives	M+H	C18H32O4	38.2	0	-1.78866	1.24489	0.0374486	0.720589	1.57413	2.97757	24535.2	8240.01	25718.8	76750.4	19883.3	49883	23506.1	17073	7915.66	5454.44	9044.12	10123	7698.55	11377.9	8055.11	4532.03	3953.01	5853.83	6167.09	13744.5	17762.2	3255.85
0.61_239.1499m/z	239.15	0.608367	pos	Pirimicarb	68822	Unclassified	Unclassified	Unclassified	M+H	C11H18N4O2	42.3	17.7	-1.29416	3.20971	0.000299941	0.136211	1.47648	2.7827	125981	45272.9	74755.8	172150	177404	149549	153648	126626	179733	47595.8	53709.7	124637	24527.6	94995.3	39293.1	13524.9	25331.2	60149.2	36224.4	83290.2	48481.2	26912.2
1.13_573.1427m/z	573.143	1.12517	neg	Mahuannin D	LMPK12030014	Lipids and lipid-like molecules	Polyketides	Flavonoids	M+FA-H	C30H24O9	33.7	0	4.70815	1.00187	0.0151618	0.606289	1.44539	2.72336	22111.6	8119.22	22465.2	45439	24657.8	40459.7	37707.9	6836.49	1531.83	7.93017e-07	18052.7	23965	3648.7	14037.7	5365.52	6319.73	7105.23	2086.54	11143	8273.5	14170.1	9042.11
7.65_606.3413m/z	606.341	7.65315	pos	PHODiA-PE	LMGP20020021	Lipids and lipid-like molecules	Glycerophospholipids	Oxidized glycerophospholipids	M+H-H2O	C29H54NO11P	41.8	21.1	1.85987	1.93678	0.0263552	0.675038	1.44199	2.71695	64457.6	23724.3	71940	200738	55659.3	68389.2	77225.1	58294	15701.1	23602.2	35856.4	37171.1	23714	20498.6	30565.1	31317.7	13996.8	16032.9	10289.3	29433.7	44857.6	16537.3
0.64_277.1057m/z	277.106	0.636133	pos	methyl 4-[2-(2-formyl-vinyl)-3-hydroxy-5-oxo-cyclopentyl]-butanoate	LMFA01050152	Lipids and lipid-like molecules	Fatty Acyls	Fatty Acids and Conjugates	M+Na	C13H18O5	37.3	0	4.05858	1.01514	0.00083596	0.209238	1.43401	2.70197	13113.2	4853.2	11686.9	21889.8	11244.4	12306.4	18083.5	13473.5	16182.9	7216.08	4170.92	14877.4	5173.35	11953.9	7.93017e-07	390.44	2707.92	6743.69	2540.2	10552.4	6145.91	2324.19
1.57_289.0848m/z	289.085	1.56573	pos	7-Methoxy-2-methylisoflavone	HMDB0033980	Phenylpropanoids and polyketides	Isoflavonoids	O-methylated isoflavonoids	M+Na	C17H14O3	36.7	0	4.85	1.59831	0.0362974	0.714495	1.36049	2.56772	39683.4	15454.7	9636	94395.5	52330	73745.2	35787.7	10046.9	61017.1	5957.54	12557.3	41360.7	14535.6	51783	13402.1	437.513	6253.6	3940.67	16200.2	24001.3	15003.1	8989.96
0.61_191.1389m/z	191.139	0.608367	pos	Isovalerylsarcosine	HMDB0002087	Organic acids and derivatives	Carboxylic acids and derivatives	Amino acids, peptides, and analogues	M+NH4	C8H15NO3	38.5	0	-0.938333	1.1261	3.0493e-05	0.0661011	1.34628	2.54255	17363	6828.98	11887.9	20420.2	18830.3	23455.5	23847.7	16515.2	22720.3	9576.7	9604.25	16772.2	4569.75	7553.61	6168.42	3824.05	4600.31	6763.32	8449.53	12249.3	5603.36	8508.23
2.16_238.1070m/z	238.107	2.15622	pos	Salsoline-1-carboxylate	HMDB0013067	Organoheterocyclic compounds	Tetrahydroisoquinolines	Unclassified	M+H	C12H15NO4	49.8	56.7	-1.74077	1.35926	0.0208094	0.639254	1.34318	2.5371	25658.3	10113.2	11963.1	42464.5	26216.9	27624.6	32627.4	7326.33	61835.1	1831.45	16817	27876.9	5935.07	24249.2	7942.66	840.251	5662.15	6652.98	7158.54	24904.5	8857.43	8929.66
0.80_113.0000m/z	113	0.802733	pos	Propionic acid	LMFA01010003	Lipids and lipid-like molecules	Fatty Acyls	Fatty Acids and Conjugates	M+K	C3H6O2	39	0	1.02424	1.92274	0.0134012	0.590756	1.32439	2.50428	94108.2	37579	11985.4	12149.1	63311.1	136630	170849	62775.7	201715	94704.2	87187.8	99775.5	5885.74	7590.16	55350.4	53194.3	50122.8	22489.6	42740	53156.2	55609.1	29651.5
1.71_277.1213m/z	277.121	1.70915	pos	1-Methoxy-4-[5-(4-methoxyphenoxy)-3-penten-1-ynyl]benzene	HMDB0041305	Benzenoids	Phenol ethers	Anisoles	M+H-H2O	C19H18O3	37.3	0	-3.35445	3.28731	0.00350133	0.413062	1.28274	2.433	170185	69948.4	145154	299154	215120	146689	223820	139536	193917	68356.5	102030	168072	83354.9	252204	64265.5	21332.4	47142.3	38055.7	28530.5	82820.4	35542.8	46236.2
4.87_279.0905m/z	279.091	4.86672	pos	Sulfamethazine	HMDB0015522	Benzenoids	Benzene and substituted derivatives	Benzenesulfonamides	M+H	C12H14N4O2S	37.9	3.46	-1.70653	1.10104	0.0312818	0.695984	1.26313	2.40015	19471.9	8112.78	9109.76	55588.5	21548.5	17146.4	20206.7	8319.18	33983	9732.55	7378.32	11706.2	8423.12	6443.04	5668.82	5682.15	5184.23	10637.1	7052.09	12061	12891	7085.25
7.20_318.2190n	319.226	7.20213	pos	Yucalexin P17	HMDB0036752	Lipids and lipid-like molecules	Prenol lipids	Diterpenoids	M+H-H2O, M+H	C20H30O3	53.1	72.2	-1.52812	1.78814	0.00869661	0.532921	1.22907	2.34416	42512.3	18135.4	22004.1	84066.4	41495.9	33126.3	41163.8	43030.6	86447	18694.1	20999.8	34094.9	18847.7	21204.4	16199.2	5701.91	9017.32	8352.92	15552.2	37417.5	31509.3	17551.3
5.04_316.2115m/z	316.211	5.03733	pos	Artemether	HMDB0015643	Lipids and lipid-like molecules	Prenol lipids	Sesquiterpenoids	M+NH4	C16H26O5	44.7	30.8	-1.28998	1.1573	0.00347518	0.413062	1.20973	2.31295	26372.6	11402.1	42737.3	15915.5	24598.3	17881.6	25341.2	49308.7	42945.2	15650.2	18800.8	10547.1	16252.6	7135.41	12234	6716.09	8411.41	12733.3	10894.9	14808.8	15503.6	9331.17
1.21_277.1213m/z	277.121	1.20512	pos	5-[(E)-2-(4-hydroxyphenyl)ethenyl]-2-[(1E)-3-methylbuta-1,3-dien-1-yl]benzene-1,3-diol	HMDB0128993	Unclassified	Unclassified	Unclassified	M+H-H2O	C19H18O3	36.7	0	-3.51682	2.32993	0.00861576	0.530864	1.20723	2.30894	96149.6	41642.3	62797.7	162816	131501	112027	129392	70734.1	129064	37637.1	42210.8	83316	47423.9	149169	39185.3	10394.9	27506.6	31354.3	11264.6	48502.7	21588.3	30033.4
7.20_353.2333m/z	353.233	7.201	neg	ent-Prostaglandin F2α	44829	Unclassified	Unclassified	Unclassified	M-H	C20H34O5	55.6	82.1	-0.0423265	2.29669	0.00835157	0.526665	1.15646	2.2291	76646.6	34384.6	34648.6	145085	79694.4	60849	77671.5	87065.2	151340	35870.9	35209.8	59031	33879.3	37029.5	32212.7	11794.6	20203.6	21262.2	30205.4	64388.2	54693.9	38176.7
1.32_325.1074m/z	325.107	1.31702	neg	8-(2-hydroxypropan-2-yl)-2-oxo-2H,8H,9H-furo[2,3-h]chromen-9-yl 3-methylbut-2-enoate	HMDB0128912	Unclassified	Unclassified	Unclassified	M-H2O-H	C19H20O6	45.4	38.6	-2.24363	2.48076	0.000235078	0.123537	1.04359	2.06136	167407	81212.3	231019	141253	264930	203411	157752	135167	90665.6	131907	145540	172430	113318	71410.2	78785.5	113756	116107	105064	66806.8	53538.3	34576.8	58760.6
1.13_337.0441m/z	337.044	1.12517	neg	Imidazoleacetic acid ribotide	HMDB0006032	Organic oxygen compounds	Organooxygen compounds	Carbohydrates and carbohydrate conjugates	M-H	C10H15N2O9P	38.7	0	-0.430916	2.24358	0.00244423	0.350288	1.03803	2.05342	89832.1	43747.7	75384.8	41594.8	79488.8	124718	123866	37957.7	82331.7	81911.5	121715	129352	60755.5	65230.9	46712.9	22813.8	16473.7	21513.8	25294.1	91005.9	45839.7	41836.4
0.72_120.1020m/z	120.102	0.71945	pos	Isovaleric acid	HMDB0000718	Lipids and lipid-like molecules	Fatty Acyls	Fatty acids and conjugates	M+NH4	C5H10O2	50.9	57.1	0.783854	8.79482	1.92927e-06	0.0242189	1.00467	2.00649	1.08213e+06	539314	1.04013e+06	1.49735e+06	996346	1.12371e+06	1.15948e+06	1.19347e+06	1.00781e+06	895251	809274	1.09846e+06	541055	725404	391270	317525	392329	564265	514078	874803	513092	559316
4.99_260.1854m/z	260.185	4.99137	pos	(±)-Hexanoylcarnitine	85174	Unclassified	Unclassified	Unclassified	M+H	C13H25NO4	46.9	39.1	-1.02498	2.17296	0.00247327	0.350288	1.00348	2.00483	106886	53314.4	36540.6	117378	114422	126160	80939.1	174974	182642	79994.4	77767.2	78045.6	39964.8	49841	71078.9	56207.5	67394.7	34847.5	32126.1	47253.2	71848.6	62581.6
8.32_314.2242n	315.231	8.3214	pos	Tetrahydrocannabinol	HMDB0014613	Organoheterocyclic compounds	Benzopyrans	1-benzopyrans	M+H-H2O, M+H	C21H30O2	38.5	0	-1.25857	1.27924	0.0430583	0.737016	0.991381	1.98809	64576.2	32481.6	182345	31751.1	58924	53178.1	48074.6	42609.7	22841.7	56596.1	84272.7	65169.4	15553.2	31153.3	12919.3	32734.9	50388.6	24394.7	32379.3	52329.9	32883.1	40079.7
0.72_237.1805m/z	237.18	0.71945	pos	Trimethylammonioacetate	HMDB0059606	Organic acids and derivatives	Carboxylic acids and derivatives	Amino acids, peptides, and analogues	2M+H	C5H12NO2+	51.7	63.4	-1.80607	7.75645	4.18964e-06	0.0242189	0.980364	1.97296	823952	417621	890173	1.064e+06	696049	823055	932645	821435	773325	702633	632025	904173	435802	602825	303108	206492	271256	450482	398882	710799	404248	392319
6.27_310.2008m/z	310.201	6.26785	pos	(3beta,6beta)-Furanoeremophilane-3,6-diol 6-acetate	HMDB0034930	Lipids and lipid-like molecules	Prenol lipids	Sesquiterpenoids	M+NH4	C17H24O4	46.7	39.6	-1.68843	1.36149	0.0253923	0.675038	0.975248	1.96598	48921.8	24884.2	42216.3	24428	40184.8	33748.2	39581.1	65006	131401	40592.5	35171.5	36888.3	20060	26568.9	24951.5	18808.9	26103.7	16083.7	33681.7	29353.5	25197.7	28032.2
0.75_326.0630n	307.045	0.747133	neg	Fertaric acid	HMDB0029199	Phenylpropanoids and polyketides	Cinnamic acids and derivatives	Hydroxycinnamic acids and derivatives	M-H2O-H, M-H	C14H14O9	36.3	0	-2.29181	2.00327	0.0137413	0.592789	0.888979	1.85187	73602.1	39744.8	44461.2	155900	86503.1	56048.2	72156.4	88594	72082	36598.2	54170.2	69507.5	18416.3	22421.3	43910.1	23525.4	25884.5	46638.1	47981	78861.1	24592	65218.6
8.63_331.2262m/z	331.226	8.62588	pos	11-deoxy-11-methylene-15-keto-PGD2	LMFA03010104	Lipids and lipid-like molecules	Fatty Acyls	Eicosanoids	M+H-H2O	C21H32O4	55.7	83.2	-1.63293	1.73803	0.0463576	0.746384	0.869293	1.82677	117396	64264.1	88837.3	51729.4	182057	178919	70670.7	83512.5	50697.2	125314	236029	106191	9821.29	29461.9	75628.1	40608.4	62852	22062.5	58056.6	130758	53473	159920
0.73_219.1700m/z	219.17	0.733317	pos	N-(5-Methyl-3-oxohexyl)alanine	HMDB0041540	Organic acids and derivatives	Carboxylic acids and derivatives	Amino acids, peptides, and analogues	M+NH4	C10H19NO3	42.9	22.3	-1.69388	5.23461	3.89411e-05	0.0725171	0.861916	1.81745	456718	251296	407568	643938	361041	486058	540322	443090	414289	444224	349133	477512	222381	358193	188775	133292	163030	331425	290760	360572	194652	269877
4.03_233.1260n	234.133	4.02672	pos	Hydroxypropionylcarnitine	LMFA07070074	Lipids and lipid-like molecules	Fatty Acyls	Fatty esters	M+H, M+Na	C10H19NO5	48	44.3	-1.1702	1.36879	0.000322031	0.136211	0.86034	1.81547	48253.9	26579.3	61123.7	45909.3	35718.8	61761.2	66917.5	31823.6	63225.8	37719.6	38914.8	39424.7	44823.7	28922.3	25228.1	30859	24792.2	21312.3	20987.1	28013.9	16893	23961.7
1.12_162.0757m/z	162.076	1.12177	pos	Glucosamine	HMDB0001514	Organic oxygen compounds	Organooxygen compounds	Carbohydrates and carbohydrate conjugates	M+H-H2O	C6H13NO5	38.3	0	-1.93697	1.62267	0.000101765	0.0802185	0.850985	1.80373	57402.5	31824.3	71871.8	56335.9	31962.1	57033.3	67567.8	33367.7	72478.6	67159.8	68170.5	48077.5	23728.5	27640	41343.7	28291.7	32155.3	30851.5	30895.9	28479.1	31538.7	43318.4
1.47_354.1402m/z	354.14	1.46837	pos	2-Pyrroloylglycine	HMDB0059778	Organic acids and derivatives	Carboxylic acids and derivatives	Amino acids, peptides, and analogues	2M+NH4	C7H8N2O3	38.8	0	-1.78255	1.12086	0.0462562	0.746384	0.847557	1.79945	32117.9	17848.7	61281.9	27118.3	13786.5	20025.8	25342.6	11473	55927.3	16632.7	62311.4	27279.7	16073.3	13834.9	13441.2	8107.14	16691.2	13927.5	31331.1	27374.9	17617.8	20088.3
0.75_134.1173m/z	134.117	0.747167	pos	Propanal	HMDB0003366	Organic oxygen compounds	Organooxygen compounds	Carbonyl compounds	2M+NH4	C3H6O	38.9	0	-1.84602	13.1867	8.2594e-06	0.0251764	0.817084	1.76184	2.81707e+06	1.59894e+06	2.57165e+06	3.75601e+06	2.53861e+06	3.19782e+06	3.08328e+06	2.9548e+06	2.71803e+06	2.34325e+06	2.31214e+06	2.69513e+06	1.47737e+06	2.15287e+06	1.29675e+06	943178	1.11649e+06	1.7446e+06	1.6907e+06	2.39997e+06	1.47827e+06	1.68917e+06
3.85_222.0792m/z	222.079	3.85307	pos	N-lactoyl-Methionine	HMDB0062182	Organic acids and derivatives	Carboxylic acids and derivatives	Amino acids, peptides, and analogues	M+H	C8H15NO4S	48.9	49.5	-1.03959	1.14018	0.0125089	0.57848	0.810148	1.75339	30506.3	17398.5	40587.9	20250.6	27667.2	33394.7	31996.4	12989.7	64261.5	19755.6	29544.3	24615.2	20391.5	20912.4	21734.9	14147.5	15919.1	12155.2	16975.6	24925.5	10465.6	16357.5
0.71_265.2118m/z	265.212	0.705617	pos	1-Nitrohexane	HMDB0013812	Organic 1,3-dipolar compounds	Allyl-type 1,3-dipolar organic compounds	Organic nitro compounds	2M+H	C6H14NO2+	38.9	0	-1.58347	1.09071	0.0223948	0.652086	0.752544	1.68476	36696.8	21781.6	39254.4	48950	43664.1	27321.8	27383.1	76464.5	41994.9	16795.8	30644.9	14494.7	20316.1	31972.9	29103.6	14425.9	19005.5	23789.4	14574	19046.7	21015.3	24566.9
7.00_353.2334m/z	353.233	6.99535	neg	5-trans PGF2α	36148	Unclassified	Unclassified	Unclassified	M-H	C20H34O5	51.3	62.7	0.0510967	1.28065	0.00334219	0.408171	0.716754	1.64348	32957.8	20053.7	17524.3	52811.4	35601.4	19976	29312.7	43486.2	39964.3	32173.7	29316.9	29411.5	17661.4	24565.4	25077.2	12165.1	14847.8	13859	15603.6	23659.2	28634.9	24463.1
7.11_276.1206n	299.11	7.1051	pos	Triethyl citrate	HMDB0034263	Organic acids and derivatives	Carboxylic acids and derivatives	Tricarboxylic acids and derivatives	M+H, M+NH4, M+Na	C12H20O7	42.8	19.3	-1.01555	1.14615	0.004866	0.453689	0.690596	1.61395	31650.5	19610.6	41348.9	46143	24983.5	33433	23738.5	37823.5	19910.4	34075.3	25988.4	29060.9	17553.6	18095.2	11958	8223.47	11093.4	36156.2	28264.2	23125.9	21476.4	20159.6
1.29_153.0657m/z	153.066	1.2882	pos	N-Methyl-4-pyridone-3-carboxamide	1502	Unclassified	Unclassified	Unclassified	M+H	C7H8N2O2	43.1	25.2	-1.22535	1.73049	0.00845294	0.530511	0.66521	1.5858	99806.3	62937.5	64939.8	93977.7	70040	104602	92317.4	102354	110081	198834	73003.5	87913.7	69087.5	83005.2	50452.4	50875.5	52293.6	61571.3	65004.8	72829.3	66904.2	57351.3
5.15_238.1071m/z	238.107	5.14902	pos	N-lactoyl-phenylalanine	263655	Organic acids and derivatives	Carboxylic acids and derivatives	Amino acids, peptides, and analogues	M+H	C12H15NO4	58.5	96.3	-1.27828	1.67202	0.0278745	0.683734	0.655139	1.57477	74837	47522.5	80897.1	50010.1	66451.6	88361.3	71932	38464.4	161212	54812.1	73831.5	62397.5	56458.2	48979.8	62052.3	42988.5	40035.8	36345.6	51053	70397.8	28291.5	38623
0.75_199.0005m/z	199	0.747133	neg	D-Erythrose 4-phosphate	HMDB0001321	Organic oxygen compounds	Organooxygen compounds	Carbohydrates and carbohydrate conjugates	M-H	C4H9O7P	44.1	31.2	-4.25855	1.43934	0.00273835	0.373925	0.643472	1.56208	84771.2	54268	93904.2	59039.3	69399.9	67085.1	130669	65884.9	89530.4	88101.4	105824	78273.7	37543.9	39845.2	79086.7	35512.9	79637.5	43022.7	60038.6	39449.7	63111.8	65431.3
4.57_374.0699n	375.077	4.57258	pos	Chlorophacinone	72320	Unclassified	Unclassified	Unclassified	M+H, M+Na	C23H15ClO3	39.4	33.4	-2.8046	1.45574	0.0493678	0.746384	0.630483	1.54808	51339.3	33163.1	49417.1	105033	65701	27613	46180.3	37086.5	56834.1	40437.2	47781.6	37309.7	12229.4	56630.9	28376	14958.6	21027.6	34538.4	55850	50089.3	21156.9	36774.3
1.22_162.1122m/z	162.112	1.219	pos	Malonyl-Carnitin	HMDB0062496	Organic nitrogen compounds	Organonitrogen compounds	Quaternary ammonium salts	M+H	C7H15NO3	38	0	-1.50292	1.00816	0.0172722	0.608562	0.630151	1.54773	31185.9	20149.5	33350.4	53242.1	37354.4	19566.9	29114.1	49283.1	31331.5	15869	22065.8	20682	18127.3	21396.5	25107.8	14166.5	17783.7	20341.8	16489.3	22297.8	17173.9	28610.4
0.72_162.1122m/z	162.112	0.71945	pos	L-Carnitine	34532	Organic nitrogen compounds	Organonitrogen compounds	Quaternary ammonium salts	M+H	C7H15NO3	57	88.5	-1.48795	9.85033	0.00795695	0.522838	0.628151	1.54558	3.00781e+06	1.94607e+06	3.32443e+06	4.07298e+06	3.15148e+06	2.13354e+06	2.75031e+06	5.18996e+06	2.78127e+06	1.84696e+06	2.62831e+06	2.19887e+06	1.41828e+06	2.00847e+06	2.48895e+06	1.11206e+06	1.69412e+06	2.29884e+06	1.95951e+06	1.97694e+06	1.66013e+06	2.84341e+06
0.83_338.9885m/z	338.989	0.830833	neg	D-myo-Inositol 1,4-bisphosphate	410	Organic oxygen compounds	Organooxygen compounds	Alcohols and polyols	M-H	C6H14O12P2	51.6	62.1	-0.785458	2.76227	0.0202518	0.6374	0.621048	1.53799	326064	212006	242519	408858	478186	189023	557076	286106	385425	252496	320678	140274	168315	221081	301638	131668	250471	273893	217970	160111	170765	224151
4.06_190.1072m/z	190.107	4.05705	pos	(2S)-2-{[1-(R)-Carboxyethyl]amino}pentanoate	66366	Unclassified	Unclassified	Unclassified	M+H	C8H15NO4	53.3	70.8	-0.954279	1.0436	0.0342537	0.706537	0.60433	1.52027	31482.3	20708.4	34527.9	22103.3	26366.2	35369.2	30059.3	15277	67150.2	24322.1	33453.2	26194.9	25142	21390.5	25591.5	17874.6	17867.5	15225.3	24462.4	28939	14408.3	16182.5
3.79_174.0218m/z	174.022	3.79213	pos	Piloty's Acid	44964	Unclassified	Unclassified	Unclassified	M+H	C6H7NO3S	38.6	0.15	-0.803169	3.24933	0.0205328	0.639254	0.588515	1.5037	209844	139552	177571	243557	160206	210002	249763	178034	292266	131775	223742	231527	113907	234384	111659	59146.8	76209.4	89251.7	132596	291413	171425	115531
7.72_206.0666m/z	206.067	7.71765	pos	1-Isothiocyanato-6-(methylsulfinyl)hexane	HMDB0038461	Organosulfur compounds	Sulfoxides	Unclassified	M+H	C8H15NOS2	47.5	43	-1.11303	1.41718	0.0173526	0.608562	0.585318	1.50037	62589.7	41716.2	93328	66993.4	63652.1	57922	59565	56612	54330	59929.3	56782.7	56782.6	22576.3	25837.9	19113.3	19386.4	19874.1	58223.7	75399	68021.3	51749	56980.8
0.73_337.0779m/z	337.078	0.73325	neg	Acaciabiuronic acid	HMDB0029938	Organooxygen compounds	Carbohydrates and carbohydrate conjugates	Sugar acids and derivatives	M-H2O-H	C12H20O12	37.7	0	0.660163	1.03687	0.0180748	0.615025	0.535326	1.44927	34666.4	23919.9	48676.9	41518.6	45115.4	47251.2	38173	26455.8	18010.1	13605.9	32285.3	35572	18699	26002	28388.2	13887.4	22622.5	29030	25051.1	28460.2	26410.1	20648.7
2.91_232.1540m/z	232.154	2.90923	pos	Isobutyryl-L-carnitine	HMDB0000736	Lipids and lipid-like molecules	Fatty Acyls	Fatty acid esters	M+H	C11H21NO4	53.8	72	-1.33471	9.75046	0.00386486	0.426908	0.421178	1.33902	2.94248e+06	2.19749e+06	2.65309e+06	2.21218e+06	2.79776e+06	3.08935e+06	2.77748e+06	3.26162e+06	3.652e+06	2.01535e+06	3.54581e+06	3.42019e+06	2.02013e+06	2.26065e+06	3.23714e+06	1.60666e+06	2.04309e+06	1.93383e+06	2.36308e+06	2.47309e+06	1.81891e+06	2.21831e+06
3.92_456.1042n	457.111	3.91638	pos	Flavin Mononucleotide	HMDB0001520	Nucleosides, nucleotides, and analogues	Flavin nucleotides	Unclassified	M+H, M+Na	C17H21N4O9P	56.5	87.7	-0.956281	1.17541	0.0493185	0.746384	0.413444	1.33186	85619.3	64285.5	164890	75514.3	63805.9	72971	86455.5	77432.7	69159.7	64665.2	96713.1	84586.1	74078.3	73416.9	61919.9	59529.6	56994.5	43732.8	79823.3	76955.8	49952.1	66451.6
0.68_194.0325m/z	194.033	0.6779	pos	L-2-Amino-3-(1-pyrazolyl)propanoic acid	HMDB0034267	Organic acids and derivatives	Carboxylic acids and derivatives	Amino acids, peptides, and analogues	M+K	C6H9N3O2	38.6	0	-0.759853	1.12337	0.0411838	0.726926	0.406919	1.32585	63095.1	47588.3	104785	42629.7	59389.2	46550.8	58910.1	53975.9	90888	65584.2	57585.8	50651.7	53913.2	37666.5	58463.2	52416.1	48193.7	30907.1	56754.5	60337.2	38667.5	38564.6
1.44_218.1384m/z	218.138	1.44065	pos	(±)-Propionylcarnitine	85176	Unclassified	Unclassified	Unclassified	M+H	C10H19NO4	52.3	65.7	-1.45855	5.59188	0.0409405	0.726926	0.384803	1.30568	1.15768e+06	886648	966912	1.29978e+06	921675	1.21024e+06	1.01672e+06	1.65495e+06	1.1871e+06	639685	1.55449e+06	1.12525e+06	661904	1.08494e+06	1.03129e+06	387512	805453	805319	905442	1.24403e+06	831795	1.10879e+06
0.73_102.0916m/z	102.092	0.733317	pos	xi-2,3-Dihydro-3-methylfuran	HMDB0037788	Organoheterocyclic compounds	Dihydrofurans	Unclassified	M+NH4	C5H8O	45.9	35.3	3.4405	3.93418	0.00407494	0.43441	0.333706	1.26025	642133	509529	568092	741746	676667	738525	673130	624847	595203	666219	539602	597296	435662	577287	475309	404570	408246	756648	525333	584549	454232	473456
2.07_240.1015m/z	240.101	2.071	pos	L-Cystathionine	HMDB0000099	Organic acids and derivatives	Carboxylic acids and derivatives	Amino acids, peptides, and analogues	M+NH4	C7H14N2O4S	38.5	0	0.985081	1.35037	0.0115209	0.568294	0.330924	1.25782	85019.4	67592.7	112557	78793.2	65324.3	77432.8	72228.2	90704.5	111270	79359.9	88905.5	73618.3	80689.7	66189.8	78947.5	71772.9	66233.3	47679.9	65334.4	82381.2	54026.2	62672.2
0.72_86.0371n	104.071	0.71945	pos	Gamma-Butyrolactone	HMDB0000549	Organoheterocyclic compounds	Lactones	Gamma butyrolactones	M+NH4, 2M+NH4	C4H6O2	38.3	0	3.76749	1.40998	0.0183667	0.615025	0.327607	1.25493	140645	112074	157685	111320	114881	161503	186678	122536	163899	119424	137716	130803	90311.8	115812	83823.4	79850.7	108126	133230	133596	148074	96923	130989
4.98_154.0992n	172.133	4.97632	pos	2,6-nonadienoic acid	35102	Lipids and lipid-like molecules	Fatty Acyls	Fatty Acids and Conjugates	M+H, M+NH4, M+H-H2O	C9H14O2	46.3	41.6	-0.913887	2.47436	0.0110408	0.568294	0.268803	1.20481	365727	303556	446045	340747	286557	331685	331021	379149	342938	397274	414539	387315	378575	337981	225401	275615	258583	319983	304832	357438	331953	245201
1.52_262.1645m/z	262.165	1.5238	pos	3-hydroxyisovalerylcarnitine	LMFA07070041	Lipids and lipid-like molecules	Fatty Acyls	Fatty esters	M+H	C12H23NO5	47.1	39.8	-1.41741	3.89972	0.0454398	0.746384	0.243655	1.18399	877001	740718	1.05373e+06	797421	702077	738444	815361	757134	1.13005e+06	1.08784e+06	842855	845094	746064	678043	918269	721921	824233	561929	790746	932968	601013	631990
0.76_151.0249m/z	151.025	0.7611	neg	D-2,3-Dihydroxypropanoic acid	HMDB0031818	Organic oxygen compounds	Organooxygen compounds	Carbohydrates and carbohydrate conjugates	M+FA-H	C3H6O4	40.2	5.59	1.19254	3.02546	0.0133775	0.590756	0.237404	1.17887	494624	419575	483612	415824	395139	454207	491076	540776	662989	517357	490334	494922	421471	453010	430440	383023	371490	421630	411449	526623	380397	396214
1.12_124.0586m/z	124.059	1.12177	pos	4-Ethyl-2,5-dimethylthiazole	HMDB0040069	Organoheterocyclic compounds	Azoles	Thiazoles	M+H-H2O	C7H11NS	36.5	0	4.53298	2.8918	0.0190676	0.622971	0.236871	1.17843	403806	342663	498808	427180	303273	370982	400764	381307	460887	384088	411530	399243	343197	389837	339391	258201	319472	337987	326691	456013	294236	361607
1.12_123.0553m/z	123.055	1.12177	pos	Niacinamide	1497	Organoheterocyclic compounds	Pyridines and derivatives	Pyridinecarboxylic acids and derivatives	M+H	C6H6N2O	50.5	58.6	0.0437336	10.876	0.0208596	0.639254	0.235811	1.17757	5.91593e+06	5.02385e+06	7.41072e+06	6.33088e+06	4.46147e+06	5.20943e+06	5.86039e+06	5.61204e+06	6.47817e+06	5.80099e+06	6.04659e+06	5.94862e+06	5.15512e+06	5.831e+06	4.76547e+06	3.77674e+06	4.60815e+06	5.0499e+06	4.82151e+06	6.65883e+06	4.33094e+06	5.24088e+06
4.28_376.1382n	421.137	4.28238	neg	Riboflavin (Vitamin B2)	233	Unclassified	Unclassified	Unclassified	M-H, M+FA-H	C17H20N4O6	55.7	80.3	-0.163431	1.73963	0.0107069	0.565442	0.208684	1.15563	205765	178054	235931	222229	173910	200035	214731	196042	209025	220242	187526	197974	172321	149928	198059	182974	173301	147733	212278	215670	150960	177311
4.76_234.0081m/z	234.008	4.75575	pos	Diloxanide	2265	Benzenoids	Phenol esters	Unclassified	M+H	C9H9Cl2NO2	31.2	0.436	-0.984296	1.17195	0.0480134	0.746384	0.152364	1.11139	120744	108642	136498	132816	99169.1	122688	114416	117916	110410	125598	127500	120429	119731	129098	94671.1	98009.6	88433.3	112033	119662	124649	104898	95236.3
1.13_151.0250m/z	151.025	1.12517	neg	Glycolic acid	HMDB0000115	Organic acids and derivatives	Hydroxy acids and derivatives	Alpha hydroxy acids and derivatives	2M-H	C2H4O3	40.3	4.11	1.065	5.14502	0.0452358	0.746384	0.1357	1.09863	1.93573e+06	1.76196e+06	1.97552e+06	1.82614e+06	1.65681e+06	1.89225e+06	1.88524e+06	2.14649e+06	1.80153e+06	2.00661e+06	1.99865e+06	2.1681e+06	1.77051e+06	1.95823e+06	1.92553e+06	1.55118e+06	1.36547e+06	1.80325e+06	1.78849e+06	2.04083e+06	1.7879e+06	1.62821e+06
11.64_325.1842m/z	325.184	11.6364	neg	4-Dodecylbenzenesulfonic Acid	HMDB0059915	Benzenoids	Benzene and substituted derivatives	Benzenesulfonic acids and derivatives	M-H	C18H30O3S	41.6	13	-0.338943	6.19328	0.0471679	0.746384	-0.396869	0.759505	1.16992e+06	1.54038e+06	784785	1.83444e+06	1.15336e+06	1.39168e+06	1.07803e+06	1.18234e+06	1.14461e+06	1.15384e+06	1.02609e+06	950041	1.46713e+06	1.65293e+06	982528	2.15107e+06	1.16627e+06	2.375e+06	1.13883e+06	1.11099e+06	1.47964e+06	1.87936e+06
9.57_330.3360m/z	330.336	9.57457	pos	Arachidic acid	LMFA01010020	Lipids and lipid-like molecules	Fatty Acyls	Fatty Acids and Conjugates	M+NH4	C20H40O2	44.6	28.8	-1.94138	4.3482	0.0391004	0.722069	-0.420917	0.74695	384692	515018	280890	423535	521165	382046	446317	317867	487057	370909	294350	322788	332218	388166	431395	701197	624432	513764	373091	375009	579958	830947
8.64_414.2037n	437.193	8.6412	pos	Armillaripin	HMDB0030404	Lipids and lipid-like molecules	Prenol lipids	Sesquiterpenoids	M+Na, M+K	C24H30O6	44.6	28.1	-1.287	1.6116	0.0184604	0.615025	-0.43082	0.74184	76455.4	103062	82340.9	89464.7	56776	112252	74521.5	62151.2	56781.3	69460.8	77496.4	83309.1	109903	84811.3	117486	139534	83060.5	144725	109132	70701.6	61315.6	109950
10.08_313.2731m/z	313.273	10.084	pos	MG(i-16:0/0:0/0:0)	HMDB0072844	Lipids and lipid-like molecules	Glycerolipids	Monoradylglycerols	M+H-H2O	C19H38O4	38.2	0	-1.98391	1.194	0.0394725	0.722759	-0.49309	0.710502	27756.3	39065.8	32566	31514.9	34821.5	19806.6	27461.8	22627.6	44471.2	19378.4	18387.7	26527.7	28334.6	36602.2	31371.4	50512.8	56183.7	23508.4	26731.6	26979.2	50074.4	60360.1
7.92_409.1616m/z	409.162	7.91538	pos	(3S,7E,9S)-9-Hydroxy-4,7-megastigmadien-3-one 9-glucoside	HMDB0036822	Lipids and lipid-like molecules	Fatty Acyls	Fatty acyl glycosides	M+K	C19H30O7	39.3	2.89	-1.95326	1.23692	0.0469987	0.746384	-0.496505	0.708822	52548.5	74135	65301.6	61960.7	25472	80581.1	50318.1	37867.4	28636.5	52195.4	57903.6	65248.6	99442.8	56097.3	85810.6	84644.1	47705.2	120565	85992	47192.8	35199.9	78700.6
0.56_158.9774m/z	158.977	0.556083	neg	Allitridin	HMDB0031154	Organosulfur compounds	Organic trisulfides	Unclassified	M-H2O-H	C6H10S3	38.1	0	4.62902	1.09254	0.0337334	0.70538	-0.499176	0.707511	23678.3	33467.1	17064.4	23232.2	23158.7	21564.8	20885.6	18829.1	37505.8	20912.1	27427.7	26202.8	18690.1	30728	23517.9	44493.1	45145.9	24472.4	26534.4	22688.8	51449	46950.9
9.74_241.2270m/z	241.227	9.74405	pos	(E,E)-2,4-Decadienoic isobutylamide	HMDB0030951	Organic acids and derivatives	Carboximidic acids and derivatives	Carboximidic acids	M+NH4	C14H25NO	39.3	2.2	-2.01744	1.11616	0.0479941	0.746384	-0.505073	0.704625	27951.4	39668.4	18668.2	31757	39324	24094.6	35204	21722.6	56456	17371	15840	19076.1	30174.9	47701	38615.4	61086.9	48857.3	41544.5	23787.7	27088.1	30418.3	47410.1
9.74_200.2006m/z	200.201	9.74405	pos	2-Dodecenal	HMDB0031020	Organic oxygen compounds	Organooxygen compounds	Carbonyl compounds	M+NH4	C12H22O	39.3	0	-1.62898	4.3315	0.0273826	0.681328	-0.523523	0.695671	368933	530327	270999	415396	525678	355634	449178	263817	664827	259658	222605	261539	410668	576945	540841	840450	641444	505721	307982	376883	449365	652969
0.75_519.2300m/z	519.23	0.747167	pos	Methionyl-Valine	HMDB0028986	Organic acids and derivatives	Carboxylic acids and derivatives	Amino acids, peptides, and analogues	2M+Na	C10H20N2O3S	35.9	0	3.67011	1.96163	0.0461225	0.746384	-0.536996	0.689205	119449	173314	153226	110291	194944	97448.2	137850	90931	94001.7	144050	67810.7	103935	221870	207291	120337	120412	88050	277409	271159	135030	98790.1	192790
10.33_497.2748n	498.282	10.3255	pos	PS(16:0/0:0)	LMGP03050002	Lipids and lipid-like molecules	Glycerophospholipids	Glycerophosphoserines	M+H, M+Na	C22H44NO9P	53.4	72.2	-1.11475	4.5955	0.0158965	0.606289	-0.538722	0.688381	386911	562059	359281	441306	441224	276010	412076	373150	600228	276884	384322	304626	380549	509596	400662	890115	639621	290365	572737	499476	759029	678441
11.08_597.3049m/z	597.305	11.0795	neg	PI(18:1(9Z)/0:0)	LMGP06050005	Lipids and lipid-like molecules	Glycerophospholipids	Glycerophosphoinositols	M-H	C27H51O12P	45.5	38.3	0.535542	5.22834	0.0384353	0.720589	-0.547833	0.684047	401359	586742	449259	566977	617059	254544	456936	302052	376858	297872	330387	361646	365905	526233	540490	895324	744981	474783	506310	359611	405523	1.04826e+06
10.36_479.3012n	478.294	10.3612	neg	PE(18:1(9Z)/0:0)	40778	Unclassified	Unclassified	Unclassified	M-H, 2M-H	C23H46NO7P	58.7	95.1	0.0238286	8.84902	0.0398362	0.723356	-0.56353	0.676645	1.16082e+06	1.71555e+06	1.21363e+06	1.75252e+06	1.57336e+06	857367	1.18489e+06	994546	1.25351e+06	651205	965099	1.16204e+06	1.18918e+06	1.62338e+06	1.46298e+06	2.38392e+06	2.33203e+06	1.07597e+06	1.102e+06	887228	1.97814e+06	3.12069e+06
9.60_374.3623m/z	374.362	9.6028	pos	2(R)-hydroxydocosanoic acid	HMDB0061660	Lipids and lipid-like molecules	Fatty Acyls	Fatty acids and conjugates	M+NH4	C22H44O3	37.3	0	-1.66878	1.12015	0.0340924	0.706537	-0.564095	0.67638	17525.5	25910.8	11412.2	21527.4	24370	20106.3	22716.6	9990.6	20037.1	16381.3	13364.9	15349.2	17035.7	22663.8	22509.7	40024.9	44242.5	24146.1	13006.5	15918.5	24907.7	34652.7
7.92_386.1723n	387.18	7.91538	pos	Gingerenone B	HMDB0035405	Phenylpropanoids and polyketides	Diarylheptanoids	Linear diarylheptanoids	M+H, M+NH4, M+K	C22H26O6	38.8	1.94	-1.6624	1.35046	0.0309966	0.695816	-0.567403	0.674831	49277.6	73022.2	53520.9	55646.2	23029.1	91481.1	48977	37076.9	27835.6	44628.6	55104.8	55475.6	85685.3	47889.9	94929.3	97115.3	49045.9	118383	76311.3	40410.7	51628.2	68823.1
12.28_756.5509m/z	756.551	12.2782	pos	PC(14:0/18:0)	HMDB0007871	Lipids and lipid-like molecules	Glycerophospholipids	Glycerophosphocholines	M+Na	C40H80NO8P	50.3	65.4	-0.643082	11.0206	0.0476786	0.746384	-0.64207	0.640793	2.43467e+06	3.79946e+06	3.41085e+06	2.89433e+06	1.97119e+06	2.54955e+06	2.55287e+06	4.61518e+06	2.33078e+06	779595	1.35619e+06	1.88613e+06	5.49767e+06	6.34684e+06	3.40799e+06	3.00934e+06	2.50339e+06	1.80979e+06	2.82892e+06	2.7907e+06	3.08701e+06	6.71295e+06
17.25_781.5593n	782.567	17.2487	pos	PC(16:0/20:4(5Z,8Z,11Z,14Z))	HMDB0007982	Lipids and lipid-like molecules	Glycerophospholipids	Glycerophosphocholines	M+H, M+Na	C44H80NO8P	52.9	89.3	-3.66306	12.8511	0.00821392	0.526665	-0.741219	0.598234	2.70305e+06	4.51838e+06	4.47612e+06	1.50917e+06	1.17674e+06	4.2854e+06	3.45972e+06	3.09668e+06	3.20356e+06	1.73459e+06	2.08291e+06	2.00561e+06	3.11268e+06	6.38229e+06	4.20606e+06	4.09968e+06	3.39459e+06	4.0568e+06	3.24389e+06	5.44628e+06	3.46057e+06	7.78099e+06
8.75_302.3049m/z	302.305	8.74873	pos	Safingol ( L-threo-sphinganine)	LMSP01080055	Lipids and lipid-like molecules	Sphingolipids	Sphingoid bases	M+H	C18H39NO2	49.3	51.5	-1.46001	4.5601	0.0450708	0.746384	-0.767174	0.587567	189409	322362	129654	257382	328685	170285	199703	150642	292237	85138.9	115744	164621	224700	240850	181704	543710	587967	215331	137823	155193	383138	553200
10.03_554.2873m/z	554.287	10.0272	pos	Vignatic acid A	HMDB0033599	Organic acids and derivatives	Carboxylic acids and derivatives	Amino acids, peptides, and analogues	M+H	C30H39N3O7	38.5	0	2.27325	1.08954	0.0338777	0.706138	-0.773283	0.585084	36440.3	62282.2	10420.6	50752.8	59503.5	20369.7	35730	41589.6	69909.5	7804.69	27332.9	40990.2	61223.7	41542.4	64044.6	74942.6	107817	18527.6	32034.7	107981	60550.1	54158.8
17.49_524.2988m/z	524.299	17.4904	neg	LysoPE(18:1(9Z)/0:0)	HMDB0011506	Lipids and lipid-like molecules	Glycerophospholipids	Glycerophosphoethanolamines	M+FA-H	C23H46NO7P	37.1	0	-1.19439	1.1046	0.0157979	0.606289	-0.777465	0.583391	22563.1	38675.8	24633.2	40450.2	29058.2	15233.1	21320.8	17559.3	30527.5	11127.8	16172.8	19548	30667	46816.6	37355	43240.4	41625.1	11786.8	24000.9	27909	74448	48909
5.94_905.3580m/z	905.358	5.9421	pos	25-Acetyl-6,7-didehydrofevicordin F 3-[glucosyl-(1->6)-glucoside]	HMDB0036339	Lipids and lipid-like molecules	Steroids and steroid derivatives	Steroidal glycosides	M+K	C43H62O18	31.6	0	1.44767	1.41959	0.011265	0.568294	-0.833395	0.561207	24400.6	43478.8	33318.1	3715.14	21697.8	19098.1	14556.9	21373.4	45103.6	17848.3	34442.3	32852.3	46362.6	21374.8	40490.4	75889.4	67840.5	39393.9	44110.6	46040.9	20428.7	32856.4
12.42_331.2625m/z	331.263	12.4211	pos	DPA	LMFA04000044	Lipids and lipid-like molecules	Fatty Acyls	Docosanoids	M+H	C22H34O2	54.3	77.9	-1.88687	3.81644	0.048442	0.746384	-0.890004	0.539613	116194	215328	108996	107996	193965	133765	105805	77064.9	193691	61045.3	58299.2	121308	139835	223772	154564	293032	316801	91412.2	94612.8	108992	185001	545256
8.80_258.2788m/z	258.279	8.79542	pos	7Z-hexadecen-1-ol	LMFA05000055	Lipids and lipid-like molecules	Fatty Acyls	Fatty alcohols	M+NH4	C16H32O	43.5	23.9	-1.37193	1.10167	0.0355475	0.714495	-0.898321	0.536511	8926.17	16637.4	5956.65	12733.7	15487.8	7875.06	9671.48	7468.8	13283.4	3317.15	5855.22	7612.41	10691	12295.4	9352.36	29542.6	32747.8	11283	5666.69	7036.3	20340.8	27418.4
17.49_526.3125m/z	526.313	17.4922	pos	26,26,26,27,27,27-hexafluoro-1alphaa-hydroxyvitamin D3 / 26,26,26,27,27,27-hexafluoro-1alphaa-hydroxycholecalciferol	LMST03020085	Lipids and lipid-like molecules	Sterol Lipids	Secosteroids	M+NH4	C27H38F6O2	36	0	2.19614	1.57026	0.0147383	0.60139	-1.03296	0.488707	29736.5	60847.2	14829.9	54532.4	67216	14339.2	21833.8	24908.3	44072.8	4553.8	18153.2	32925.3	32677.2	58425.9	59161.4	81711.5	74107.8	8515.28	37528.9	55379.6	117179	83785.8
0.76_245.1127m/z	245.113	0.761033	pos	(2S,4S)-Pinnatanine	HMDB0029439	Organic acids and derivatives	Carboxylic acids and derivatives	Amino acids, peptides, and analogues	M+H	C10H16N2O5	38.9	0	-1.85613	1.03784	0.0190807	0.622971	-1.10462	0.465026	8056.74	17325.3	14017.9	7.93017e-07	15693	7.93017e-07	4863.88	17143.9	7.93017e-07	15109.7	7863.88	5875.09	20053.2	5198.5	17852.6	22721	19620.2	34608.2	22082.3	6298.88	7414.93	17403.5
0.80_431.0360m/z	431.036	0.803017	neg	C.I. Food Red 6	HMDB0032738	Benzenoids	Naphthalenes	Naphthalene sulfonic acids and derivatives	M-H2O-H	C19H18N2O7S2	33.4	0	-3.70651	1.30734	0.0247351	0.671672	-1.12153	0.459605	14415.3	31364.6	11008.7	3980.78	14690.4	7352.18	2028.33	22065.4	7.93017e-07	53898.7	22327.5	6801.19	17329.4	6775.19	47200.7	44263.3	40870.8	29016.7	49357.7	13264.8	26995.2	38571.9
0.73_296.0208m/z	296.021	0.73325	neg	Uracil mustard	HMDB0014929	Organic nitrogen compounds	Organonitrogen compounds	Nitrogen mustard compounds	M+FA-H	C8H11Cl2N3O2	30.8	0	-0.958424	1.23802	0.0171705	0.608562	-1.1273	0.457771	14495.7	31665.7	43717.6	2782.78	16322.4	4801.31	7.93017e-07	16840.3	7.93017e-07	32551.7	22636.5	5303.87	26874.6	10776.7	51648.3	24721.4	38173.8	29981.2	35452.3	9013.49	41539.4	48475.8
6.43_890.1360m/z	890.136	6.42823	pos	Isovaleryl-CoA	LMFA07050336	Lipids and lipid-like molecules	Fatty Acyls	Fatty esters	M+K	C26H44N7O17P3S	36.4	0	0.174341	1.3017	0.021416	0.649114	-1.14345	0.452676	10651.6	23530.4	13908.7	6194.3	18563.8	7021.04	10409.4	3232.78	19774.2	8954.19	5724.22	12733.7	6613.28	22110.9	19870.9	46633.7	49953.8	5358.64	25345.9	19594.8	10785.4	29036.5
6.44_889.8018m/z	889.802	6.44463	pos	Schleichol 1	HMDB0036253	Lipids and lipid-like molecules	Steroids and steroid derivatives	Stigmastanes and derivatives	2M+H	C30H52O2	33.4	0	1.14908	1.21423	0.0316362	0.696895	-1.21082	0.432023	8439.5	19534.9	9692.34	4350.04	17233.3	2660.36	9235.08	1165.15	22489.3	4962.89	5971.8	6634.76	4678.57	13847.6	16821.4	39223.5	43884.2	5197.48	18473.9	13582.2	10987	28652.7
6.44_890.4699m/z	890.47	6.44463	pos	alpha-Chaconine	HMDB0039353	Lipids and lipid-like molecules	Steroids and steroid derivatives	Steroidal glycosides	M+K	C45H73NO14	33.1	0	4.28934	1.15939	0.0247872	0.671672	-1.24051	0.423224	8433.13	19925.9	8427.82	3688.98	16071.1	4766.09	8861.35	2380.33	17567.9	4233.94	5163.76	13170	7971.55	16003.3	19310	39480.6	44663.9	1753	19348	21029.4	5359.33	24340.1
17.15_600.5211m/z	600.521	17.1536	neg	Cer(t18:0/16:0)	LMSP02030001	Lipids and lipid-like molecules	Sphingolipids	Ceramides	M+FA-H	C34H69NO4	53.9	76.2	0.408584	2.44991	0.0307643	0.695816	-1.54123	0.343592	20357.1	59247.7	18090.9	26073.2	53954	7460.7	25661.6	8675.42	35970.9	7.93017e-07	9501.06	18182.8	23744.1	36477.3	11105.2	77692.5	129481	15625.8	34685.6	22977.4	89983.7	150704
8.22_372.2659n	373.273	8.21502	pos	3alpha-Hydroxy-5beta-chola-7,9(11)-dien-24-oic Acid	LMST04010330	Lipids and lipid-like molecules	Sterol Lipids	Bile acids and derivatives	M+H-H2O, M+H	C24H36O3	50.9	60.7	-1.37733	1.55175	0.00327408	0.408171	-1.83305	0.28067	23088.3	82261.6	29702.7	67343.4	17341.2	7880.05	24173	15901.5	19026.2	16568.8	23086.1	9860.34	30294.4	161994	113288	51877.5	23920.9	18622.4	104955	96329.4	156324	65009.1
8.22_408.2876n	453.286	8.22133	neg	Cholic acid	206	Lipids and lipid-like molecules	Steroids and steroid derivatives	Bile acids, alcohols and derivatives	M-H, M+FA-H	C24H40O5	47.3	40.8	0.0846053	1.40188	0.00234618	0.341911	-1.92148	0.263983	15324.5	58051.2	17737.4	43002.9	11672.1	5192.27	15587.1	10484.7	13437.4	12973.6	16331.6	6826.24	18882	106867	79706.2	35276.8	19136.4	15644.4	75424.9	61542.7	117534	50496.8
11.90_368.4245m/z	368.424	11.9048	pos	7Z-Pentacosene	LMFA11000097	Lipids and lipid-like molecules	Fatty Acyls	Hydrocarbons	M+NH4	C25H50	38.1	0	-1.74972	1.00795	0.0453078	0.746384	-2.06174	0.239527	9948.15	41532.4	1128.22	15125.5	14362.8	2223.59	4831.06	11843.3	36613.1	1353.05	5550.4	6450.39	33319.7	23422.5	160910	62531.5	43187.6	10548.8	10719.7	8033.46	36053.6	26598
