# Supplementary material
Source: HighWire-hosted journal article supplement (https://gut.bmj.com/content/gutjnl-2020-320992)
Supplement: inline-supplementary-material-18 [file inline-supplementary-material-18.xlsx]

## Sheet: Sheet1
	Figure 6b x-axis: 5wk AOS blood metabolites			Figure 6b y-axis: IM2-5 blood metabolites
	From right to left			From up to down
	octatriacontanoic acid			Cholesterol sulfate
	Hemorphin-4			PA(20:4(5Z,8Z,11Z,14Z)/24:1(15Z))
	N-(2'-(4-benzenesulfonamide)-ethyl) arachidonoyl amine			PA(20:4(8Z,11Z,14Z,17Z)/24:1(15Z))
	Dimethylprotoporphyrin IX dimethyl ester			PC(20:3(5Z,8Z,11Z)/0:0)
	PC(5:0/5:0)			octatriacontanoic acid
	LysoPE(0:0/20:2(11Z,14Z))			7-Acetoxy-6-hydroxylimonin
	TG(16:0/16:0/18:1(9Z))			PC(20:3(8Z,11Z,14Z)/16:0)
	15-Oxo-21-hydroxymabiogenin 3-[rhamnosyl-(1->6)-glucoside]			(alpha-keto-dimethyl-delta-N,N-Dimethylguanidynol) valeric acid
	TG(15:0/16:0/20:2(11Z,14Z))			PC(16:0/20:3(5Z,8Z,11Z))
	Myricanone	Increased in A0 vs BA0		Glycerophosphocholine
	N6-Galacturonyl-L-lysine	Decrease in BA0 vs. BA10		PC(0:0/20:4(5Z,8Z,11Z,14Z))
	OPC4-CoA			PC(9:0/9:0)
	LysoPE(0:0/20:0)			PC(18:1(11Z)/0:0)
	PC(P-19:1(12Z)/0:0)	positive		LysoPC(16:1(9Z)/0:0)
	PC(20:5(5Z,8Z,11Z,14Z,17Z)/0:0)			PC(18:2(9Z,12Z)/0:0)
	17beta-Hydroxy-4,4,17-trimethylandrost-5-en-3-one			Polysorbate 20
	Thiabendazole			Amoritin
	(S)-Isowillardiine			LysoPE(18:0/0:0)
	3-[(5-Methyl-2-furanyl)methyl]-1H-pyrrole			PC(0:0/16:0)
	2,3,4,5-Tetrahydro-6-(5-methyl-2-furanyl)pyridine			PC(16:0/0:0)[U] / PC(16:0/0:0)[rac]
	Carbetocin			PC(18:2(2E,4E)/0:0)
	20-Hydroxyrutacridone epoxide			LysoPC(18:2(9Z,12Z))
	Platydesminium			PC(17:2(9Z,12Z)/0:0)
	Hyoscyamine			PC(19:1(9Z)/0:0)
	PI(18:0/18:2(9Z,12Z))			PE(0:0/22:1(13Z))
	SM(d18:1/18:0)			LysoPC(20:1(11Z))
	PE(14:0/22:2(13Z,16Z))			PC(17:1(10Z)/0:0)
	2,2-dichloro-1,1-ethanediol			LysoPE(20:1(11Z)/0:0)
	PE(16:0/22:4(7Z,10Z,13Z,16Z))			Cinereain
	Hydrogen carbonate			PC(16:0/3:0)
	PC(17:2(9Z,12Z)/0:0)	Decreased in A0 vs. BA0		PC(18:0/2:0)
	PC(18:2(2E,4E)/0:0)	Increased in BA0 vs. BA10		D-Galactose
	9(Z),11(E)-Conjugated Linoleic Acid			PC(16:1(9Z)/20:2(11Z,14Z))
	N-Undecanoylglycine			Aminoadipic acid
	29:2(5Z,9Z)(6Br)			Aspartyl-Cysteine
	Genipic acid			Lathosterol
	Ethyl 4-methylphenoxyacetate			Ovalicin
	3-Hydroxysebacic acid			Lactosylceramide (d18:1/12:0)
				6-[5-(5,7-dihydroxy-4-oxo-3,4-dihydro-2H-1-benzopyran-2-yl)-2-hydroxyphenoxy]-3,4,5-trihydroxyoxane-2-carboxylic acid
				Glycitein 4'-O-glucuronide
		positive		17-hydroxy stearic acid
				L-phenylalanyl-L-hydroxyproline
				15-deoxy-delta-12,14-PGJ2-d4
				PC(20:3(8Z,11Z,14Z)/18:1(9Z))	Increased by A10-FMT
				PA(20:5(5Z,8Z,11Z,14Z,17Z)/24:0)
				3-Indole carboxylic acid glucuronide
				2-[3-(sulfooxy)phenyl]acetic acid
				Pantothenic Acid
				Xanthotoxol glucoside
